# Supplementary material for: Effects of whole-body vibration training on lower limb motor function and neural plasticity in patients with stroke: protocol for a randomised controlled clinical trial
Source: PubMed Central journal article supplement — BMJ Open. 2022 Jun 27;12(6):e060796. doi: 10.1136/bmjopen-2022-060796 (PMC9240887; doi:10.1136/bmjopen-2022-060796), 2022-06-27
Supplement: bmjopen-2022-060796.draft_revisions.pdf [file bmjopen-2022-060796.draft_revisions.pdf]

# BMJ Open

BMJ Open is committed to open peer review. As part of this commitment we make the peer review history of every article we publish publicly available.

When an article is published we post the peer reviewers' comments and the authors' responses online. We also post the versions of the paper that were used during peer review. These are the versions that the peer review comments apply to.

The versions of the paper that follow are the versions that were submitted during the peer review process. They are not the versions of record or the final published versions. They should not be cited or distributed as the published version of this manuscript.

BMJ Open is an open access journal and the full, final, typeset and author-corrected version of record of the manuscript is available on our site with no access controls, subscription charges or pay-per-view fees (<http://bmjopen.bmj.com>).

If you have any questions on BMJ Open's open peer review process please email [info.bmjopen@bmj.com](mailto:info.bmjopen@bmj.com)

# BMJ Open

## Effects of whole-body vibration training on lower-limb motor function and neural plasticity in stroke patients: protocol for a randomized controlled clinical trial

|                               |                                                                                                                                                               |
|-------------------------------|---------------------------------------------------------------------------------------------------------------------------------------------------------------|
| Journal:                      | <i>BMJ Open</i>                                                                                                                                               |
| Manuscript ID                 | bmjopen-2022-060796                                                                                                                                           |
| Article Type:                 | Protocol                                                                                                                                                      |
| Date Submitted by the Author: | 04-Jan-2022                                                                                                                                                   |
| Complete List of Authors:     | Zhang, Mingkai; Shanghai University of Sport<br>jianing, wei; Shanghai University of Sport, School of Psychology<br>Wu, Xueping; Shanghai University of Sport |
| Keywords:                     | Stroke < NEUROLOGY, SPORTS MEDICINE, REHABILITATION MEDICINE                                                                                                  |
|                               |                                                                                                                                                               |

SCHOLARONE™  
Manuscripts

**Title:** Effects of whole-body vibration training on lower-limb motor function and neural plasticity in stroke patients: protocol for a randomized controlled clinical trial

**Article Type:** Clinical Study Protocol

**Keywords:** Stroke; Whole body vibration training; Lower limbs; Neural plasticity;

Study protocol

**Corresponding Author:** Xueping Wu

**Corresponding Author's Institution:** Shanghai University of Sport

**First Author:** Mingkai Zhang

**Order of Authors:** Jianing Wei

## ABSTRACT

**Introduction** Lower-limb motor dysfunction is very common in stroke patients, and usually caused by brain neural connectivity disorder. Recent studies have shown that whole-body vibration training (WBVT) significantly improves lower-limb motor function in stroke patients, and may promote nerve remodeling. The purpose of this study is to investigate the effects of WBVT on lower-limb motor function and neuroplasticity in stroke patients.

**Methods** A single-blind randomized controlled trial will be conducted. Sixty stroke patients will be recruited and allocated randomly to WBVT, routine rehabilitation training (RRT), and control groups. The WBVT and RRT interventions will be implemented as five 25-min sessions per week for 12 weeks; the control group will receive no exercise intervention. Transcranial magnetic stimulation will be used to assess neural plasticity, and lower-limb motor function will be assessed using indicators of strength, walking ability, and joint activity. Assessments will be conducted at baseline, 6 weeks, and 12 weeks, and at 4 and 8 weeks after intervention completion.

**Ethics and dissemination** This study has been approved by the Shanghai University of Sport Research Ethics Committee (102772021RT067) and will provide data on the effects of WBVT relative to RRT in terms of the improvement of stroke patients' lower-limb motor function and neural plasticity. The results of this study can provide a theoretical basis for the application of WBVT for stroke patients.

**Trail registration number:** This study has been registered prospectively in the Chinese Clinical Trail Registry (ChiCTR2200055143, 1 January 2022).

**Title:** Effects of whole-body vibration training on lower-limb motor function and neural plasticity in stroke patients: protocol for a randomized controlled clinical trial

**Type of Manuscript:** Clinical Study Protocol

1  
2  
3  
4 **Authors: Mingkai Zhang<sup>1</sup>, Jianing Wei<sup>2</sup>, Xueping Wu<sup>1\*</sup>**  
5  
6  
7

8  
9 **Affiliation:**

10  
11  
12 <sup>1</sup> Shanghai University of Sport, Shanghai, China

13  
14 <sup>2</sup> School of Psychology, Shanghai University of Sport, Shanghai, China  
15  
16

17  
18  
19 **Figures and tables:** 2 figures and 6 tables

20  
21  
22 **Number of Words:** Abstract: 240 words; Manuscript: 4,384 words  
23  
24  
25

26  
27 **\* Corresponding author:**

28  
29 Xueping Wu

30  
31 Shanghai University of Sport

32  
33 650 Qing Yuan Huan Road, Shanghai, China, 200438

34  
35 E-mail:wuxueping@sus.edu.cn  
36  
37  
38  
39  
40

41  
42 **Abbreviations**

43  
44 WBVT, Whole body vibration training

45  
46 RRT, routine rehabilitation training

47  
48 MEP, Motor evoked potential

49  
50 Pre-SMA, pre-supplementary motor area

51  
52 FMA, Fugl-Meyer assessment

53  
54 TUG, Time up and go  
55  
56  
57  
58  
59  
60

# Effects of whole-body vibration training on lower-limb motor function and neural plasticity in stroke patients: protocol for a randomized controlled clinical trial

## ABSTRACT

**Introduction** Lower-limb motor dysfunction is very common in stroke patients, and usually caused by brain neural connectivity disorder. Recent studies have shown that whole-body vibration training (WBVT) significantly improves lower-limb motor function in stroke patients, and may promote nerve remodeling. The purpose of this study is to investigate the effects of WBVT on lower-limb motor function and neuroplasticity in stroke patients.

**Methods** A single-blind randomized controlled trial will be conducted. Sixty stroke patients will be recruited and allocated randomly to WBVT, routine rehabilitation training (RRT), and control groups. The WBVT and RRT interventions will be implemented as five 25-min sessions per week for 12 weeks; the control group will receive no exercise intervention. Transcranial magnetic stimulation will be used to assess neural plasticity, and lower-limb motor function will be assessed using indicators of strength, walking ability, and joint activity. Assessments will be conducted at baseline, 6 weeks, and 12 weeks, and at 4 and 8 weeks after intervention completion.

**Ethics and dissemination** This study has been approved by the Shanghai University of Sport Research Ethics Committee (102772021RT067) and will provide data on the effects of WBVT relative to RRT in terms of the improvement of stroke patients' lower-limb motor function and neural plasticity. The results of this study can provide a theoretical basis for the application of WBVT for stroke patients.

**Trail registration number:** This study has been registered prospectively in the Chinese Clinical Trail Registry (ChiCTR2200055143, 1 January 2022).

### Strengths and limitations of this study

1. Because it is a sports intervention, the safety of the stroke patients during exercise is worth worrying about.
2. How to select and control participants in a longitudinal study is one of the difficulties of this project.
3. The patients will come from one geographic area which limits the generalisability.

## INTRODUCTION

Stroke is prevalent and associated with high disability, recurrence, and mortality rates.<sup>[1]</sup> The latest global burden of disease study shows that the overall lifetime risk of

1  
2  
3 stroke in China is 39.9%, ranking first in the world, Stroke is also the leading cause  
4 among diseases of lost years of life in China.<sup>[2]</sup> Stroke patients often have a variety of  
5 sequelae. The most common is hemiplegia, which is characterized by numbness and  
6 weakness of one limb and continuous increases in muscle tension, which significantly  
7 reduce patients' ability to perform daily activities and quality of life.<sup>[3]</sup> Lower-limb  
8 function can be restored only to a certain extent in more than 70% of hemiplegic  
9 patients, and most such patients cannot obtain a good gait or walking speed.<sup>[4]</sup> Lower-  
10 limb motor dysfunction after stroke is caused by central nervous system injury  
11 and results in abnormal movement patterns.<sup>[5]</sup> Its main characteristics are poor  
12 muscle strength,<sup>[6]</sup> spasm,<sup>[5]</sup> joint instability,<sup>[7]</sup> combined reactions,<sup>[8]</sup> and joint  
13 movement.<sup>[9]</sup> Thus, the improvement of affected patients' muscle strength,  
14 balance, and walking ability is key to the improvement of their lower-limb  
15 motor function.

16  
17  
18  
19  
20 Neural plasticity generally refers to the nervous system's inherent ability  
21 to make structural and functional changes to adapt to changes in the internal  
22 and external environments.<sup>[10]</sup> Changes in neural plasticity after stroke have  
23 been shown to be the basis for the recovery of motor function.<sup>[11]</sup> After  
24 unilateral stroke, neural plasticity includes two aspects: 1) changes in neural  
25 synaptic connections and 2) changes in the excitability of various structures.  
26 Functional recovery after stroke is related to changes in the brain's anatomical structure  
27 and function, in the motor cortex and other regions.<sup>[12]</sup> The presence of lesions on  
28 one side of the cerebral hemisphere reduces or inhibits the excitability of the  
29 motor cortex on that side<sup>[13]</sup>, and improvement of this excitability is key to  
30 rehabilitation. The primary motor cortex (M1) provides the main output to the  
31 descending motor system and autonomous motor commands, and is linked closely  
32 to somatosensory and spatial processing in the parietal lobe, premotor cortex, and  
33 auxiliary motor area; thus, changes in its excitability alter motor function<sup>[14]</sup>. M1 is also  
34 defined as the scalp site where the minimum stimulation intensity causes the maximum  
35 motor evoked potential (MEP) of the muscle. Thus, changes in the MEP reflect motor  
36 function<sup>[15]</sup>. The pre-supplementary motor area (pre-SMA), located between the  
37 prefrontal lobe and motor system, is responsible for language and idea generation,  
38 action recognition, working memory maintenance, learning, and the execution of action  
39 sequences, among other functions<sup>[16]</sup>. The enhancement of pre-SMA activity has been  
40 found to alleviate M1 disorder in stroke patients, and changes in connectivity between  
41 motor areas may contribute to the improvement of motor function in these patients<sup>[17]</sup>.  
42 Thus, the recovery of limb motor function in stroke patients is related to the functional  
43 connectivity between cerebral hemispheres and the normalization of the bilateral  
44 sensorimotor cortical network.

45  
46  
47  
48  
49  
50  
51  
52  
53  
54  
55  
56  
57  
58  
59  
60  
Exercise intervention therapy has the advantages of high compliance, minimal side  
effects, and strong operability. It has become an important means of rehabilitation for  
stroke patients<sup>[18]</sup>. Functional recovery after stroke is a complex process, and repeated  
sensory input is among the most effective means of improving the cortical structure and  
body function<sup>[19]</sup>. The repeated performance of specific actions during physical  
exercise has been found to establish motor memory, which is a form of brain plasticity

1  
2  
3 improvement<sup>[20]</sup>. Thus, in addition to improving muscle strength and joint activity,  
4 exercise intervention therapy can aid the recovery of neural plasticity and brain function,  
5 thereby promoting the recovery of motor function<sup>[21]</sup>. However, after the acute phase of  
6 stroke, patients have limited active motor ability and their executive function is affected  
7 to a certain extent; these factors make it difficult for them to skillfully remember and  
8 perform complex and diverse rehabilitation actions, which may hinder the effectiveness  
9 of rehabilitation exercise<sup>[22]</sup>. Thus, the key to effective rehabilitation is to give patients  
10 greater motor stimulation within their limited range of activities.

11  
12  
13 As a passive training method, whole-body vibration training (WBVT) involves the  
14 generation of mechanical waves through a training platform to stimulate muscle  
15 vibration and neuromuscular regulation and adaptation<sup>[23]</sup>. It has also been found to  
16 effectively improve the lower-limb muscle strength<sup>[24]</sup>, spasm<sup>[25]</sup>, walking ability<sup>[26]</sup>,  
17 and balance<sup>[27]</sup> of many people, including stroke patients. A review of the clinical  
18 application of WBVT in patients with chronic stroke showed that its main effects  
19 include the reduction of spasm, promotion of muscle contraction, stimulation of the  
20 proprioceptive system, and improvement of motor control ability<sup>[28]</sup>. WBVT has also  
21 been shown to increase oxygen consumption and promote the release of vasodilators in  
22 stroke patients, without additional effects on the heart rate or blood pressure<sup>[29]</sup>. Thus,  
23 a period of such training can improve blood perfusion on the affected side in stroke  
24 patients, thereby alleviating muscle tension, eliminating spasm, and improving balance  
25 and walking ability<sup>[30]</sup>. In addition, a transcranial magnetic stimulation (TMS) study  
26 revealed significant changes in cortical excitability after vibration training in healthy  
27 people<sup>[31]</sup>. The convergence of evidence from several experimental studies suggests that  
28 WBVT induces the reorganization of sensory motor processes in the brain in healthy  
29 people<sup>[24]</sup>. It may also promote functional recovery after stroke by enhancing the  
30 proprioceptive afferents of the central nervous system, inducing cortical and subcortical  
31 reorganization based on the rebalancing and shaping of cortical and subcortical sensory  
32 motor representations<sup>[24]</sup>. However, the authors of that study believe that WBVT is  
33 more suitable for patients who have experienced acute or subacute stroke than for those  
34 with chronic stroke. Marconi et al.<sup>[32]</sup> found that repeated muscle vibration reduced  
35 muscle tension and improved motor function on the affected side in stroke patients.  
36 TMS revealed that the motor thresholds of these patients decreased, their MEP  
37 amplitudes increased, and their flexor muscle activation improved.<sup>[32]</sup> Thus, the authors  
38 concluded that changes in cortical excitability are related to motor function, and that  
39 WBVT is a suitable non-drug treatment even after lengthy illness to promote the  
40 recovery of neural plasticity and motor function in stroke patients.<sup>[32]</sup> Thus, WBVT can  
41 effectively improve the motor function of stroke patients, and may also have a strong  
42 effect on brain neural plasticity. However, little research on this topic has been  
43 conducted, and researchers have reached different conclusions. In addition, the  
44 vibration training types and parameters that are effective in this context have not been  
45 identified; further research is needed.

46  
47  
48 In sum, little research has examined the application of WBVT for the rehabilitation  
49 of stroke patients, and especially the impact of WBVT on these patients' brain function.  
50 Thus, this randomized controlled trial (RCT) was designed to examine the effect of  
51  
52  
53  
54  
55  
56  
57  
58  
59  
60

WBVT on stroke patients' lower-limb motor function and neural plasticity. Isokinetic muscle strength will be measured to examine changes in lower-limb muscle strength, and TMS will be used to examine changes in neural plasticity. Changes in secondary outcomes, such as patients' walking ability, balance, and quality of life, will also be assessed. We will compare the effect of WBVT with that of routine rehabilitation training, and observe differences in effect maintenance between these methods.

## AIMS AND OBJECTIVES

We aim to determine the effect of 12 weeks of WBVT on stroke patients' lower-limb motor function and neural plasticity, and explore the difference between wbvt and routine rehabilitation training after 6 and 12 weeks of training. In addition, we will evaluate and compare it after 4 and 8 weeks of stopping training. We will also assess the feasibility of a future full-scale RCT.

The study objectives are to:

1. clarify the effects of WBVT on stroke patients' lower-limb motor function and neural plasticity;
2. analyze the training effects and maintenance times of the two training methods;
3. explore the facilitators, barriers, and contextual factors influencing the implementation of WBVT; and
4. test the acceptability of the data collection procedures used.

## METHODS AND DESIGN

### Study design

This study was designed as a prospective single-blind RCT. Eligible participants with stroke will be assigned randomly to the whole-body vibration training group (WBVG), routine rehabilitation training group (RRTG), and control group (CG) at a ratio of 1:1:1. The WBVG and RRTG will receive exercise interventions in the Sports Laboratory of Shanghai University of Sport, Shanghai, China. The CG will maintain their routine daily lives. The interventions will be implemented 5 times a week for 12 weeks. Participants will be evaluated at baseline, after 6 and 12 weeks of intervention, and 4 and 8 weeks after intervention termination (Figure 1). This research protocol has been approved by the research ethics committee of Shanghai University of Sport (no. 102772021RT067).

**Figure 1.** Diagram of study flow.

### Participants

Participants in Shanghai will be recruited through community outreach, from outpatient clinics, with media advertising, and by telephone. All participants will follow their routine medication and physical therapy/massage regimens during the study period. They will provide written informed consent before inclusion in the study. Before and after the intervention, data on participants' demographic and clinical characteristics will be collected and analyzed (Table 1).



**Table 1.** Demographic and clinical characteristics of participants

|                                     | WBVG | RRTG | CG |
|-------------------------------------|------|------|----|
| Age                                 |      |      |    |
| Gender                              |      |      |    |
| Height                              |      |      |    |
| Weight                              |      |      |    |
| Time of illness                     |      |      |    |
| Stroke type                         |      |      |    |
| Affected side                       |      |      |    |
| Whether auxiliary equipment is used |      |      |    |
| FMA score                           |      |      |    |
| Berg score                          |      |      |    |
| TUGT                                |      |      |    |
| MoCA score                          |      |      |    |
| SF-36                               |      |      |    |

Note: WBVG, Whole body vibration training group; RRTG, routine rehabilitation training group; CG, control group

### **Inclusion and exclusion criteria**

The inclusion criteria will be: 1) clinical diagnosis of first ischemic or hemorrhagic stroke, 2) Brunnstrom stage IV, 3) ability to stand and walk without the help of another person, 4) stable medical condition, 5) duration of illness  $\geq 3$  months and 7) no vibration training experience. The exclusion criteria will be: 1) diagnosis of transient ischemic attack or subdural or epidural hemorrhage; 2) other nervous system disease; 3) severe skeletal muscle or cardiovascular disease; 4) severe lumbar disc herniation; 5) dysfunction or failure of the heart, lung, liver, kidney, or other major organ; 6) other serious disease or exercise contraindication; and 7) vibration training experience.

### **Sample size**

The sample size has been estimated using the G\*power statistical software (version 3.1.9.2 for Windows 7 X64; Franz Faul, Kiel University, Germany), used widely for this purpose. In this part of the study, the sample size was estimated by F tests: analysis of variance (ANOVA): related measures, between factors: computer required sample size. Under the significance level of 0.05 and repeated-measures ANOVA setting of 80% efficacy, the total number of subjects needed was determined to be 42 (14 per group). Considering a 20% loss rate, we plan to recruit 60 subjects (20 per group).

### **Randomization**

Numbers (1–60) will be assigned to the participants according to their recruitment times in an Excel software database, and then a random sequence will be generated using the "= rand ()" formula. This sequence will be sorted to allocate the participants to the study groups. These tasks will be completed by professional computer workers

blinded to recruitment and allocation after the completion of recruitment.

## Interventions

### *WBVT intervention*

Because the participants will be ill and weak, they will better accept low-frequency vibration training<sup>[33]</sup>, which has been shown to be more likely to induce changes in brain nerve excitation<sup>[Error! Bookmark not defined.]</sup>. The WBVT intervention will be implemented using a platform (I-vib5050A; Bodygreen, Taiwan) that generates vertical vibrations and has an adjustable frequency range (6–12 Hz) with corresponding preset amplitudes. The vibration frequency will be increased in a stepwise manner in three phases (weeks 1–4, 5–8, and 9–12) over the 12-week intervention period. The training will consist of adaptation to the vibration (6, 7, and 7 Hz, respectively, in phases 1–3) with 5 minutes of static standing, 1 minute of rest, two rounds of 5 minutes of rhythmic half-squat to standing practice (alternation of 60° knee flexion and standing for 5 seconds each) with vertical vibration (8, 10, and 12 Hz, respectively, in phases 1–3) and 1 minute rest between rounds, 5 minutes of vertical vibration (8, 10, and 12 Hz, respectively, in phases 1–3) under traction created by the placement of a ~4-cm-thick towel under the front sole of the foot to bend the patient's ankle back and pull the calf muscles with 1 minute rest between rounds, and a final 5 minutes of standing with vibration (6, 7, and 7 Hz, respectively, in phases 1–3). The amplitude will be maintained at 2 mm in all phases. The participants will be monitored continuously during training, and training will be terminated immediately upon complaint of any abnormal condition, such as panic, chest tightness, dizziness, or pain (Table 2).

**Table 2.** Vibration training schedule

| Time           | Vibration time<br>(min) | Schedule (min) | Vibration frequency<br>(Hz) |
|----------------|-------------------------|----------------|-----------------------------|
| Phase I        |                         |                |                             |
| Week 1 and 2   | 25                      | 5-5-5-5-5      | 6-8                         |
| Week 3 and 4   | 25                      | 5-5-5-5-5      | 6-8                         |
| Phase II       |                         |                |                             |
| Week 5 and 6   | 25                      | 5-5-5-5-5      | 7-10                        |
| Week 7 and 8   | 25                      | 5-5-5-5-5      | 7-10                        |
| Phase III      |                         |                |                             |
| Week 9 and 10  | 25                      | 5-5-5-5-5      | 7-12                        |
| Week 11 and 12 | 25                      | 5-5-5-5-5      | 7-12                        |

### *Routine rehabilitation exercise intervention*

The routine rehabilitation exercise intervention will consist of in-situ alternate leg lifting with the feet at shoulder width (while in a safe, stable position and with the help of both hands/arms), in-situ squatting (to 60–90°, increasingly gradually according to the patient's condition) with the feet at

1  
2  
3  
4  
5  
6  
7  
8  
9  
10  
11  
12  
13  
14  
15  
16  
17  
18  
19  
20  
21  
22  
23  
24  
25  
26  
27  
28  
29  
30  
31  
32  
33  
34  
35  
36  
37  
38  
39  
40  
41  
42  
43  
44  
45  
46  
47  
48  
49  
50  
51  
52  
53  
54  
55  
56  
57  
58  
59  
60

shoulder width (while holding a protective rod), in-situ heel lifting while on a step with the feet at shoulder width (while holding a protective rod), and walking on a treadmill equipped with safety handrails (Table 3). As the participants will be ill and weak, their exercise intensity will be monitored using the Borg scale (Table 4)<sup>[34]</sup>.

**Table 3. Routine rehabilitation training**

| Phase           | Exercise                      | Repetitions/duration                                                     |
|-----------------|-------------------------------|--------------------------------------------------------------------------|
| I: weeks 1–4    | Alternating in-situ leg lifts | 2 rounds of 30 s, inter-round interval to complete recovery              |
|                 | In-situ squats                | 2 rounds of 8–10 repetitions, inter-round interval to complete recovery  |
|                 | Step heel lifts               | 2 rounds of 15 repetitions, inter-round interval to complete recovery    |
|                 | Walking                       | 5 min                                                                    |
| II: weeks 5–8   | Alternating in-situ leg lifts | 3 rounds of 30 s, inter-round intervals to complete recovery             |
|                 | In-situ squats                | 3 rounds of 8–10 repetitions, inter-round intervals to complete recovery |
|                 | Step heel lifts               | 3 rounds of 15 repetitions, inter-round intervals to complete recovery   |
|                 | Walking                       | 10 min                                                                   |
| III: weeks 9–12 | Alternating in-situ leg lifts | 3 rounds of 30 s, inter-round intervals to complete recovery             |
|                 | In-situ squats                | 4 rounds of 8–10 repetitions, inter-round intervals to complete recovery |
|                 | Step heel lifts               | 4 rounds of 15 repetitions, inter-round intervals to complete recovery   |
|                 | Walking                       | 10 minutes                                                               |

**Table 4. Borg scale**

| Level | Description |
|-------|-------------|
|-------|-------------|

|    |                                                                                 |
|----|---------------------------------------------------------------------------------|
| 6  | No exertion at all                                                              |
| 7  | Extremely light                                                                 |
| 8  | Light                                                                           |
| 9  | Very light (easy, slow walking at a comfortable pace)                           |
| 10 | This is the effort level where you can't hear your breath                       |
| 11 | You are able to easily talk and you can run at this level for a long time       |
| 12 | Light (you are building aerobic endurance)                                      |
| 13 | Somewhat hard (you are making quite an effort; you feel tired but can continue) |
| 14 | You start to hear your breath, but are not gasping for air                      |
| 15 | You can talk, but it is more challenging, you use one- or two-word answers      |
| 16 | Hard (this is considered to be your steady state)                               |
| 17 | Very hard (very strenuous and you are very fatigued)                            |
| 18 | Your breathing is vigorous, you can't talk, you are gasping for air             |
| 19 | Extremely hard (you are counting the minutes until it ends)                     |
| 20 | Maximal exertion                                                                |

**Table 5. Intervention overview**

| Item no. | Brief name           | Group                                                                                                                                                                                          |                                                                                                                                                      |                                                                                                                                              |
|----------|----------------------|------------------------------------------------------------------------------------------------------------------------------------------------------------------------------------------------|------------------------------------------------------------------------------------------------------------------------------------------------------|----------------------------------------------------------------------------------------------------------------------------------------------|
|          |                      | WBVG                                                                                                                                                                                           | RRTG                                                                                                                                                 | CG                                                                                                                                           |
| 1        | Why                  | WBVT                                                                                                                                                                                           | Routine rehabilitation training                                                                                                                      | Control                                                                                                                                      |
| 2        | What                 | 12 weeks training under the guidance of professionals                                                                                                                                          |                                                                                                                                                      | Maintenance of usual living habits, no regular exercise, regular attendance of health lectures, telephone follow-up                          |
| 3        | What (content)       | 25 min exercise, five times/week                                                                                                                                                               |                                                                                                                                                      | Attendance of fortnightly health lectures, monthly telephone interviews                                                                      |
| 4        | What (procedure)     | Evaluation at baseline ,6 weeks and 12 weeks, and 4 and 8 weeks after intervention termination,reporting of results to participants so that they can understand the physical changes occurring |                                                                                                                                                      |                                                                                                                                              |
| 5        | Who (administrators) | WBVT coach is a professional rehabilitation physician, assessments performed by Shanghai University of Sport PhD students                                                                      | Routine rehabilitation training coach is a professional rehabilitation physician, assessments performed by Shanghai University of Sport PhD students | Health lectures and telephone interviews performed by Shanghai University of Sport PhD students (College of Physical Education and Training) |

|   |                   |                                                                                                                                                                                                                              |                                                                                                                                         |
|---|-------------------|------------------------------------------------------------------------------------------------------------------------------------------------------------------------------------------------------------------------------|-----------------------------------------------------------------------------------------------------------------------------------------|
| 6 | How               | The exercise interventions will take place in a stationary gymnasium, the instructors will direct the whole group face to face                                                                                               | The health lectures will be held in the conference room of the College of Physical Education and Training, Shanghai University of Sport |
| 7 | When and how much | See Table 2                                                                                                                                                                                                                  | See Table 3                                                                                                                             |
| 8 | How well          | Participants will receive regular feedback, including physical and psychological data and reports on their motor skills learning performance; they will be kept up to date on their progress and status to keep them engaged | Health lectures, 30–50 min; interviews, 10 min                                                                                          |

WBVG, whole-body vibration training group; RRTG, routine rehabilitation training group; CG, control group; WBVT, whole-body vibration training.

### Transcranial magnetic stimulation (TMS) protocol

#### Electromyographic recording

Surface electromyograms will be recorded from the rectus femoris (RF) muscle with 9-mm-diameter Ag-AgCl surface electrodes. The active and reference electrodes will be placed over the rectus femoris abdominis and above the patella, respectively (Figure 2). The signal will be amplified (1000×), bandpass filtered (2–2.5 kHz; Intronix Technologies Model), digitized at 5 kHz by an analog–digital interface (Micro1401; Cambridge Electronics Design, Cambridge, UK), and saved for offline analysis.

#### TMS

TMS will be applied to the bilateral M1 with a figure-of-eight-shaped coil (7-cm external loop diameter) connected to two single-pulse monophasic stimulators (Magstim Co., Whitland, Dyfed, UK). The M1 hotspot will be defined as the scalp location inducing the largest peak–peak MEP amplitude in the contralateral RF muscle. The handle of the test stimulus (TS) coil will be angled posteriorly 30–45° from the midsagittal line. TS1mV will be defined as the lowest TMS intensity required to generate MEPs of 1 mV in the relaxed RF muscle in at least 5 of 10 trials. The resting motor threshold (RMT) will be defined as the lowest TMS intensity required to generate MEPs > 50 V in at least 5 of 10 trials with the target muscle completely relaxed<sup>[35]</sup>.

#### Figure 2. EMG acquisition site.

#### Isokinetic strength assessment protocol

Due to the particularities of the participants' conditions, for safety reasons and based on previous isokinetic muscle strength research, the angular velocity for isokinetic strength testing in both lower limbs will 60°/s. The testing instrument will be warmed up and debugged before assessment. The assessment will be performed after an adaptability exercise with the participant's body fixed and his or her hands placed in front of the chest. The test action will be repeated five times with intervening 90-s rest

1  
2  
3 intervals. The average peak torque of the flexor and extensor muscles of the knee joint  
4 will be taken as the measure of strength. The peak torque is the gold-standard measure  
5 for isokinetic assessment, and has shown high degrees of accuracy and repeatability<sup>[36]</sup>.  
6  
7

## 8 **Outcomes**

### 9 **Primary outcome**

#### 10 ***Neural plasticity***

##### 11 *MEP amplitude*

12  
13 MEPs will be recorded during TMS. MEP amplitudes will be measured as peak-  
14 to-peak values.  
15  
16

##### 17 *Short-interval intracortical inhibition (SICI)*

18  
19 The intensity of the conditioned stimulus (CS) will be 1 mV, the TS intensity  
20 will be the RMT, and the interstimulus intervals (ISIs) will be 2, 3, and 4 ms. Before  
21 the experiment, the subjects' induced RF 1-mV MEP intensities will be measured as  
22 the TS intensities, and the CS intensities will be 80% RMT & 90% RMT. Each  
23 block will contain 40 trials in random order.  
24  
25

##### 26 *M1-pre-SMA connectivity*

27  
28 To investigate changes in connectivity between the left M1 and pre-SMA after  
29 long-term exercise training, we will perform TMS with two high-power Magstim 200  
30 devices and two figure-of-eight coil sites. Coil placement will be performed as in a  
31 similar hemispheric study to avoid overlap<sup>[37]</sup>. The smaller CS coil will be placed over  
32 the right hemisphere to induce a medially directed current in the brain, and will be used  
33 to stimulate the pre-SMA. The TS coil will be placed over the leg representation of the  
34 left hemisphere for the induction of a posterior–anterior current in the brain. The CS  
35 will be delivered by an octagonal coil (50-mm diameter) to stimulate the pre-SMA. Its  
36 intensity will be 110% or 90% of the RMT. The angle between the placement direction  
37 and the scalp midline will be 45° to induce a front-to-back current<sup>[38]</sup>. The TS (M1)  
38 intensity will be set to evoke a resting MEP with the same TMS coil. The ISIs will be  
39 6, 8, 10, 30, 40, and 50 ms. The strength of the CS will be changed for each block, and  
40 complete the order pseudo-random for each subject block. Each block will contain 60  
41 trials. Separate TS will be collected 10 times. The MEP of each ISI will be collected 10  
42 times, for a total of 70 measurements. Each block will contain 70 trials in random order.  
43  
44  
45  
46  
47  
48

#### 49 ***Lower-limb motor function***

##### 50 *Peak torque*

51  
52 Participants' lower-limb flexion and extension muscle strength will be evaluated  
53 using a PHYSIOMED Con-Trex isokinetic testing system at all assessment timepoints.  
54  
55

##### 56 *Brunnstrom stage*

57  
58 The Brunnstrom approach is a set of treatment methods for dyskinesia after central  
59 nervous system injury developed by Swedish physiotherapist Signe Brunnstrom. Motor  
60 function recovery is divided into six stages, with muscle tension increasing gradually

1  
2  
3 from low to high and joint reaction, joint movement, and spasm gradually becoming  
4 significant. With the completion of common motion, separation motion, and fine  
5 motion appear until they completely return to normal<sup>[39]</sup>.  
6  
7

### 8 *Fugl-Meyer assessment*

9  
10 Fugl-Meyer assessment (FMA) is a simplified, time-saving means of  
11 evaluating upper- and lower-limb motor function. The index comprises upper-  
12 limb (66 points) and lower-limb (34 points) items (total, 100 points). Higher  
13 scores reflect better functional recovery. FMA scores can be used to  
14 characterize the severity of dyskinesia in stroke patients. Only the lower-limb  
15 FMA items will be applied in this study. The passive range of motion of each  
16 joint of each participant will be determined before FMA. During the assessment,  
17 the non-hemiplegic side will be evaluated first, followed by the hemiplegic  
18 side<sup>[40]</sup>.  
19  
20  
21  
22

### 23 *Timed up-and-go test*

24 The timed up-and-go test is used to assess patients' mobility, balance,  
25 walking ability, and fall risk. The participant will sit in a standard armchair  
26 with his or her back touching the chair and arms on the armrests. Assistive  
27 devices for walking will be placed near the chair. He or she will then be asked  
28 to walk to a sign placed at a distance of 3 m at a safe and normal speed, turn  
29 around, walk back to the chair, and sit down. The test is complete when the  
30 participant's hip touches the seat, and the time taken to complete it (in seconds)  
31 will be recorded<sup>[41]</sup>.  
32  
33  
34  
35

### 36 *Berg balance test*

37 The Berg balance test includes 14 actions, with performance scored on a  
38 0–4 scale (total possible score, 56). Higher scores reflect better balance  
39 function. Scores of 0–20 indicate that a patient is safe with wheelchair use,  
40 scores of 21–40 indicate that the patient should use an assistive device to walk,  
41 and scores of 41–56 indicate that the patient can walk independently; thus,  
42 scores < 40 indicate a fall risk<sup>[42]</sup>.  
43  
44  
45

## 46 **Secondary outcomes**

### 47 SF-36

48 It is also called health survey brief table. It comprehensively summarizes the  
49 quality of life of the respondents from eight aspects: physiological function,  
50 physiological function and mental health. In addition to the above eight aspects,  
51 SF-36 also includes another health indicator: HT: reported health transition,  
52 which is used to evaluate the overall change of health status in the past year.  
53 Evaluation method: the higher the score of each item, the better the health  
54 status<sup>[39]</sup>.  
55  
56  
57  
58

### 59 MOCA cognitive assessment



The scale will comprehensively evaluate the cognitive function of patients from the aspects of visual space and executive function, naming, memory, attention and language fluency. The full score of the scale is 30 points,  $\geq 26$  points are normal, 18-26 points are mild cognitive impairment, 10-17 points are moderate cognitive impairment, and less than 10 points are moderate cognitive impairment. If the subject's years of education  $\leq 12$  years (high school level), the result can be added by 1 point, but the total score cannot exceed 30 points<sup>[43]</sup>.

### Patients and public involvement

Participants have not been involved in the study recruitment. The author conceived the initial research questions and outcome measures, and modified according to the telephone interviews with patients and their guardians by a research assistant. In order to assure the safety and feasibility of the intervention, we invited ten stroke patients to learn and practise the whole body vibration training and routine rehabilitation training before designing the RCT. Whole body vibration training and routine rehabilitation training were revised based on the exercise performance and feedback provided by the participants. The burden of the intervention will be assessed by patients and their advisors through face-to-face interviews before signing informed consent. The findings of the study will be disseminated to the participants and their guardians.

### Statistical analysis

The statistical analysis will be performed by designated members of the research group who will be blinded to participants' group allocations. All statistical analyses will be conducted using IBM SPSS 24.0. All quantitative data will be summarized and presented using appropriate descriptive statistics, and baseline data from the WBVG, RRTG and CG will be analyzed using the independent-samples *t* test. To explore the effects of the training interventions on stroke patients' motor function and neural plasticity, repeated-measures analysis of variance will be used to examine differences in outcomes between and within groups at all assessment timepoints (Table 6).

**Table 6.** Overview of the analysis of differences among study groups

|      | Group                  | Baseline | 12 weeks | 4 weeks after intervention | F (P value) Group effect | F (P value) Interaction effect |
|------|------------------------|----------|----------|----------------------------|--------------------------|--------------------------------|
| FMA  | WBVT<br>RRT<br>Control |          |          |                            |                          |                                |
| TUG  | WBVT<br>RRT<br>Control |          |          |                            |                          |                                |
| Berg | WBVT<br>RRT            |          |          |                            |                          |                                |



|               |         |  |  |  |  |  |
|---------------|---------|--|--|--|--|--|
|               | Control |  |  |  |  |  |
| Brunnstrom    | WBVT    |  |  |  |  |  |
|               | RRT     |  |  |  |  |  |
|               | Control |  |  |  |  |  |
| Peak torque   | WBVT    |  |  |  |  |  |
|               | RRT     |  |  |  |  |  |
|               | Control |  |  |  |  |  |
| Mep amplitude | WBVT    |  |  |  |  |  |
|               | RRT     |  |  |  |  |  |
|               | Control |  |  |  |  |  |
| SICI          | WBVT    |  |  |  |  |  |
|               | RRT     |  |  |  |  |  |
|               | Control |  |  |  |  |  |
| M1-pre- SMA   | WBVT    |  |  |  |  |  |
|               | RRT     |  |  |  |  |  |
|               | Control |  |  |  |  |  |
| MoCA          | WBVT    |  |  |  |  |  |
|               | RRT     |  |  |  |  |  |
|               | Control |  |  |  |  |  |
| SF-36         | WBVT    |  |  |  |  |  |
|               | RRT     |  |  |  |  |  |
|               | Control |  |  |  |  |  |

## ETHICS AND DISSEMINATION

All individuals who meet the study criteria will be required to sign an informed consent from prior to enrollment in the study. This study protocol has been approved by the Shanghai University of Sport Research Ethics Committee (102772021RT067). Study findings will be disseminated via publication in peer-reviewed journals and presentations at international conferences.

Funding: This study was supported by grants from the Research supported by The Program for Overseas High-level talents at Shanghai Institutions of Higher Learning (TP2020063)

## Contributorship statement

Mingkai Zhang: Data curation, Writing- Original draft preparation, Writing- Reviewing and Editing. Jianing Wei: Visualization, Investigation. Xueping Wu: Conceptualization, Methodology, Software. Priya.

## REFERENCES

- [1] Benjamin EJ, Virani SS, Callaway CW, *et al.* Heart disease and stroke statistics-2018 update: a report from the American heart association. *Circulation* ,2018;137:e67–492.doi:10.1161/CIR.0000000000000558
- [2]"Brief report on stroke prevention and treatment in China,2019." *Chinese Journal of Cerebrovascular Disease* ,17.05(2020):272-281. doi:CNKI:SUN:NXGB.0.2020-05-009.
- [3] Wist, S. , J. Clivaz , and M. Sattelmayer . "Muscle strengthening for hemiparesis after stroke: A meta-analysis." *Annals of Physical & Rehabilitation Medicine* (2016):114-124.doi:10.1016/j.rehab.2016.02.001.
- [4]Yulian Zhu.*Effects of Modified Constraint-induced Movement Therapyon Walking Ability and Gait in Stroke Patients with Hemiplegic.*2016.Shanghai University of Sport,PhD dissertation.
- [5] Broderick, P. , *et al.* "Mirror therapy for improving lower limb motor function and mobility after stroke: A systematic review and meta-analysis." *Gait & Posture* (2018): 63: 208-220.doi: 10.1016/j.gaitpost.2018.05.017.
- [6] Ramsay, J. W. , *et al.* "Paretic muscle atrophy and non-contractile tissue content in individual muscles of the post-stroke lower extremity." *Journal of Biomechanics* 44.16(2011):2741-2746.doi:10.1016/j.jbiomech.2011.09.001.
- [7] Oh, D. S. , and J. D. Choi . "The effect of motor imagery training for trunk movements on trunk muscle control and proprioception in stroke patients." *Journal of Physical Therapy Science* 29.7(2017):1224-1228.doi:10.1598/jpts.29.1224.
- [8] Kline, T. L. , B. D. Schmit , and D. G. Kamper . "Exaggerated interlimb neural coupling following stroke." *Brain A Journal of Neurology* 1:159-169.doi:10.1093/brain/awl278.
- [9] Fulk, G. D. , *et al.* "Estimating Clinically Important Change in Gait Speed in People With Stroke Undergoing Outpatient Rehabilitation." *Journal of Neurologic Physical Therapy* 35.2(2011):82-89.doi:10.1097/NPT.0b013e318218e2f2.
- [10] Yali Liang.*Effect of Pro Kin balance training combined with suspension training on lower limb motor function of stroke patients.*2021.Shengyang Sports University,MA thesis.
- [11] Longfeng Qi.*Effects of repetitive transcranial magnetic stimulation on lower extremity motor function in patients after stroke.*2019.Qingdao University,MA thesis.
- [12] Liang, *et al.* "Dynamic functional reorganization of the motor execution network after stroke." *Brain: A Journal of Neurology* 133.4(2010):1224-1238.doi:10.1093/brain/awq043.
- [13] Corti, M. . "Repetitive transcranial magnetic stimulation of motor cortex after stroke: a focused review." *American Journal of Physical Medicine & Rehabilitation* 91.3(2012):254-270.doi:10.1097/PHM.0b013e318228bf0c
- [14] Graziano, Msa , and T. N. Aflalo . "Mapping Behavioral Repertoire onto the Cortex." *Neuron* 56.2(2007):239-251.doi:10.1016/j.neuron.2007.09.013
- [15] Jue Wang.*TMS modulation effect : Individualized precise- localization of hand motor area and evaluation of its aftereffect.*2020.Shanghai University of Sport,PhD dissertation.
- [16] Nachev, P. , *et al.* "The role of the pre-supplementary motor area in the control of action." *NeuroImage* 36(2007):T155-T163.doi: 10.1016/j.neuroimage.2007.03.034
- [17] Tzika, and Aria. "fMRI as a molecular imaging procedure for the functional reorganization of motor systems in chronic stroke." *Molecular Medicine Reports* 8.3(2013):775-779.doi: 10.3892/mmr.2013.1603.
- [18] Yongjun Wang, *et al.*"China stroke report 2019 (Chinese version) ( 1 ) ." *Chinese Journal of Stroke* 15.10(2020):1037-1043. doi:CNKI:SUN:ZUZH.0.2020-10-001.
- [19] Ward NS, Cohen LG. Mechanisms underlying recovery of motor function after stroke. *Arch Neurol.* 2004;61:1844-1848.doi: 10.1111/j.1398-9995.2007.01342.x.
- [20] Classen, J. , *et al.* "Rapid plasticity of human cortical movement representation induced by practice." *Journal of Neurophysiology* 79.2(1998):1117-23.doi:10.1007/s002329900335
- [21] Zheng, G. Z. , and M. Chopp . "Neurorestorative therapies for stroke: underlying mechanisms and translation to the clinic." *Lancet Neurology* 8.5(2009):491-500.doi:10.1016/S1474-4422(09)70061-4
- [22] Lo, Suzanne Hoi Shan, *et al.* "Feasibility of a ballet-inspired low-impact at-home workout

- programme for adults with stroke: a mixed-methods exploratory study protocol." *BMJ open* 11.4 (2021): e045064.doi:10.1136/bmjopen-2020-045064
- [23] Huang, Meizhen, et al. "Whole-body vibration modulates leg muscle reflex and blood perfusion among people with chronic stroke: a randomized controlled crossover trial." *Scientific reports* 10.1 (2020): 1-11.doi:10.1038/s41598-020-58479-5
- [24] Celletti, Claudia, et al. "Promoting post-stroke recovery through focal or whole body vibration: criticisms and prospects from a narrative review." *Neurological Sciences* 41.1 (2020): 11-24.doi:10.1007/s10072-019-04047-3
- [25] Chan, K. S. , et al. "Effects of a single session of whole body vibration on ankle plantarflexion spasticity and gait performance in patients with chronic stroke: a randomized controlled trial." *Clinical Rehabilitation* 26.12(2012):1087.doi:10.1177/0269215512446314
- [26] Hilgers, C. , et al. "Effects of whole-body vibration training on physical function in patients with Multiple Sclerosis." *Neurorehabilitation* 32.3(2013):655-663.doi:10.3233/NRE-130888
- [27] El-Shamy, S. M. . "Effect of whole-body vibration on muscle strength and balance in diplegic cerebral palsy: a randomized controlled trial." *Am J Phys Med Rehabil* 93.2(2014):114-121.doi:10.1097/PHM.0b013e3182a541a4
- [28] Murillo, N. , et al. "Focal vibration in neurorehabilitation." *European journal of physical and rehabilitation medicine* 50.2(2014):231-242.doi:10.1186/1743-0003-11-47
- [29] Liao, Lin-Rong, et al. "Cardiovascular stress induced by whole-body vibration exercise in individuals with chronic stroke." *Physical therapy* 95.7 (2015): 966-977.doi:10.2522/ptj.20140295
- [30] Alashram, Anas R., Elvira Padua, and Giuseppe Annino. "Effects of whole-body vibration on motor impairments in patients with neurological disorders: a systematic review." *American journal of physical medicine & rehabilitation* 98.12(2019): 1084-1098. doi:10.1097/PHM.0000000000001252
- [31] Binder, Christian, Ali Ekber Kaya, and Joachim Liepert. "Vibration prolongs the cortical silent period in an antagonistic muscle." *Muscle & Nerve: Official Journal of the American Association of Electrodiagnostic Medicine* 39.6 (2009): 776-780.doi:10.1002/mus.21240
- [32] Marconi, B. , et al. "Long-term effects on cortical excitability and motor recovery induced by repeated muscle vibration in chronic stroke patients." *Neurorehabil Neural Repair* 122.1(2011):48-60.doi:10.1177/1545968310376757
- [33] Issurin, V. B. , and G. Tenenbaum . "Acute and residual effects of vibratory stimulation on explosive strength in elite and amateur athletes." *Journal of Sports Sciences* 17.3(1999):177-182.doi:10.1080/026404199366073
- [34] Kamps, A., and K. Schüle. "Cyclic movement training of the lower limb in stroke rehabilitation." *Neurol Rehabil* 11.5 (2005): 1-12.doi:http://dx.doi.org/
- [35] O'Shea, Jacinta, et al. "Functional specificity of human premotor-motor cortical interactions during action selection." *European Journal of Neuroscience* 26.7 (2007): 2085-2095.doi: 10.1111/j.1460-9568.2007.05795.x
- [36] Pontes, Sarah Souza, et al. "Effects of isokinetic muscle strengthening on muscle strength, mobility, and gait in post-stroke patients: a systematic review and meta-analysis." *Clinical rehabilitation* 33.3 (2019): 381-394.doi:10.1177/0269215518815220
- [37] Zheng, Y. , et al. "Selective serotonin reuptake inhibition modulates response inhibition in Parkinson's disease." *Brain* 137.4(2014):1145-1155. doi:10.1093/brain/awu032
- [38] Wang, Yanqiu, et al. "Hemispheric Differences in Functional Interactions Between the Dorsal Lateral Prefrontal Cortex and Ipsilateral Motor Cortex." *Frontiers in Human Neuroscience* 14 (2020): 202. doi:10.3389/fnhum.2020.00202
- [39] Farrell Iii, John W., Jordan Merkas, and Lara A. Pilutti. The Effect of Exercise Training on Gait, Balance, and Physical Fitness Asymmetries in Persons With Chronic Neurological Conditions: A Systematic Review of Randomized Controlled Trials[J].*Frontiers in Physiology* 2020, 11: 1316.doi:10.3389/fphys.2020.585765
- [40] Fernandez-Gonzalo, Rodrigo, et al. "Muscle, functional and cognitive adaptations after flywheel resistance training in stroke patients: a pilot randomized controlled trial." *Journal of neuroengineering and rehabilitation* 13.1 (2016): 1-11.doi:10.1186/s12984-016-0144-7
- [41] Munari, Daniele, et al. "High-intensity treadmill training improves gait ability, VO<sub>2</sub>peak and

1  
2  
3  
4  
5  
6  
7  
8  
9  
10  
11  
12  
13  
14  
15  
16  
17  
18  
19  
20  
21  
22  
23  
24  
25  
26  
27  
28  
29  
30  
31  
32  
33  
34  
35  
36  
37  
38  
39  
40  
41  
42  
43  
44  
45  
46  
47  
48  
49  
50  
51  
52  
53  
54  
55  
56  
57  
58  
59  
60

---

cost of walking in stroke survivors: preliminary results of a pilot randomized controlled trial." *Eur J Phys Rehabil Med* 54.3 (2018): 408-418.doi:10.23736/S1973-9087.16.04224-6

[42] Gordon, C. D. , R. Wilks , and A. Mccaw-Binns . "Effect of aerobic exercise (walking) training on functional status and health-related quality of life in chronic stroke survivors: a randomized controlled trial. " *Stroke* 44.4(2013):1179-1181.doi: 10.1161/STROKEAHA.111.000642

[43] Gao F. *The application of MoCA test and DTI in mild cognitive impairment*. Diss. MA thesis. PLA Military Medical Training College, 2008.

1  
2  
3  
4  
5  
6  
7  
8  
9  
10  
11  
12  
13  
14  
15  
16  
17  
18  
19  
20  
21  
22  
23  
24  
25  
26  
27  
28  
29  
30  
31  
32  
33  
34  
35  
36  
37  
38  
39  
40  
41  
42  
43  
44  
45  
46  
47  
48  
49  
50  
51  
52  
53  
54  
55  
56  
57  
58  
59  
60

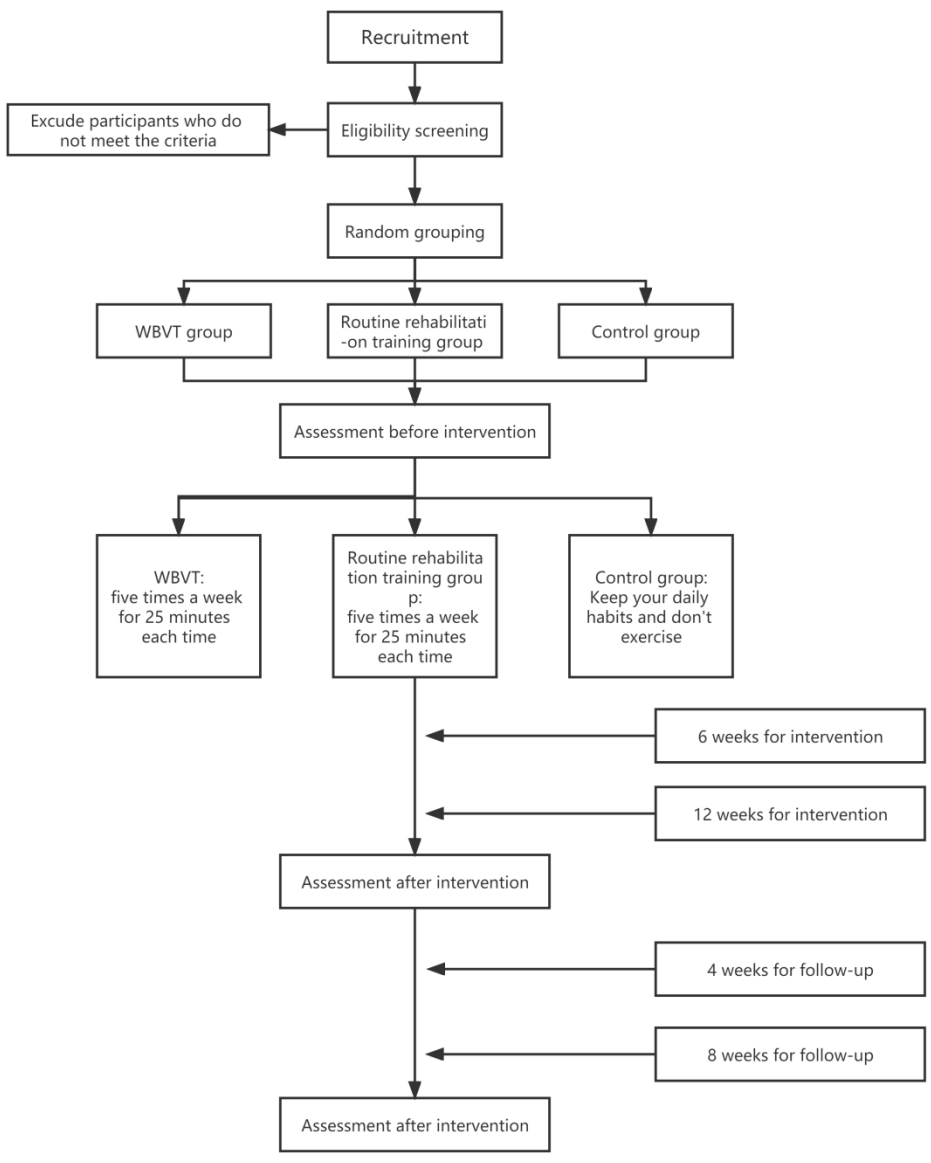

Figure 1

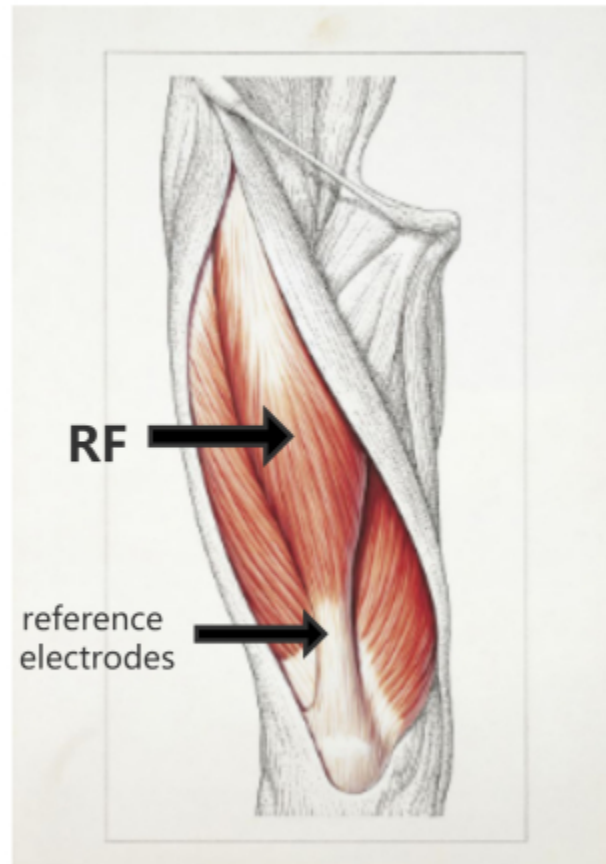

Figure 2 EMG acquisition site

69x86mm (144 x 144 DPI)

1  
2  
3  
4  
5  
6  
7  
8  
9  
10  
11  
12  
13  
14  
15  
16  
17  
18  
19  
20  
21  
22  
23  
24  
25  
26  
27  
28  
29  
30  
31  
32  
33  
34  
35  
36  
37  
38  
39  
40  
41  
42  
43  
44  
45  
46  
47  
48  
49  
50  
51  
52  
53  
54  
55  
56  
57  
58  
59  
60

Figure Legends

Figure 1 Diagram of study flow

Figure 2 EMG acquisition site

Surface electromyograms will be recorded from the rectus femoris (RF) muscle with 9-mm-diameter Ag-AgCl surface electrodes. The active and reference electrodes will be placed over the rectus femoris abdominis and above the patella, respectively

For peer review only

# Reporting checklist for protocol of a clinical trial.

Based on the SPIRIT guidelines.

## Instructions to authors

Complete this checklist by entering the page numbers from your manuscript where readers will find each of the items listed below.

Your article may not currently address all the items on the checklist. Please modify your text to include the missing information. If you are certain that an item does not apply, please write "n/a" and provide a short explanation.

Upload your completed checklist as an extra file when you submit to a journal.

In your methods section, say that you used the SPIRIT reporting guidelines, and cite them as:

Chan A-W, Tetzlaff JM, Gøtzsche PC, Altman DG, Mann H, Berlin J, Dickersin K, Hróbjartsson A, Schulz KF, Parulekar WR, Krleža-Jerić K, Laupacis A, Moher D. SPIRIT 2013 Explanation and Elaboration: Guidance for protocols of clinical trials. *BMJ*. 2013;346:e7586

|                                   | Reporting Item                                                                                                                                                                           | Page Number |
|-----------------------------------|------------------------------------------------------------------------------------------------------------------------------------------------------------------------------------------|-------------|
| <b>Administrative information</b> |                                                                                                                                                                                          |             |
| Title                             | <a href="#">#1</a> Effects of whole-body vibration training on lower-limb motor function and neural plasticity in stroke patients: protocol for a randomized controlled clinical trial   | 3           |
| Trial registration                | <a href="#">#2a</a> This study has been registered prospectively in the Chinese Clinical Trial Registry(ChiCTR2200055143)                                                                | 3           |
| Trial registration: data set      | <a href="#">#2b</a> 2022.1-2023.5                                                                                                                                                        |             |
| Protocol version                  | <a href="#">#3</a> 2022.3-2022.10                                                                                                                                                        |             |
| Funding                           | <a href="#">#4</a> This study was supported by grants from the Research supported by The Program for Overseas High-level talents at Shanghai Institutions of Higher Learning (TP2020063) | 16          |
| Roles and                         | <a href="#">#5a</a> Mingkai Zhang:Data curation, Writing- Original draft                                                                                                                 | 16          |



responsibilities: preparation, Writing- Reviewing and Editing.

contributorship

Roles and [#5b](#)

responsibilities:

sponsor contact

information

Roles and [#5c](#)

responsibilities:

sponsor and funder

Roles and [#5d](#)

responsibilities:

committees

Jianing Wei: Visualization, Investigation. Xueping

Wu: Conceptualization, Methodology, Software/Priya.

16

## Introduction

Background and [#6a](#)

rationale

Stroke is prevalent and associated with high disability, recurrence, 3

and mortality rates. Stroke patients often have a variety of sequelae. The most common is hemiplegia, which is characterized by numbness and weakness of one limb and continuous increases in muscle tension. The improvement of affected patients' muscle strength, balance, and walking ability is key to the improvement of their lower-limb motor function. Changes in neural plasticity after stroke have been shown to be the basis for the recovery of motor function.

Changes in neural plasticity after stroke have been shown to be the basis for the recovery of motor function. In addition to improving muscle strength and joint activity, exercise intervention therapy can aid the recovery of neural plasticity and brain function, thereby promoting the recovery of motor function. The key to effective rehabilitation is to give patients greater motor stimulation within their limited range of activities.

As a passive training method, whole-body vibration training (WBVT) involves the generation of mechanical waves through a training platform to stimulate muscle vibration and neuromuscular regulation and adaptation. It has also been found to effectively improve the lower-limb muscle strength, spasm, walking ability, and balance of many people, including stroke patients.

|    |                           |                      |                                                                      |   |
|----|---------------------------|----------------------|----------------------------------------------------------------------|---|
| 1  | Background and            | <a href="#">#6b</a>  |                                                                      |   |
| 2  | rationale: choice of      |                      |                                                                      |   |
| 3  | comparators               |                      |                                                                      |   |
| 4  |                           |                      |                                                                      |   |
| 5  |                           |                      |                                                                      |   |
| 6  | Objectives                | <a href="#">#7</a>   | We aim to determine the effect of 12 weeks of WBVT on stroke         | 6 |
| 7  |                           |                      | patients' lower-limb motor function and neural plasticity, and       |   |
| 8  |                           |                      | explore the difference between wbvt and routine rehabilitation       |   |
| 9  |                           |                      | training after 6 and 12 weeks of training. In addition, we will      |   |
| 10 |                           |                      | evaluate and compare it after 4 and 8 weeks of stopping training.    |   |
| 11 |                           |                      | We will also assess the feasibility of a future full-scale RCT.      |   |
| 12 |                           |                      |                                                                      |   |
| 13 |                           |                      |                                                                      |   |
| 14 |                           |                      |                                                                      |   |
| 15 |                           |                      |                                                                      |   |
| 16 | Trial design              | <a href="#">#8</a>   | This study was designed as a prospective single-blind RCT.           | 6 |
| 17 |                           |                      | Eligible participants with stroke will be assigned randomly to the   |   |
| 18 |                           |                      | whole-body vibration training group (WBVG), routine                  |   |
| 19 |                           |                      | rehabilitation training group (RRTG), and control group (CG) at a    |   |
| 20 |                           |                      | ratio of 1:1:1. The WBVG and RRTG will receive exercise              |   |
| 21 |                           |                      | interventions in the Sports Laboratory of Shanghai University of     |   |
| 22 |                           |                      | Sport, Shanghai, China. The CG will maintain their routine daily     |   |
| 23 |                           |                      | lives. The interventions will be implemented 5 times a week for      |   |
| 24 |                           |                      | 12 weeks. Participants will be evaluated at baseline, after 6 and 12 |   |
| 25 |                           |                      | weeks of intervention, and 4 and 8 weeks after intervention          |   |
| 26 |                           |                      | termination                                                          |   |
| 27 |                           |                      |                                                                      |   |
| 28 |                           |                      |                                                                      |   |
| 29 |                           |                      |                                                                      |   |
| 30 |                           |                      |                                                                      |   |
| 31 |                           |                      |                                                                      |   |
| 32 |                           |                      |                                                                      |   |
| 33 | <b>Methods:</b>           |                      |                                                                      |   |
| 34 | <b>Participants,</b>      |                      |                                                                      |   |
| 35 | <b>interventions, and</b> |                      |                                                                      |   |
| 36 | <b>outcomes</b>           |                      |                                                                      |   |
| 37 |                           |                      |                                                                      |   |
| 38 |                           |                      |                                                                      |   |
| 39 |                           |                      |                                                                      |   |
| 40 | Study setting             | <a href="#">#9</a>   | Shanghai university of sport, Shanghai, China                        |   |
| 41 |                           |                      |                                                                      |   |
| 42 | Eligibility criteria      | <a href="#">#10</a>  | 1) clinical diagnosis of first ischemic or hemorrhagic stroke, 2)    | 7 |
| 43 |                           |                      | Montreal Cognitive Assessment (MoCA) score > 20, 3)                  |   |
| 44 |                           |                      | Brunnstrom stage III or IV, 4) ability to stand and walk without     |   |
| 45 |                           |                      | the help of another person, 5) stable medical condition, and 6)      |   |
| 46 |                           |                      | duration of illness ≥ 6 months                                       |   |
| 47 |                           |                      |                                                                      |   |
| 48 |                           |                      |                                                                      |   |
| 49 |                           |                      |                                                                      |   |
| 50 |                           |                      |                                                                      |   |
| 51 | Interventions:            | <a href="#">#11a</a> | <b>Table 2.</b> Vibration training schedule                          | 8 |
| 52 | description               |                      |                                                                      |   |
| 53 |                           |                      | <b>Table 3.</b> Routine rehabilitation training                      |   |
| 54 |                           |                      |                                                                      |   |
| 55 |                           |                      | <b>Table 5.</b> Intervention overview                                |   |
| 56 |                           |                      |                                                                      |   |
| 57 |                           |                      |                                                                      |   |
| 58 |                           |                      |                                                                      |   |
| 59 |                           |                      |                                                                      |   |
| 60 |                           |                      |                                                                      |   |

|    |                      |                      |                                                                      |    |
|----|----------------------|----------------------|----------------------------------------------------------------------|----|
| 1  | Interventions:       | <a href="#">#11b</a> | <b>Table 5.</b> Intervention overview                                | 10 |
| 2  | modifications        |                      |                                                                      |    |
| 3  |                      |                      |                                                                      |    |
| 4  |                      |                      |                                                                      |    |
| 5  | Interventions:       | <a href="#">#11c</a> | <b>Table 5.</b> Intervention overview                                | 10 |
| 6  | adherence            |                      |                                                                      |    |
| 7  |                      |                      |                                                                      |    |
| 8  |                      |                      |                                                                      |    |
| 9  |                      |                      |                                                                      |    |
| 10 | Interventions:       | <a href="#">#11d</a> | <b>Table 5.</b> Intervention overview                                | 10 |
| 11 | concomitant care     |                      |                                                                      |    |
| 12 |                      |                      |                                                                      |    |
| 13 |                      |                      |                                                                      |    |
| 14 |                      |                      |                                                                      |    |
| 15 | Outcomes             | <a href="#">#12</a>  | <b>Neural plasticity:</b> MEP amplitude,Short-interval intracortical | 12 |
| 16 |                      |                      | inhibition (SICI) ,M1-pre-SMA connectivity                           |    |
| 17 |                      |                      |                                                                      |    |
| 18 |                      |                      |                                                                      |    |
| 19 |                      |                      | <b>Lower-limb motor function:</b> Peak torque,Brunnstrom             |    |
| 20 |                      |                      | stage,Fugl-Meyer assessment,Timed up-and-go test,Berg                |    |
| 21 |                      |                      | balance test,36-item Short Form Survey                               |    |
| 22 |                      |                      |                                                                      |    |
| 23 |                      |                      |                                                                      |    |
| 24 |                      |                      |                                                                      |    |
| 25 |                      |                      |                                                                      |    |
| 26 |                      |                      |                                                                      |    |
| 27 |                      |                      |                                                                      |    |
| 28 |                      |                      |                                                                      |    |
| 29 |                      |                      |                                                                      |    |
| 30 |                      |                      |                                                                      |    |
| 31 |                      |                      |                                                                      |    |
| 32 |                      |                      |                                                                      |    |
| 33 |                      |                      |                                                                      |    |
| 34 |                      |                      |                                                                      |    |
| 35 |                      |                      |                                                                      |    |
| 36 |                      |                      |                                                                      |    |
| 37 |                      |                      |                                                                      |    |
| 38 |                      |                      |                                                                      |    |
| 39 |                      |                      |                                                                      |    |
| 40 |                      |                      |                                                                      |    |
| 41 |                      |                      |                                                                      |    |
| 42 |                      |                      |                                                                      |    |
| 43 |                      |                      |                                                                      |    |
| 44 |                      |                      |                                                                      |    |
| 45 |                      |                      |                                                                      |    |
| 46 |                      |                      |                                                                      |    |
| 47 | Participant timeline | <a href="#">#13</a>  | This study was designed as a prospective single-blind RCT.           | 6  |
| 48 |                      |                      | Eligible participants with stroke will be assigned randomly to the   |    |
| 49 |                      |                      | whole-body vibration training group (WBVG), routine                  |    |
| 50 |                      |                      | rehabilitation training group (RRTG), and control group (CG) at a    |    |
| 51 |                      |                      | ratio of 1:1:1. The WBVG and RRTG will receive exercise              |    |
| 52 |                      |                      | interventions in the Sports Laboratory of Shanghai University of     |    |
| 53 |                      |                      | Sport, Shanghai, China. The CG will maintain their routine daily     |    |
| 54 |                      |                      | lives. The interventions will be implemented 5 times a week for      |    |
| 55 |                      |                      |                                                                      |    |
| 56 |                      |                      |                                                                      |    |
| 57 |                      |                      |                                                                      |    |
| 58 |                      |                      |                                                                      |    |
| 59 |                      |                      |                                                                      |    |
| 60 |                      |                      |                                                                      |    |

12 weeks. Participants will be evaluated at baseline, after 6 and 12 weeks of intervention, and 4 and 8 weeks after intervention termination

|                                                                                         |             |                     |                                                                                                                                                                                                                                                                                                                                                                                                                                                                                                                                                                                                           |   |
|-----------------------------------------------------------------------------------------|-------------|---------------------|-----------------------------------------------------------------------------------------------------------------------------------------------------------------------------------------------------------------------------------------------------------------------------------------------------------------------------------------------------------------------------------------------------------------------------------------------------------------------------------------------------------------------------------------------------------------------------------------------------------|---|
| 5<br>6<br>7<br>8<br>9<br>10<br>11<br>12<br>13<br>14<br>15<br>16<br>17<br>18<br>19<br>20 | Sample size | <a href="#">#14</a> | The sample size has been estimated using the G*power statistical software (version 3.1.9.2 for Windows 7 X64; Franz Faul, Kiel University, Germany), used widely for this purpose. In this part of the study, the sample size was estimated by F tests: analysis of variance (ANOVA): related measures, between factors: computer required sample size. Under the significance level of 0.05 and repeated-measures ANOVA setting of 80% efficacy, the total number of subjects needed was determined to be 42 (14 per group). Considering a 20% loss rate, we plan to recruit 60 subjects (20 per group). | 8 |
| 21<br>22<br>23<br>24<br>25<br>26<br>27                                                  | Recruitment | <a href="#">#15</a> | Participants in Shanghai will be recruited through community outreach, from outpatient clinics, with media advertising, and by telephone. All participants will follow their routine medication and physical therapy/massage regimens during the study period                                                                                                                                                                                                                                                                                                                                             | 7 |

28 **Methods:**  
29 **Assignment of**  
30 **interventions (for**  
31 **controlled trials)**

|                                                                                                                                  |                                  |                      |                                                                                                                                                                                                                                                                                                                                                                                                                                                                                                                                                                                                                                                                                                                                         |   |
|----------------------------------------------------------------------------------------------------------------------------------|----------------------------------|----------------------|-----------------------------------------------------------------------------------------------------------------------------------------------------------------------------------------------------------------------------------------------------------------------------------------------------------------------------------------------------------------------------------------------------------------------------------------------------------------------------------------------------------------------------------------------------------------------------------------------------------------------------------------------------------------------------------------------------------------------------------------|---|
| 32<br>33<br>34<br>35<br>36<br>37<br>38<br>39<br>40<br>41<br>42<br>43<br>44<br>45<br>46<br>47<br>48<br>49<br>50<br>51<br>52<br>53 | Allocation: sequence generation  | <a href="#">#16a</a> | This study was designed as a prospective single-blind RCT. Eligible participants with stroke will be assigned randomly to the whole-body vibration training group (WBVG), routine rehabilitation training group (RRTG), and control group (CG) at a ratio of 1:1:1. The WBVG and RRTG will receive exercise interventions in the Sports Laboratory of Shanghai University of Sport, Shanghai, China. The CG will maintain their routine daily lives. Numbers (1–60) will be assigned to the participants according to their recruitment times in an Excel software database, and then a random sequence will be generated using the "= rand ()" formula. This sequence will be sorted to allocate the participants to the study groups. | 8 |
| 54<br>55<br>56<br>57<br>58<br>59<br>60                                                                                           | Allocation concealment mechanism | <a href="#">#16b</a> | This study was designed as a prospective single-blind RCT. Eligible participants with stroke will be assigned randomly to the whole-body vibration training group (WBVG), routine rehabilitation training group (RRTG), and control group (CG) at a                                                                                                                                                                                                                                                                                                                                                                                                                                                                                     | 8 |

ratio of 1:1:1. The WBVG and RRTG will receive exercise interventions in the Sports Laboratory of Shanghai University of Sport, Shanghai, China. The CG will maintain their routine daily lives. Numbers (1–60) will be assigned to the participants according to their recruitment times in an Excel software database, and then a random sequence will be generated using the "= rand ()" formula. This sequence will be sorted to allocate the participants to the study groups.

|    |                                                                       |                      |                                                                                                                                                                                                                                                                                                                                                                                                                                                                                                                                |
|----|-----------------------------------------------------------------------|----------------------|--------------------------------------------------------------------------------------------------------------------------------------------------------------------------------------------------------------------------------------------------------------------------------------------------------------------------------------------------------------------------------------------------------------------------------------------------------------------------------------------------------------------------------|
| 13 | Allocation:                                                           | <a href="#">#16c</a> |                                                                                                                                                                                                                                                                                                                                                                                                                                                                                                                                |
| 14 | implementation                                                        |                      |                                                                                                                                                                                                                                                                                                                                                                                                                                                                                                                                |
| 17 | Blinding (masking)                                                    | <a href="#">#17a</a> | The data is analyzed by specialized PhD students, they analyse the data be blind to group allocation.                                                                                                                                                                                                                                                                                                                                                                                                                          |
| 23 | Blinding (masking):<br>emergency<br>unblinding                        | <a href="#">#17b</a> | After the results are processed, the grouping can be announced                                                                                                                                                                                                                                                                                                                                                                                                                                                                 |
| 28 | <b>Methods: Data<br/>collection,<br/>management, and<br/>analysis</b> |                      |                                                                                                                                                                                                                                                                                                                                                                                                                                                                                                                                |
| 35 | Data collection plan                                                  | <a href="#">#18a</a> | The data is analyzed by specialized PhD students                                                                                                                                                                                                                                                                                                                                                                                                                                                                               |
| 39 | Data collection plan:<br>retention                                    | <a href="#">#18b</a> |                                                                                                                                                                                                                                                                                                                                                                                                                                                                                                                                |
| 43 | Data management                                                       | <a href="#">#19</a>  | The data is analyzed by specialized PhD students                                                                                                                                                                                                                                                                                                                                                                                                                                                                               |
| 48 | Statistics: outcomes                                                  | <a href="#">#20a</a> | The statistical analysis will be performed by designated members of the research group who will be blinded to participants' group allocations. All statistical analyses will be conducted using IBM SPSS 24.0. All quantitative data will be summarized and presented using appropriate descriptive statistics, and baseline data from the WBVG , RRTG and CG will be analyzed using the independent-samples <i>t</i> test. To explore the effects of the training interventions on stroke patients' motor function and neural |

14

plasticity, repeated-measures analysis of variance will be used to examine differences in outcomes between and within groups at all assessment timepoints

Statistics: additional analyses [#20b](#)

Statistics: analysis population and missing data [#20c](#)

## Methods: Monitoring

Data monitoring: formal committee [#21a](#) The data is analyzed by specialized PhD students, they analyse the data be blind to group allocation.

Data monitoring: interim analysis [#21b](#)

Harms [#22](#) In the Participants gave an informed consent form

Auditing [#23](#) In the Participants gave an informed consent form

## Ethics and dissemination

Research ethics approval [#24](#) This study has been approved by the Shanghai University of Sport Research Ethics Committee (102772021RT067) 3

Protocol amendments [#25](#) Upload as attachment

Consent or assent [#26a](#) PhD students in charge of data collection will collect data within the TMS and lower limbs function will be conducted before the intervention as well as at 6 weeks, 12 weeks, and 4 weeks and 8weeks after the intervention

Consent or assent: [#26b](#)

1 ancillary studies

2 Confidentiality [#27](#) Professor Wu, who is in charge of recruitment, completes the  
3  
4 participant information management.  
5  
6

7  
8  
9 Declaration of [#28](#) The authors have no conflicts of interest to declare  
10 interests  
11  
12

13  
14 Data access [#29](#) The result will be made public by the person in charge of the Research  
15 supported by The Program for Overseas High-level talents at  
16 Shanghai Institutions of Higher Learning (TP2020063)  
17  
18  
19  
20  
21  
22

23  
24 Ancillary and post [#30](#) In the Participants gave an informed consent form.  
25 trial care  
26  
27

28 Dissemination policy: [#31a](#) This study has been registered prospectively in the Chinese  
29 trial results Clinical Trial Registry(ChiCTR2200055143,1 January 2022).It  
30 will be published in accordance with the standards of the Chinese  
31 Clinical Trial Registry  
32  
33  
34  
35  
36

37 Dissemination policy: [#31b](#) It will be written in accordance with the standards of the Chinese  
38 authorship Clinical Trial Registry.  
39  
40  
41  
42  
43

44 Dissemination policy: [#31c](#) It can be viewed in the Chinese Clinical Trial Registry.  
45 reproducible  
46 research  
47  
48

## 49 Appendices

50  
51 Informed consent [#32](#) Upload as attachment.  
52 materials  
53  
54  
55

56 Biological specimens [#33](#) None  
57  
58  
59  
60

1 None The SPIRIT Explanation and Elaboration paper is distributed under the terms of the Creative  
2 Commons Attribution License CC-BY-NC. This checklist can be completed online using  
3 <https://www.goodreports.org/>, a tool made by the [EQUATOR Network](#) in collaboration with  
4 [Penelope.ai](#)  
5  
6  
7  
8  
9  
10  
11  
12  
13  
14  
15  
16  
17  
18  
19  
20  
21  
22  
23  
24  
25  
26  
27  
28  
29  
30  
31  
32  
33  
34  
35  
36  
37  
38  
39  
40  
41  
42  
43  
44  
45  
46  
47  
48  
49  
50  
51  
52  
53  
54  
55  
56  
57  
58  
59  
60

For peer review only



# BMJ Open

## Effects of whole-body vibration training on lower-limb motor function and neural plasticity in stroke patients: protocol for a randomized controlled clinical trial

|                                 |                                                                                                                                                               |
|---------------------------------|---------------------------------------------------------------------------------------------------------------------------------------------------------------|
| Journal:                        | <i>BMJ Open</i>                                                                                                                                               |
| Manuscript ID                   | bmjopen-2022-060796.R1                                                                                                                                        |
| Article Type:                   | Protocol                                                                                                                                                      |
| Date Submitted by the Author:   | 31-May-2022                                                                                                                                                   |
| Complete List of Authors:       | Zhang, Mingkai; Shanghai University of Sport<br>jianing, wei; Shanghai University of Sport, School of Psychology<br>Wu, Xueping; Shanghai University of Sport |
| <b>Primary Subject Heading</b>: | Sports and exercise medicine                                                                                                                                  |
| Secondary Subject Heading:      | Sports and exercise medicine                                                                                                                                  |
| Keywords:                       | Stroke < NEUROLOGY, SPORTS MEDICINE, REHABILITATION MEDICINE                                                                                                  |
|                                 |                                                                                                                                                               |

SCHOLARONE™  
Manuscripts

**Title:** Effects of whole-body vibration training on lower-limb motor function and neural plasticity in stroke patients: protocol for a randomized controlled clinical trial

**Article Type:** Clinical Study Protocol

**Keywords:** Stroke; Whole-body vibration training; Lower-limbs; Neural plasticity;

Study protocol

**Author:**

1, Zhang, Mingkai

2, Jianing, Wei

3, Wu, xueping (Corresponding Author)

**Corresponding Author's Institution:** Shanghai University of Sport

## ABSTRACT

**Introduction** Lower-limb motor dysfunction is very common in stroke patients, and usually caused by brain neural connectivity disorder. Studies have shown that whole-body vibration training (WBVT) significantly improves lower-limb motor function in stroke patients, and may promote nerve remodeling. The prior purpose of this study is to explore the effects of WBVT on lower-limb motor function and neuroplasticity in stroke patients. Therefore exploring the feasibility of formal experiments.

**Methods** A single-blind randomized controlled trial will be conducted. Sixty stroke patients will be recruited and allocated randomly to WBVT, routine rehabilitation training (RRT), and control group (CG). The WBVT and RRT interventions will be implemented as five 25-min sessions weekly for continuous 12 weeks; the CG will remain daily habitual living styles and routine treatments, in community or hospital, and will also receive telephone follow-up and health-related lectures. Transcranial magnetic stimulation will be used to assess neural plasticity while lower-limb motor function is assessed using indicators of strength, walking ability, and joint activity. The assessments will be conducted at the period of baseline, Week 6, Week 12, as well as upon 4 and 8 weeks respectively after intervention completion.

**Ethics and dissemination** This study has been approved by the Shanghai University of Sport Research Ethics Committee (102772021RT067) and will provide data on the effects of WBVT relative to RRT in terms of the improvement of stroke patients' lower-limb motor function and neural plasticity. The results of this study can provide a theoretical basis for the application of WBVT for stroke patients. The results of this study will be disseminated via publications in peer-reviewed journals and presentations at international conference.

**Trail registration number:** This study has been registered prospectively in the Chinese Clinical Trail Registry (ChiCTR2200055143, 1 January 2022).

1  
2  
3  
4  
5  
6  
7 **Type of Manuscript:** Clinical Study Protocol  
8

9 **Figures and tables:** 2 figures and 6 tables  
10

11 **Number of Words:** Abstract: 286 words; Manuscript: 4,570 words  
12  
13

#### 14 **Abbreviations**

15

16  
17 WBVT, Whole-body vibration training  
18

19 RRT, routine rehabilitation training  
20

21  
22 MEP, Motor evoked potential  
23

24 Pre-SMA, pre-supplementary motor area  
25

26  
27 FMA, Fugl-Meyer assessment  
28

29 TUG, Time up and go  
30  
31  
32  
33  
34  
35  
36  
37  
38  
39  
40  
41  
42  
43  
44  
45  
46  
47  
48  
49  
50  
51  
52  
53  
54  
55  
56  
57  
58  
59  
60

# Effects of whole-body vibration training on lower-limb motor function and neural plasticity in stroke patients: protocol for a randomized controlled clinical trial

## ABSTRACT

**Introduction** Lower-limb motor dysfunction is common in stroke patients, and usually caused by brain neural connectivity disorder. Previous studies have shown that the whole-body vibration training (WBVT) significantly improves the lower-limb motor function in stroke patients, and may promote nerve remodeling. The prior purpose of this study is to explore the effects of WBVT on lower-limb motor function and neuroplasticity in stroke patients. Therefore exploring the feasibility of formal experiments.

**Methods** A single-blind randomized controlled trial will be conducted. Sixty stroke patients will be recruited and allocated randomly to WBVT, routine rehabilitation training (RRT), and control group (CG). The WBVT and RRT interventions will be implemented as five 25-min sessions weekly for continuous 12 weeks; the CG will remain daily habitual living styles and routine treatments, in community or hospital, and will also receive telephone follow-up and health-related lectures. Transcranial magnetic stimulation will be used to assess neural plasticity while lower-limb motor function is assessed using indicators of strength, walking ability, and joint activity. The assessments will be conducted at the period of baseline, Week 6, Week 12, as well as upon 4 and 8 weeks respectively after intervention completion.

**Ethics and dissemination** This study has been approved by the Shanghai University of Sport Research Ethics Committee (102772021RT067) and will provide data on the effects of WBVT relative to RRT in terms of the improvement of stroke patients' lower-limb motor function and neural plasticity. The results of this study will be disseminated via publications in peer-reviewed journals and presentations at international conference.

**Trial registration number:** This study has been registered prospectively in the Chinese Clinical Trial Registry (ChiCTR2200055143, 1 January 2022).

## Strengths and limitations of this study

1. This protocol present a rigorous design of a randomized controlled trial that aims to explore the effects of WBVT on lower-limb motor function and neuroplasticity in patients who had a stroke.
2. An accurate measurement tool and multiple indicators will be used to judge the effects of WBVT on neuroplasticity in patients who had a stroke.
3. If the result we will reach is positive, then that will provide a powerful evidence of WBVT on improve lower-limb motor function and neuroplasticity in stroke survivors.
4. The patients will come from one geographic area which limits the generalisability.

## INTRODUCTION

Stroke is prevalent and associated with high disability, recurrence, and mortality rates.<sup>[1]</sup> The latest global burden of disease study demonstrates that the overall lifetime risk of stroke in China is 39.9%, ranking the first in the world, stroke is also the leading cause among diseases of lost years of life in China.<sup>[2]</sup> Stroke patients often have a variety of sequelae. The most common is hemiplegia, which is characterized by numbness, weakness of one limb and spasticity. It significantly reduces patients' abilities to perform daily activities and impacts their quality of life.<sup>[3]</sup> Lower-limb motor function can be restored to a limited extent in more than 70% of hemiplegic patients, and most of such cannot obtain a good gait or walking speed.<sup>[4]</sup> Lower-limb motor dysfunction after stroke is caused by central nervous system injuries resulting in abnormal movement patterns.<sup>[5]</sup> Its main characteristics are poor muscle strength,<sup>[6]</sup> spasticity,<sup>[5]</sup> joint instability,<sup>[7]</sup> associated reactions,<sup>[8]</sup> and synergy movement.<sup>[9]</sup> Thus, the improvement of affected patients' muscle strength, balance ability, and walking ability is critical in restoring their lower-limb motor function.

Neural plasticity generally refers to the nervous system's inherent abilities to make structural and functional changes to adapt to changes in the internal and external environments.<sup>[10]</sup> Changes in neural plasticity after stroke have been shown to be the foundation of the recovery of motor function.<sup>[11]</sup> After unilateral stroke, the neural plasticity includes two aspects: a) changes in neural synaptic connections and b) changes in the excitability of various structures. Functional recovery after stroke is related to changes in the motor cortex and other regions regarding the brain's anatomical structure and function.<sup>[12]</sup> The presence of lesions on one side of the cerebral hemisphere reduces or inhibits the excitability of the motor cortex on that side, while the cortex of the contralateral hemisphere will be hyperexcitable.<sup>[13]</sup> Therefore, maladaptive neural plasticity exists, which regard to the hindered functional recovery of the development of an unwanted symptom , such as compensatory movement pattern, delayed-onset involuntary abnormal movement.<sup>[14]</sup> The primary motor cortex (M1) provides the main outputs to the descending motor system and autonomous motor commands. Such mechanism is closely linked to somatosensory and spatial processing in the parietal lobe, premotor cortex, and supplementary motor area; therefore, changes in M1's excitability will affect motor function.<sup>[15]</sup> M1 is also defined as the scalp site where the minimum stimulation intensity causes the maximum motor evoked potential (MEP) of the muscle. Thus, changes in the MEP reflect the conditions of motor function.<sup>[16]</sup> The pre-supplementary motor area (pre-SMA), located in between the prefrontal lobe and motor system, is responsible for functions such as language and idea generation, action recognition, working memory maintenance, learning, and the execution of action sequences.<sup>[17]</sup> The enhancement of pre-SMA activity has been found to alleviate M1 disorders in stroke patients, and changes in connectivity between motor areas may contribute to the improvements of the patients'

1  
2  
3 motor function.<sup>[18]</sup> Therefore, the recovery of lower-limb motor function in stroke  
4 patients correlates to the functional connectivity between cerebral hemispheres, as well  
5 as the normalization of the bilateral sensorimotor cortical network.  
6

7 Exercise intervention therapy has the advantages of compliance, minimal side  
8 effects, and strong operability. It has become an important means of rehabilitation for  
9 stroke patients<sup>[19]</sup>. Functional recovery after stroke is a complex process. The repeated  
10 sensory input is among the most effective means of improving the cortical structure and  
11 body function <sup>[20]</sup>. In addition, early intervention, task-oriented training, and repetitive  
12 intensity are also determinants of motor function recovery after stroke.<sup>[21]</sup> The repeated  
13 performance of specific actions during exercise has been found to construct motor  
14 memory, which is a form of brain plasticity improvement<sup>[22]</sup>. In addition to improving  
15 muscle strength and joint activity, exercise intervention therapy can aid the  
16 improvement of neural plasticity and brain function, thereby promoting the recovery of  
17 motor function.<sup>[23]</sup> However, patients' defected motor function and executive function  
18 will potentially make it difficult for them to effectively remember and perform complex  
19 rehabilitation. In that way, the effectiveness of rehabilitation is compromised.<sup>[24]</sup> Thus,  
20 the key to an effective rehabilitation is to enable patients to exercise as much as possible  
21 only if within their limited range of physical activity.  
22

23 Whole-body vibration training (WBVT) is an exercise or treatment method used  
24 in sport, physiotherapy and rehabilitation.<sup>[25][26]</sup> During WBVT, people sit, stand, or  
25 exercise on a vibrating platform that generate vibration.<sup>[27]</sup> WBVT was found to activate  
26 the muscle spindles, thereby inducing reflex muscle activation.<sup>[28]</sup> It has also been found  
27 to effectively improve the lower-limb muscle strength,<sup>[29]</sup> spasticity,<sup>[30]</sup> walking  
28 ability,<sup>[31]</sup> and balance<sup>[32]</sup> of many people, including stroke patients.<sup>[33]</sup> In addition, a  
29 review of the clinical application of WBVT in patients with chronic stroke showed that  
30 its main effects include promotion of muscle contraction, stimulation of the  
31 proprioceptive system, and improvement of motor control ability .<sup>[34]</sup> WBVT has also  
32 been shown to increase oxygen consumption and promote the release of vasodilators in  
33 stroke patients, without additional effects on the heart rates or blood pressure.<sup>[35]</sup> Thus,  
34 a period of WBVT can improve blood perfusion on the affected side in stroke  
35 patients.<sup>[36]</sup> In addition, a transcranial magnetic stimulation (TMS) study revealed  
36 significant changes in cortical excitability after vibration training in healthy people<sup>[37]</sup>.  
37 The convergence of evidence from several experimental studies suggests that WBVT  
38 induces the reorganization of sensory motor processes in healthy people's brain.<sup>[29]</sup> It  
39 may also promote functional recovery after stroke by enhancing the proprioceptive  
40 afferents of the central nervous system.<sup>[24]</sup> Emperical evidence suggested that after a  
41 period of WBVT, TMS study found three dominant changes on the sample stroke  
42 patients: their motor thresholds decreased; their MEP amplitudes increased; and their  
43 flexor muscle activation improved.<sup>[32]</sup> The scholars concluded that changes in cortical  
44 excitability were related to motor function, and that WBVT was a suitable non-drug  
45 treatment to promote the recovery of neural plasticity and motor function in stroke  
46 patients, even if the patients were in the chronic phase.<sup>[32]</sup> Thus, WBVT can effectively  
47 improve the motor function of stroke patients, and may also have a strong effect on  
48 brain neural plasticity. However, limited research on this topic has been conducted, and  
49  
50  
51  
52  
53  
54  
55  
56  
57  
58  
59  
60

1  
2  
3 scholars have reached different conclusions. In addition, the type and parameter of  
4 effective WBVT has not been explicitly identified; further research is needed.  
5

6 In sum, little research has examined the application of WBVT for the rehabilitation  
7 of stroke patients, and especially the positive and negative impacts of WBVT on these  
8 patients' brain function. Thus, this randomized controlled trial (RCT) was designed to  
9 examine the impacts of WBVT on stroke patients' lower-limb motor function and  
10 neural plasticity. Lower-limb motor function will be evaluated by isokinetic muscle  
11 strength and other assessment method, and TMS will be used to examine changes in  
12 neural plasticity.  
13  
14

## 15 16 **AIMS AND OBJECTIVES**

17 This study aim to determine the effect of 12 weeks of WBVT on stroke patients'  
18 lower-limb motor function and neural plasticity, and explore the difference between  
19 wbvvt and routine rehabilitation training after 6 and 12 weeks of training. In addition,  
20 this study will evaluate and compare it after 4 and 8 weeks of stopping training. The  
21 feasibility of a future full-scale RCT will be assessed.  
22

23 The study objectives are to:

- 24 a).clarify the effects of WBVT on stroke patients' lower-limb motor function and neural  
25 plasticity;  
26 b).analyze the training effects and maintenance times of the two training methods;  
27 c).explore the facilitators, barriers, and contextual factors influencing the  
28 implementation of WBVT;  
29 d).test the acceptability of the data collection procedures used.  
30  
31  
32  
33

## 34 **METHODS AND DESIGN**

### 35 **Study design**

36 This study was designed as a prospective single-blind RCT. Eligible participants  
37 with stroke will be assigned randomly to the whole-body vibration training group  
38 (WBVG), routine rehabilitation training group (RRTG), and control group (CG) at a  
39 ratio of 1:1:1. The CG will maintain daily living and routine treatment, in community  
40 or hospital, and will also receive telephone follow-up and lectures. On this basis, the  
41 WBVG and RRTG will receive exercise interventions in the Sports Laboratory of  
42 Shanghai University of Sport, Shanghai, China. The interventions will be implemented  
43 5 times a week for 12 weeks and 25min a day. The training will be arranged from  
44 Monday to Friday. Participants will be evaluated at baseline, after 6 and 12 weeks of  
45 intervention, and 4 and 8 weeks after intervention termination (Figure 1). This research  
46 protocol has been approved by the research ethics committee of Shanghai University of  
47 Sport (no. 102772021RT067).The study is scheduled to begin in September 2022 and  
48 continue until January 2023.  
49  
50  
51  
52  
53  
54

55 **Figure 1.** Diagram of study flow.  
56  
57  
58

### 59 **Participants**

60



Participants in Shanghai will be recruited through community outreach, from outpatient clinics, with media advertising, and by telephone. All participants will follow their routine medication and physical therapy/massage regimens during the study period. They will provide written informed consent before inclusion in the study. Before and after the intervention, data on participants' demographic and clinical characteristics will be collected and analyzed (Table 1).

**Table 1.** Demographic and clinical characteristics of participants

|                                     | WBVG | RRTG | CG |
|-------------------------------------|------|------|----|
| Age                                 |      |      |    |
| Gender                              |      |      |    |
| BMI                                 |      |      |    |
| Time of illness                     |      |      |    |
| Stroke type                         |      |      |    |
| Affected side                       |      |      |    |
| Whether auxiliary equipment is used |      |      |    |
| FMA score                           |      |      |    |
| Berg score                          |      |      |    |
| TUG                                 |      |      |    |
| MoCA score                          |      |      |    |
| SF-36                               |      |      |    |

Note: WBVG, Whole-body vibration training group; RRTG, routine rehabilitation training group; CG, control group; BMI, body mass index; FMA, Fugl-Meyer assessment; TUG, Time up and go; MoCA, Montreal Cognitive Assessment; SF-36, the MOS item short form health survey

### **Inclusion and exclusion criteria**

The inclusion criteria will be: a) The included cases met the inclusion criteria of stroke in the classification scheme of various cerebrovascular diseases formulated by the Fourth National Academic Conference on cerebrovascular diseases in 1995, and were confirmed by cranial CT or MRI, b) Brunnstrom stage IV, c) ability to stand and walk without the help of another person, d) stable medical condition, e) aged 50-75 years, f) duration of illness  $\geq 3$  months, g) no serious organ disease, h) no vibration training experience. The exclusion criteria will be: a) It does not meet the diagnostic criteria of stroke in the classification scheme of various cerebrovascular diseases formulated by the fourth national cerebrovascular disease academic conference in 1995, and there is no head CT or MRI confirmation; b) other nervous system disease, c) severe skeletal muscle or cardiovascular disease, d) severe lumbar disc herniation, e) dysfunction or failure of the heart, lung, liver, kidney, or other major organ, f) other serious disease or exercise contraindication, and g) vibration training experience.

### **Sample size**

The sample size has been estimated using the G\*power statistical software (version 3.1.9.2 for Windows 7 X64; Franz Faul, Kiel University, Germany), used



1  
2  
3 widely for this purpose. In this part of the study, the sample size was estimated by F  
4 tests: analysis of variance (ANOVA): related measures, between factors: computer  
5 required sample size. Under the significance level of 0.05 and repeated-measures  
6 ANOVA setting of 80% efficacy, the total number of subjects needed was determined  
7 to be 42 (14 per group). Considering a 20% loss rate, we plan to recruit 60 subjects (20  
8 per group).  
9  
10

## 11 12 **Randomization**

13 Eligible participants will be randomised into Whole-body vibration training group,  
14 routine rehabilitation training group and control group at 1:1:1 ratio after consenting  
15 and baseline assessment. Excel software will be used to code the subjects in 1-60  
16 according to the recruitment time, and then use the formula "= RAND ()" to generate  
17 the corresponding random sequence. By sorting the random sequence and then  
18 grouping it, 60 subjects will be randomly grouped. These tasks will be completed by  
19 professional computer workers blinded to recruitment and allocation after the  
20 completion of recruitment.  
21  
22  
23  
24

## 25 **Interventions**

### 26 ***WBVT intervention***

27 Because of the stroke characteristics, patients usually have weak muscle strength  
28 in the lower limbs and poor balance, they will better accept low-frequency vibration  
29 training<sup>[38]</sup>, which has been shown to be more likely to induce changes in brain nerve  
30 excitation<sup>[Error! Bookmark not defined.]</sup>. The WBVT intervention will be implemented using  
31 a vibrating platform (I-vib5050A; Bodygreen, Taiwan) that generates vertical  
32 vibrations and has an adjustable frequency range (6–12 Hz). During WBVT sessions,  
33 the subjects will wear shoes to stand on a vibrating platform. The vibration frequency  
34 will be increased in a stepwise manner in three phases (weeks 1–4, 5–8, and 9–12)  
35 over the 12-week intervention period. The training will consist of adaptation to  
36 the vibration (6, 7, and 7 Hz, respectively, in phases 1–3) with 5 minutes of  
37 static standing, 1 minute of rest, two rounds of 5 minutes of rhythmic half-  
38 squat to standing practice (alternation of 60° knee flexion and standing for 5  
39 seconds each) with vertical vibration (8, 10, and 12 Hz, respectively, in  
40 phases 1–3) and 1 minute rest between rounds, 5 minutes of vertical vibration  
41 (8, 10, and 12 Hz, respectively, in phases 1–3) under traction created by the  
42 placement of a ~4-cm-thick towel under the front sole of the foot to bend the  
43 patient's ankle back and pull the calf muscles with 1 minute rest between  
44 rounds, and a final 5 minutes of standing with vibration (6, 7, and 7 Hz,  
45 respectively, in phases 1–3). The peak-to-peak displacement will be  
46 maintained at 4 mm in all phases. The participants will be monitored  
47 continuously during training, and training will be terminated immediately  
48 upon complaint of any abnormal condition, such as panic, chest tightness,  
49 dizziness, or pain (Table 2).  
50  
51  
52  
53  
54  
55  
56  
57  
58  
59  
60

**Table 2.** Whole-body vibration training schedule

| Time           | Vibration time<br>(min) | Schedule (min) | Vibration frequency<br>(Hz) |
|----------------|-------------------------|----------------|-----------------------------|
| Phase I        |                         |                |                             |
| Week 1 and 2   | 25                      | 5-5-5-5-5      | 6-8                         |
| Week 3 and 4   | 25                      | 5-5-5-5-5      | 6-8                         |
| Phase II       |                         |                |                             |
| Week 5 and 6   | 25                      | 5-5-5-5-5      | 7-10                        |
| Week 7 and 8   | 25                      | 5-5-5-5-5      | 7-10                        |
| Phase III      |                         |                |                             |
| Week 9 and 10  | 25                      | 5-5-5-5-5      | 7-12                        |
| Week 11 and 12 | 25                      | 5-5-5-5-5      | 7-12                        |

### ***Routine rehabilitation exercise intervention***

The routine rehabilitation exercise intervention will consist of in-situ alternate leg lifting with the feet at shoulder width (while in a safe, stable position and with the help of both hands/arms), in-situ squatting (to 60–90°, increasingly gradually according to the patient's condition) with the feet at shoulder width (while holding a protective rod), in-situ heel lifting while on a step with the feet at shoulder width (while holding a protective rod), and walking on a treadmill equipped with safety handrails (Table 3). Their exercise intensity will be monitored using the Borg scale (Table 4)<sup>[39]</sup>.

### ***Control group***

These participants will be requested to maintain their original habits of lifestyle. They will receive usual care including usual stroke services available to the participants, including but not limited to, medical consultations offered by hospital, rehabilitation services by community-based organisations.

Participants in the control group will receive telephone follow-up and health lectures but will not receive any specific exercise training from the study scheme.

The specific intervention details of the three groups are shown in Table 5.<sup>[40]</sup>

**Table 3.** Routine rehabilitation training

| Phase        | Exercise                      | Repetitions/duration                                                    |
|--------------|-------------------------------|-------------------------------------------------------------------------|
| I: weeks 1–4 | Alternating in-situ leg lifts | 2 rounds of 30 s, inter-round interval to complete recovery             |
|              | In-situ squats                | 2 rounds of 8–10 repetitions, inter-round interval to complete recovery |
|              | Step heel lifts               | 2 rounds of 15 repetitions, inter-round interval to complete recovery   |

|    |                 |                                |
|----|-----------------|--------------------------------|
| 1  |                 |                                |
| 2  |                 |                                |
| 3  |                 |                                |
| 4  |                 | Walking                        |
| 5  | II: weeks 5–8   | 5 min                          |
| 6  |                 | Alternating in-situ leg lifts  |
| 7  |                 | 3 rounds of 30 s, inter-round  |
| 8  |                 | intervals to complete recovery |
| 9  |                 | In-situ squats                 |
| 10 |                 | 3 rounds of 8–10 repetitions,  |
| 11 |                 | inter-round intervals to       |
| 12 |                 | complete recovery              |
| 13 |                 | Step heel lifts                |
| 14 |                 | 3 rounds of 15 repetitions,    |
| 15 |                 | inter-round intervals to       |
| 16 |                 | complete recovery              |
| 17 |                 | Walking                        |
| 18 | III: weeks 9–12 | 10 min                         |
| 19 |                 | Alternating in-situ leg lifts  |
| 20 |                 | 3 rounds of 30 s, inter-round  |
| 21 |                 | intervals to complete recovery |
| 22 |                 | In-situ squats                 |
| 23 |                 | 4 rounds of 8–10 repetitions,  |
| 24 |                 | inter-round intervals to       |
| 25 |                 | complete recovery              |
| 26 |                 | Step heel lifts                |
| 27 |                 | 4 rounds of 15 repetitions,    |
| 28 |                 | inter-round intervals to       |
| 29 |                 | complete recovery              |
| 30 |                 | Walking                        |
| 31 |                 | 10 minutes                     |

**Table 4. Borg scale**

| Level | Description                                                                     |
|-------|---------------------------------------------------------------------------------|
| 6     | No exertion at all                                                              |
| 7     | Extremely light                                                                 |
| 8     | Light                                                                           |
| 9     | Very light (easy, slow walking at a comfortable pace)                           |
| 10    | This is the effort level where you can't hear your breath                       |
| 11    | You are able to easily talk and you can run at this level for a long time       |
| 12    | Light (you are building aerobic endurance)                                      |
| 13    | Somewhat hard (you are making quite an effort; you feel tired but can continue) |
| 14    | You start to hear your breath, but are not gasping for air                      |
| 15    | You can talk, but it is more challenging, you use one- or two-word answers      |
| 16    | Hard (this is considered to be your steady state)                               |
| 17    | Very hard (very strenuous and you are very fatigued)                            |
| 18    | Your breathing is vigorous, you can't talk, you are gasping for air             |
| 19    | Extremely hard (you are counting the minutes until it ends)                     |
| 20    | Maximal exertion                                                                |

**Table 5.** <sup>[40]</sup> Exercise intervention TIDieR

| Item no. | Brief name           | Group                                                                                                                                                                                                                        |                                                                                                                                                      |                                                                                                                                              |
|----------|----------------------|------------------------------------------------------------------------------------------------------------------------------------------------------------------------------------------------------------------------------|------------------------------------------------------------------------------------------------------------------------------------------------------|----------------------------------------------------------------------------------------------------------------------------------------------|
|          |                      | WBVG                                                                                                                                                                                                                         | RRTG                                                                                                                                                 | CG                                                                                                                                           |
| 1        | Why                  | WBVT                                                                                                                                                                                                                         | Routine rehabilitation training                                                                                                                      | Control                                                                                                                                      |
| 2        | What                 | 12 weeks training under the guidance of professionals                                                                                                                                                                        |                                                                                                                                                      | Maintenance of usual living habits, no exercise advice, regular attendance of health lectures, telephone follow-up                           |
| 3        | What (content)       | 25 min exercise, five times/week                                                                                                                                                                                             |                                                                                                                                                      | Attendance of fortnightly health lectures, monthly telephone interviews                                                                      |
| 4        | What (procedure)     | Evaluation at baseline ,6 weeks and 12 weeks, and 4 and 8 weeks after intervention termination,reporting of results to participants so that they can understand the physical changes occurring                               |                                                                                                                                                      |                                                                                                                                              |
| 5        | Who (administrators) | WBVT coach is a professional rehabilitation physician, assessments performed by Shanghai University of Sport PhD students                                                                                                    | Routine rehabilitation training coach is a professional rehabilitation physician, assessments performed by Shanghai University of Sport PhD students | Health lectures and telephone interviews performed by Shanghai University of Sport PhD students (College of Physical Education and Training) |
| 6        | How                  | The exercise interventions will take place in a stationary gymnasium, the instructors will direct the whole group face to face                                                                                               |                                                                                                                                                      | The health lectures will be held in the conference room of the College of Physical Education and Training, Shanghai University of Sport      |
| 7        | When and how much    | See Table 2                                                                                                                                                                                                                  | See Table 3                                                                                                                                          | Health lectures, 30–50 min; interviews, 10 min                                                                                               |
| 8        | How well             | Participants will receive regular feedback, including physical and psychological data and reports on their motor skills learning performance; they will be kept up to date on their progress and status to keep them engaged |                                                                                                                                                      |                                                                                                                                              |

Note:TIDieR, Template for intervention Description and Replication;<sup>[40]</sup> WBVG, whole-body vibration training group; RRTG, routine rehabilitation training group; CG,control group;WBVT, whole-body vibration training.

### Transcranial magnetic stimulation (TMS) protocol

#### Electromyographic recording

Surface electromyograms will be recorded from the rectus femoris (RF) muscle with 9-mm-diameter Ag-AgCl surface electrodes. The electrode will be placed on the

1  
2  
3 muscle belly of the RF, and the reference electrode will be located above the patella.  
4 (Figure 2). The signal will be amplified (1000×), bandpass filtered (2–2.5 kHz; Intronix  
5 Technologies Model), digitized at 5 kHz by an analog–digital interface (Micro1401;  
6 Cambridge Electronics Design, Cambridge, UK), and saved for offline analysis.  
7  
8  
9

## 10 TMS

11 TMS will be applied to the bilateral M1 with a figure-of-eight–shaped coil (7-cm  
12 external loop diameter) connected to two single-pulse monophasic stimulators  
13 (Magstim Co., Whitland, Dyfed, UK). The M1 hotspot will be defined as the scalp  
14 location inducing the largest peak–peak MEP amplitude in the contralateral RF muscle.  
15 The handle of the test stimulus (TS) coil will be angled posteriorly 30–45° from the  
16 midsagittal line. TS1mV will be defined as the lowest TMS intensity required to  
17 generate MEPs of 1 mV in the relaxed RF muscle in at least 5 of 10 trials. The resting  
18 motor threshold (RMT) will be defined as the lowest TMS intensity required to generate  
19 MEPs > 50 V in at least 5 of 10 trials with the target muscle completely relaxed<sup>[41]</sup>.  
20  
21  
22  
23  
24

25 **Figure 2.** EMG acquisition site.  
26  
27

## 28 **Isokinetic strength assessment protocol**

29 Due to the particularities of the participants' conditions, for safety reasons and  
30 based on previous isokinetic muscle strength research, the angular velocity for  
31 isokinetic strength testing in both lower limbs will 60°/s. The testing instrument will be  
32 warmed up and debugged before assessment. The assessment will be performed after  
33 an adaptability exercise with the participant's body fixed and his or her hands placed in  
34 front of the chest. The test action will be repeated five times with intervening 90-s rest  
35 intervals. The average peak torque of the flexor and extensor muscles of the knee joint  
36 will be taken as the measure of strength. The peak torque is the gold-standard measure  
37 for isokinetic assessment, and has shown high degrees of accuracy and repeatability<sup>[42]</sup>.  
38  
39  
40  
41  
42

## 43 **Outcomes**

### 44 **Primary outcome**

#### 45 *Neural plasticity*

##### 46 *MEP amplitude*

47 MEPs will be recorded during TMS. MEP amplitudes will be measured as peak-  
48 to-peak values.  
49

##### 51 *Short-interval intracortical inhibition (SICI)*

52 The intensity of the conditioning stimulus(CS) is 80%RMT or 90%RMT ,the  
53 intensity of test stimulus (TS) is 1MV. The interstimulus intervals (ISIs) will be 2,  
54 3, and 4 ms. Each block will contain 40 trials in random order<sup>[43][44]</sup>.  
55  
56  
57

##### 58 *M1–pre-SMA connectivity*

59  
60

To investigate changes in connectivity between the left M1 and pre-SMA after long-term exercise training, the two high-power Magstim 200 devices and two figure-of-eight coil sites will be performed with TMS. Coil placement will be performed as in a similar hemispheric study to avoid overlap<sup>[45]</sup>. The smaller CS coil will be placed over the right hemisphere to induce a medially directed current in the brain, and will be used to stimulate the pre-SMA. The TS coil will be placed over the leg representation of the left hemisphere for the induction of a posterior–anterior current in the brain. The CS will be delivered by an octagonal coil (50-mm diameter) to stimulate the pre-SMA. Its intensity will be 110% or 90% of the RMT. The angle between the placement direction and the scalp midline will be 45° to induce a front-to-back current<sup>[46]</sup>. The TS (M1) intensity will be set to evoke a resting MEP with the same TMS coil. The ISIs will be 6, 8, 10, 30, 40, and 50 ms. The strength of the CS will be changed for each block, and complete the order pseudo-random for each subject block. Each block will contain 60 trials. Separate TS will be collected 10 times. The MEP of each ISI will be collected 10 times, for a total of 70 measurements. Each block will contain 70 trials in random order.

### ***Lower-limb motor function***

#### *Peak torque*

Participants' lower-limb flexion and extension muscle strength will be measured by using the Biodex isokinetic testing system (Biodex Medical System 4, NY, USA)<sup>[47]</sup> at all assessment timepoints.

#### *Brunnstrom stage*

The Brunnstrom approach is a set of treatment methods for dyskinesia after central nervous system injury developed by Swedish physiotherapist Signe Brunnstrom. Motor function recovery is divided into six stages, with muscle tension increasing gradually from low to high and joint reaction, joint movement, and spasm gradually becoming significant. With the completion of common motion, separation motion, and fine motion appear until they completely return to normal<sup>[48]</sup>.

#### *Fugl-Meyer assessment*

Fugl-Meyer assessment (FMA) is a simplified, time-saving means of evaluating upper- and lower-limb motor function. The index comprises upper-limb (66 points) and lower-limb (34 points) items (total, 100 points). Higher scores reflect better functional recovery. FMA scores can be used to characterize the severity of dyskinesia in stroke patients. Only the lower-limb FMA items will be applied in this study. The passive range of motion of each joint of each participant will be determined before FMA. During the assessment, the non-hemiplegic side will be evaluated first, followed by the hemiplegic side<sup>[49]</sup>.

#### *Timed up-and-go test*

The timed up-and-go test is used to assess patients' mobility, balance, walking ability, and fall risk. The participant will sit in a standard armchair

1  
2  
3 with his or her back touching the chair and arms on the armrests. Assistive  
4 devices for walking will be placed near the chair. He or she will then be asked  
5 to walk to a sign placed at a distance of 3 m at a safe and normal speed, turn  
6 around, walk back to the chair, and sit down. The test is complete when the  
7 participant's hip touches the seat, and the time taken to complete it (in seconds)  
8 will be recorded<sup>[50]</sup>.  
9  
10

### 11 *Berg balance test*

12 The Berg balance test includes 14 actions, with performance scored on a  
13 0–4 scale (total possible score, 56). Higher scores reflect better balance  
14 function. Scores of 0–20 indicate that a patient is safe with wheelchair use,  
15 scores of 21–40 indicate that the patient should use an assistive device to walk,  
16 and scores of 41–56 indicate that the patient can walk independently; thus,  
17 scores < 40 indicate a fall risk<sup>[51]</sup>.  
18  
19  
20  
21  
22

### 23 **Secondary outcomes**

24 the MOS item short form health survey(SF-36)

25 It is also called health survey brief table. It comprehensively summarizes the  
26 quality of life of the respondents from eight aspects: physiological function,  
27 physiological function and mental health. In addition to the above eight aspects,  
28 SF-36 also includes another health indicator: HT: reported health transition,  
29 which is used to evaluate the overall change of health status in the past year.  
30 Evaluation method: the higher the score of each item, the better the health  
31 status<sup>[48]</sup>.  
32  
33  
34  
35

### 36 Montreal Cognitive Assessment(MOCA)

37 The scale will comprehensively evaluate the cognitive function of patients from the  
38 aspects of visual space and executive function, naming, memory, attention and  
39 language fluency. The full score of the scale is 30 points,  $\geq 26$  points are normal, 18-  
40 26 points are mild cognitive impairment, 10-17 points are moderate cognitive  
41 impairment, and less than 10 points are moderate cognitive impairment. If the subject's  
42 years of education  $\leq 12$  years (high school level), the result can be added by 1 point,  
43 but the total score cannot exceed 30 points<sup>[52]</sup>.  
44  
45  
46  
47  
48

### 49 **Patients and public involvement**

50 Participants have not been involved in the study recruitment. The author conceived the  
51 initial research questions and outcome measures, and modified according to the  
52 telephone interviews with patients and their guardians by a research assistant. In order  
53 to assure the safety and feasibility of the intervention, ten stroke patients will be invited  
54 to learn and practise the whole-body vibration training and routine rehabilitation  
55 training before designing the RCT. Whole-body vibration training and routine  
56 rehabilitation training were revised based on the exercise performance and feedback  
57 provided by the participants. The burden of the intervention will be assessed by patients  
58  
59  
60



and their advisors through face-to-face interviews before signing informed consent. The findings of the study will be disseminated to the participants and their guardians.

### Statistical analysis

The statistical analysis will be performed by designated members of the research group who will be blinded to participants' group allocations. All statistical analyses will be conducted using IBM SPSS 24.0. All quantitative data will be summarized and presented using appropriate descriptive statistics, and baseline data from the WBVG, RRTG and CG will be analyzed using the independent-samples *t* test. To explore the effects of the training interventions on stroke patients' motor function and neural plasticity, repeated-measures analysis of variance will be used to examine differences in outcomes between and within groups at all assessment timepoints (Table 6).

**Table 6.** Overview of the analysis of differences among study groups

|               | Group                  | Baseline | 12 weeks | 4 weeks after intervention | F (P value) Group effect | F (P value) Interaction effect |
|---------------|------------------------|----------|----------|----------------------------|--------------------------|--------------------------------|
| FMA           | WBVT<br>RRT<br>Control |          |          |                            |                          |                                |
| TUG           | WBVT<br>RRT<br>Control |          |          |                            |                          |                                |
| Berg          | WBVT<br>RRT<br>Control |          |          |                            |                          |                                |
| Brunnstrom    | WBVT<br>RRT<br>Control |          |          |                            |                          |                                |
| Peak torque   | WBVT<br>RRT<br>Control |          |          |                            |                          |                                |
| Mep amplitude | WBVT<br>RRT<br>Control |          |          |                            |                          |                                |
| SICI          | WBVT<br>RRT<br>Control |          |          |                            |                          |                                |
| M1-pre- SMA   | WBVT<br>RRT<br>Control |          |          |                            |                          |                                |



|       |                        |  |  |  |  |  |
|-------|------------------------|--|--|--|--|--|
| MoCA  | WBVT<br>RRT<br>Control |  |  |  |  |  |
| SF-36 | WBVT<br>RRT<br>Control |  |  |  |  |  |

Note: WBVT,whole-body vibration training; RRT,routine rehabilitation training; FMA,Fugl-Meyer assessment;TUG,Time up and go;MoCA,Montreal Cognitive Assessment;SF-36,the MOS item short form health survey;SICI,Short-interval intracortical inhibition;M1, primary motor cortex;pre-SMA,pre-supplementary motor area

## ETHICS AND DISSEMINATION

All individuals who meet the study criteria will be required to sign an informed consent from prior to enrollment in the study. This study protocol has been approved by the Shanghai University of Sport Research Ethics Committee (102772021RT067). Study findings will be disseminated via publication in peer-reviewed journals and presentations at international conferences.

Funding:This study was supported by grants from the Research supported by The Program for Overseas High-level talents at Shanghai Institutions of Higher Learning (TP2020063)

## Contributorship statement

Mingkai Zhang: Data curation, Writing- Original draft preparation,Writing- Reviewing and Editing. Jianing Wei: Visualization, Investigation. Xueping Wu: Conceptualization, Methodology, SoftwarePriya.

## Competing interests

There are no competing interests for any authors.

## Figure legends

**Figure 1.** Diagram of study flow.

Note:WBVT,Whole-body vibration training

## REFERENCES

- [1] Benjamin EJ, Virani SS, Callaway CW, *et al.* Heart disease and stroke statistics-2018 update: a report from the American heart association. *Circulation* ,2018;137:e67–492.doi:10.1161/CIR.0000000000000558
- [2]"Brief report on stroke prevention and treatment in China,2019." *Chinese Journal of Cerebrovascular Disease* ,17.05(2020):272-281. doi:CNKI:SUN:NXGB.0.2020-05-009.
- [3] Wist, S. , J. Clivaz , and M. Sattelmayer . "Muscle strengthening for hemiparesis after stroke: A meta-analysis." *Annals of Physical & Rehabilitation Medicine* (2016):114-124.doi:10.1016/j.rehab.2016.02.001.
- [4]Yulian Zhu.*Effects of Modified Constraint-induced Movement Therapyon Walking Ability and*

- 1  
2  
3  
4  
5  
6  
7  
8  
9  
10  
11  
12  
13  
14  
15  
16  
17  
18  
19  
20  
21  
22  
23  
24  
25  
26  
27  
28  
29  
30  
31  
32  
33  
34  
35  
36  
37  
38  
39  
40  
41  
42  
43  
44  
45  
46  
47  
48  
49  
50  
51  
52  
53  
54  
55  
56  
57  
58  
59  
60
- 
- Gait in Stroke Patients with Hemiplegic*. 2016. Shanghai University of Sport, PhD dissertation.
- [5] Broderick, P. , et al. "Mirror therapy for improving lower limb motor function and mobility after stroke: A systematic review and meta-analysis." *Gait & Posture* (2018): 63: 208-220. doi: 10.1016/j.gaitpost.2018.05.017.
- [6] Ramsay, J. W. , et al. "Paretic muscle atrophy and non-contractile tissue content in individual muscles of the post-stroke lower extremity." *Journal of Biomechanics* 44.16(2011):2741-2746. doi:10.1016/j.jbiomech.2011.09.001.
- [7] Oh, D. S. , and J. D. Choi . "The effect of motor imagery training for trunk movements on trunk muscle control and proprioception in stroke patients." *Journal of Physical Therapy Science* 29.7(2017):1224-1228. doi:10.1598/jpts.29.1224.
- [8] Kline, T. L. , B. D. Schmit , and D. G. Kamper . "Exaggerated interlimb neural coupling following stroke." *Brain A Journal of Neurology* 1:159-169. doi:10.1093/brain/awl278.
- [9] Fulk, G. D. , et al. "Estimating Clinically Important Change in Gait Speed in People With Stroke Undergoing Outpatient Rehabilitation." *Journal of Neurologic Physical Therapy* 35.2(2011):82-89. doi:10.1097/NPT.0b013e318218e2f2.
- [10] Yali Liang. *Effect of Pro Kin balance training combined with suspension training on lower limb motor function of stroke patients*. 2021. Shengyang Sports University, MA thesis.
- [11] Longfeng Qi. *Effects of repetitive transcranial magnetic stimulation on lower extremity motor function in patients after stroke*. 2019. Qingdao University, MA thesis.
- [12] Liang, et al. "Dynamic functional reorganization of the motor execution network after stroke." *Brain: A Journal of Neurology* 133.4(2010):1224-1238. doi:10.1093/brain/awq043.
- [13] Corti, M. . "Repetitive transcranial magnetic stimulation of motor cortex after stroke: a focused review." *American Journal of Physical Medicine & Rehabilitation* 91.3(2012):254-270. doi:10.1097/PHM.0b013e318228bf0c
- [14] Dimyan, M. A. , and L. G. Cohen . "Neuroplasticity in the context of motor rehabilitation after stroke." *Nature Reviews Neurology* 7.2(2011):76-85. doi:10.1038/nrneurol.2010.200
- [15] Graziano, Msa , and T. N. Aflalo . "Mapping Behavioral Repertoire onto the Cortex." *Neuron* 56.2(2007):239-251. doi:10.1016/j.neuron.2007.09.013
- [16] Jue Wang. *TMS modulation effect : Individualized precise- localization of hand motor area and evaluation of its aftereffect*. 2020. Shanghai University of Sport, PhD dissertation.
- [17] Nachev, P. , et al. "The role of the pre-supplementary motor area in the control of action." *NeuroImage* 36(2007):T155-T163. doi: 10.1016/j.neuroimage.2007.03.034
- [18] Tzika, and Aria. "fMRI as a molecular imaging procedure for the functional reorganization of motor systems in chronic stroke." *Molecular Medicine Reports* 8.3(2013):775-779. doi: 10.3892/mmr.2013.1603.
- [19] Yongjun Wang, et al. "China stroke report 2019 (Chinese version) ( 1 ) ." *Chinese Journal of Stroke* 15.10(2020):1037-1043. doi:CNKI:SUN:ZUZH.0.2020-10-001.
- [20] Ward NS, Cohen LG. Mechanisms underlying recovery of motor function after stroke. *Arch Neurol*. 2004;61:1844-1848. doi: 10.1111/j.1398-9995.2007.01342.x.
- [21] Rensink, M. , et al. "Task-oriented training in rehabilitation after stroke: systematic review." *Journal of Advanced Nursing* 65.4(2010):737-754. doi: 10.1111/j.1365-2648.2008.04925.x
- [22] Classen, J. , et al. "Rapid plasticity of human cortical movement representation induced by practice." *Journal of Neurophysiology* 79.2(1998):1117-23. doi:10.1007/s002329900335
- [23] Zheng, G. Z. , and M. Chopp . "Neurorestorative therapies for stroke: underlying mechanisms and translation to the clinic." *Lancet Neurology* 8.5(2009):491-500. doi:10.1016/S1474-4422(09)70061-4
- [24] Lo, Suzanne Hoi Shan, et al. "Feasibility of a ballet-inspired low-impact at-home workout programme for adults with stroke: a mixed-methods exploratory study protocol." *BMJ open* 11.4 (2021): e045064. doi:10.1136/bmjopen-2020-045064
- [25] Rauch, F. , et al. "Reporting whole-body vibration intervention studies: Recommendations of the International Society of Musculoskeletal and Neuronal Interactions." *J Musculoskeletal Neuronal Interact* 10.3(2010):193-198. doi:10.1080/0305006910270105
- [26] Zee, Eavd . "Reporting Guidelines for Whole-Body Vibration Studies in Humans, Animals and Cell Cultures: A Consensus Statement from an International Group of

- Experts." *Biology* 10.10:965.doi:10.3390/biology10100965
- [27] Wuestefeld, A. , et al. "Towards reporting guidelines of research using whole-body vibration as training or treatment regimen in human subjects—A Delphi consensus study." *PLOS ONE* 15(2020).doi:10.1371/journal.pone.0235905
- [28] Huang, Meizhen, et al. "Whole-body vibration modulates leg muscle reflex and blood perfusion among people with chronic stroke: a randomized controlled crossover trial." *Scientific reports* 10.1 (2020): 1-11.doi:10.1038/s41598-020-58479-5
- [29] Celletti, Claudia, et al. "Promoting post-stroke recovery through focal or whole body vibration: criticisms and prospects from a narrative review." *Neurological Sciences* 41.1 (2020): 11-24.doi:10.1007/s10072-019-04047-3
- [30] Chan, K. S. , et al. "Effects of a single session of whole body vibration on ankle plantarflexion spasticity and gait performance in patients with chronic stroke: a randomized controlled trial." *Clinical Rehabilitation* 26.12(2012):1087.doi:10.1177/0269215512446314
- [31] Hilgers, C. , et al. "Effects of whole-body vibration training on physical function in patients with Multiple Sclerosis." *Neurorehabilitation* 32.3(2013):655-663.doi:10.3233/NRE-130888
- [32] El-Shamy, S. M. . "Effect of whole-body vibration on muscle strength and balance in diplegic cerebral palsy: a randomized controlled trial." *Am J Phys Med Rehabil* 93.2(2014):114-121.doi:10.1097/PHM.0b013e3182a541a4
- [33] B Sañudo, et al. "Clinical Approaches of Whole-Body Vibration Exercises in Individuals with Stroke: A Narrative Revision." *Rehabilitation Research and Practice* 2018(2018):1-8.doi:10.1155/2018/8180901
- [34] Murillo, N. , et al. "Focal vibration in neurorehabilitation." *European journal of physical and rehabilitation medicine* 50.2(2014):231-242.doi:10.1186/1743-0003-11-47
- [35] Liao, Lin-Rong, et al. "Cardiovascular stress induced by whole-body vibration exercise in individuals with chronic stroke." *Physical therapy* 95.7 (2015): 966-977.doi:10.2522/ptj.20140295
- [36] Alashram, Anas R., Elvira Padua, and Giuseppe Annino. "Effects of whole-body vibration on motor impairments in patients with neurological disorders: a systematic review." *American journal of physical medicine & rehabilitation* 98.12(2019): 1084-1098. doi:10.1097/PHM.0000000000001252
- [37] Binder, Christian, Ali Ekber Kaya, and Joachim Liepert. "Vibration prolongs the cortical silent period in an antagonistic muscle." *Muscle & Nerve: Official Journal of the American Association of Electrodiagnostic Medicine* 39.6 (2009): 776-780.doi:10.1002/mus.21240
- [38] Issurin, V. B. , and G. Tenenbaum . "Acute and residual effects of vibratory stimulation on explosive strength in elite and amateur athletes." *Journal of Sports Sciences* 17.3(1999):177-182.doi:10.1080/026404199366073
- [39] Kamps, A., and K. Schüle. "Cyclic movement training of the lower limb in stroke rehabilitation." *Neurol Rehabil* 11.5 (2005): 1-12.doi:http://dx.doi.org/
- [40] Hoffman et al. Better reporting of interventions: template for intervention description and replication (TIDieR) checklist and guide. *BMJ* 2014; 348 doi: https://doi.org/10.1136/bmj.g1687
- [41] O'Shea, Jacinta, et al. "Functional specificity of human premotor–motor cortical interactions during action selection." *European Journal of Neuroscience* 26.7 (2007): 2085-2095.doi: 10.1111/j.1460-9568.2007.05795.x
- [42] Pontes, Sarah Souza, et al. "Effects of isokinetic muscle strengthening on muscle strength, mobility, and gait in post-stroke patients: a systematic review and meta-analysis." *Clinical rehabilitation* 33.3 (2019): 381-394.doi:10.1177/0269215518815220
- [43] Kujirai, T. , et al. "Corticocortical inhibition in human motor cortex." *Journal of Physiology* 471.1(1993):501–519.doi:10.1113/jphysiol.1993.sp019912
- [44] Ziemann, U. , J. C. Rothwell , and M. C. Ridding . "Interaction between intracortical inhibition and facilitation in human motor cortex." *Journal of Physiology* 496.Pt 3(1996):873–881.doi:10.1113/jphysiol.1996.sp021734
- [45] Zheng, Y. , et al. "Selective serotonin reuptake inhibition modulates response inhibition in Parkinson's disease." *Brain* 137.4(2014):1145-1155. doi:10.1093/brain/awu032
- [46] Wang, Yanqiu, et al. "Hemispheric Differences in Functional Interactions Between the Dorsal Lateral Prefrontal Cortex and Ipsilateral Motor Cortex." *Frontiers in Human Neuroscience* 14 (2020): 202. doi:10.3389/fnhum.2020.00202

- 1  
2  
3  
4  
5 [47] Nascimento, L. R. , et al. "Strength deficits of the shoulder complex during isokinetic testing  
6 in people with chronic stroke." *Brazilian Journal of Physical Therapy*  
7 18.3(2014):268.doi:10.1590/bjpt-rbf.2014.0030  
8 [48] Farrell Iii, John W., Jordan Merkas, and Lara A. Pilutti. The Effect of Exercise Training on  
9 Gait, Balance, and Physical Fitness Asymmetries in Persons With Chronic Neurological  
10 Conditions: A Systematic Review of Randomized Controlled Trials[J]. *Frontiers in*  
11 *Physiology* 2020, 11: 1316.doi:10.3389/fphys.2020.585765  
12 [49] Fernandez-Gonzalo, Rodrigo, et al. "Muscle, functional and cognitive adaptations after  
13 flywheel resistance training in stroke patients: a pilot randomized controlled trial." *Journal of*  
14 *neuroengineering and rehabilitation* 13.1 (2016): 1-11.doi:10.1186/s12984-016-0144-7  
15 [50] Munari, Daniele, et al. "High-intensity treadmill training improves gait ability, VO<sub>2</sub>peak and  
16 cost of walking in stroke survivors: preliminary results of a pilot randomized controlled trial." *Eur*  
17 *J Phys Rehabil Med* 54.3 (2018): 408-418.doi:10.23736/S1973-9087.16.04224-6  
18 [51] Gordon, C. D. , R. Wilks , and A. Mccaw-Binns . "Effect of aerobic exercise (walking)  
19 training on functional status and health-related quality of life in chronic stroke survivors: a  
20 randomized controlled trial." *Stroke* 44.4(2013):1179-1181.doi:  
21 10.1161/STROKEAHA.111.000642  
22 [52] Gao F. *The application of MoCA test and DTI in mild cognitive impairment. Diss.* MA thesis.  
23 PLA Military Medical Training College, 2008.  
24  
25  
26  
27  
28  
29  
30  
31  
32  
33  
34  
35  
36  
37  
38  
39  
40  
41  
42  
43  
44  
45  
46  
47  
48  
49  
50  
51  
52  
53  
54  
55  
56  
57  
58  
59  
60

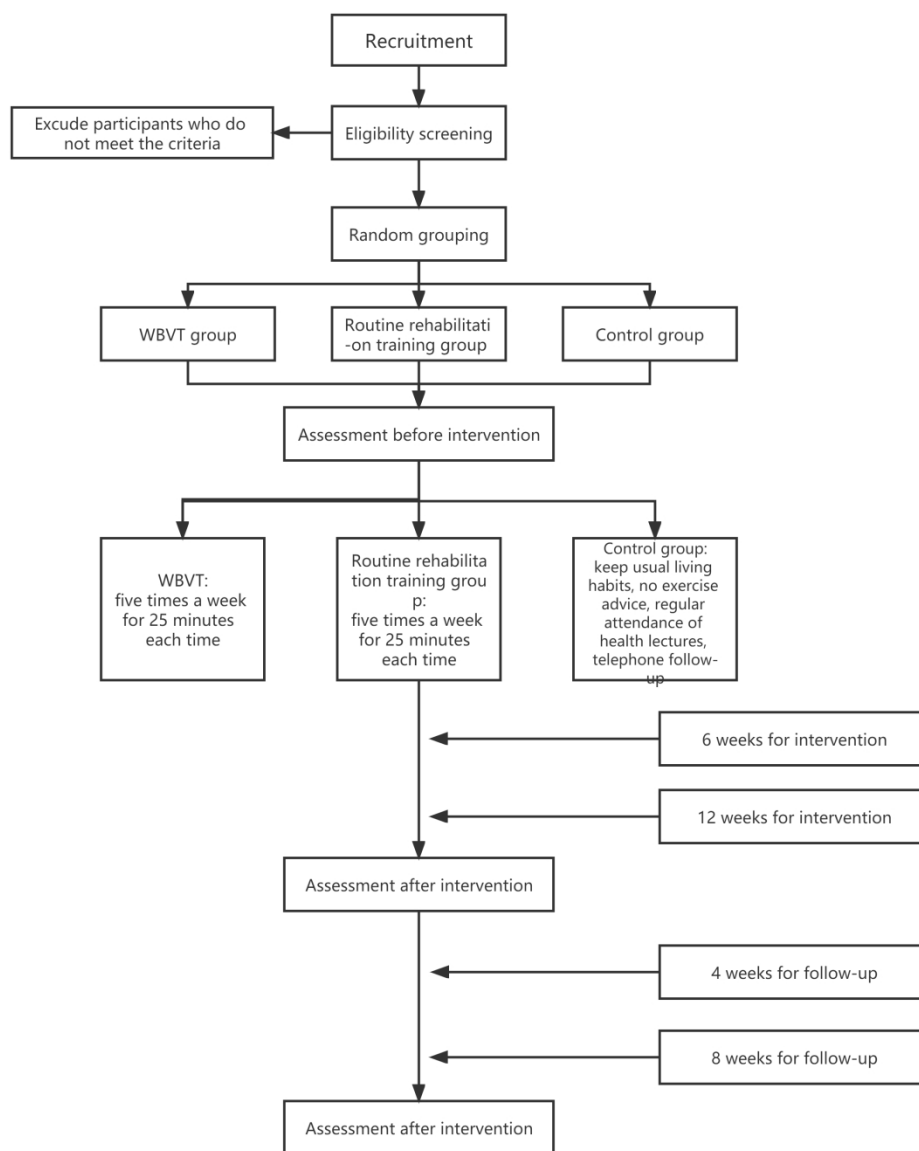

840x1029mm (72 x 72 DPI)

1  
2  
3  
4  
5  
6  
7  
8  
9  
10  
11  
12  
13  
14  
15  
16  
17  
18  
19  
20  
21  
22  
23  
24  
25  
26  
27  
28  
29  
30  
31  
32  
33  
34  
35  
36  
37  
38  
39  
40  
41  
42  
43  
44  
45  
46  
47  
48  
49  
50  
51  
52  
53  
54  
55  
56  
57  
58  
59  
60

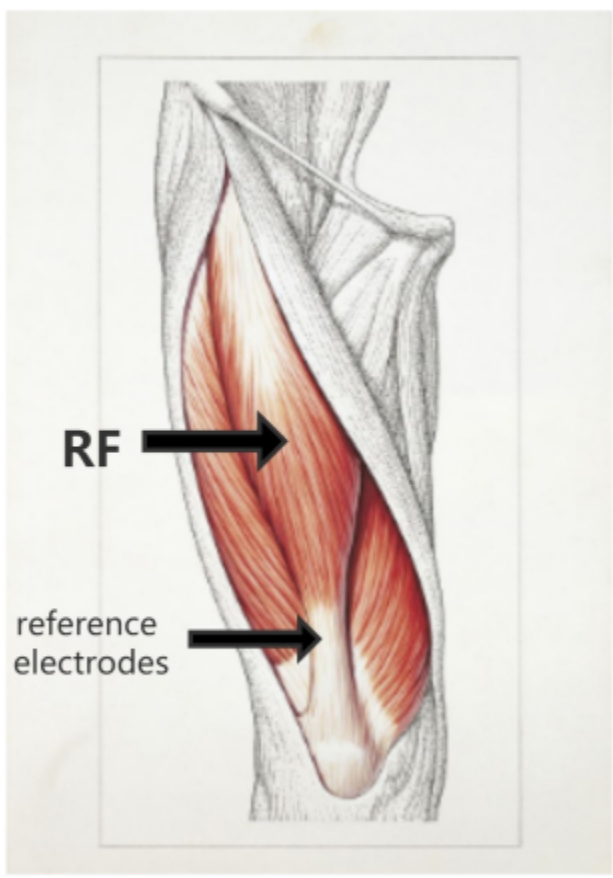

Figure 2 EMG acquisition site  
69x86mm (144 x 144 DPI)

# Reporting checklist for protocol of a clinical trial.

Based on the SPIRIT guidelines.

## Instructions to authors

Complete this checklist by entering the page numbers from your manuscript where readers will find each of the items listed below.

Your article may not currently address all the items on the checklist. Please modify your text to include the missing information. If you are certain that an item does not apply, please write "n/a" and provide a short explanation.

Upload your completed checklist as an extra file when you submit to a journal.

In your methods section, say that you used the SPIRIT reporting guidelines, and cite them as:

Chan A-W, Tetzlaff JM, Gøtzsche PC, Altman DG, Mann H, Berlin J, Dickersin K, Hróbjartsson A, Schulz KF, Parulekar WR, Krleža-Jerić K, Laupacis A, Moher D. SPIRIT 2013 Explanation and Elaboration: Guidance for protocols of clinical trials. *BMJ*. 2013;346:e7586

|                                   | Reporting Item                                                                                                                                                                           | Page Number |
|-----------------------------------|------------------------------------------------------------------------------------------------------------------------------------------------------------------------------------------|-------------|
| <b>Administrative information</b> |                                                                                                                                                                                          |             |
| Title                             | <a href="#">#1</a> Effects of whole-body vibration training on lower-limb motor function and neural plasticity in stroke patients: protocol for a randomized controlled clinical trial   | 3           |
| Trial registration                | <a href="#">#2a</a> This study has been registered prospectively in the Chinese Clinical Trial Registry(ChiCTR2200055143)                                                                | 3           |
| Trial registration: data set      | <a href="#">#2b</a> 2022.1-2023.5                                                                                                                                                        |             |
| Protocol version                  | <a href="#">#3</a> 2022.3-2022.10                                                                                                                                                        |             |
| Funding                           | <a href="#">#4</a> This study was supported by grants from the Research supported by The Program for Overseas High-level talents at Shanghai Institutions of Higher Learning (TP2020063) | 16          |
| Roles and                         | <a href="#">#5a</a> Mingkai Zhang:Data curation, Writing- Original draft                                                                                                                 | 16          |



responsibilities: preparation, Writing- Reviewing and Editing.

contributorship

Roles and [#5b](#)

responsibilities:

sponsor contact

information

Roles and [#5c](#)

responsibilities:

sponsor and funder

Roles and [#5d](#)

responsibilities:

committees

Jianing Wei: Visualization, Investigation. Xueping

Wu: Conceptualization, Methodology, Software/Priya.

16

## Introduction

Background and [#6a](#)

rationale

Stroke is prevalent and associated with high disability, recurrence, 3

and mortality rates. Stroke patients often have a variety of sequelae. The most common is hemiplegia, which is characterized by numbness and weakness of one limb and continuous increases in muscle tension. The improvement of affected patients' muscle strength, balance, and walking ability is key to the improvement of their lower-limb motor function. Changes in neural plasticity after stroke have been shown to be the basis for the recovery of motor function.

Changes in neural plasticity after stroke have been shown to be the basis for the recovery of motor function. In addition to improving muscle strength and joint activity, exercise intervention therapy can aid the recovery of neural plasticity and brain function, thereby promoting the recovery of motor function. The key to effective rehabilitation is to give patients greater motor stimulation within their limited range of activities.

As a passive training method, whole-body vibration training (WBVT) involves the generation of mechanical waves through a training platform to stimulate muscle vibration and neuromuscular regulation and adaptation. It has also been found to effectively improve the lower-limb muscle strength, spasm, walking ability, and balance of many people, including stroke patients.



|    |                           |                      |                                                                      |   |
|----|---------------------------|----------------------|----------------------------------------------------------------------|---|
| 1  | Background and            | <a href="#">#6b</a>  |                                                                      |   |
| 2  | rationale: choice of      |                      |                                                                      |   |
| 3  | comparators               |                      |                                                                      |   |
| 4  |                           |                      |                                                                      |   |
| 5  |                           |                      |                                                                      |   |
| 6  | Objectives                | <a href="#">#7</a>   | We aim to determine the effect of 12 weeks of WBVT on stroke         | 6 |
| 7  |                           |                      | patients' lower-limb motor function and neural plasticity, and       |   |
| 8  |                           |                      | explore the difference between wbvt and routine rehabilitation       |   |
| 9  |                           |                      | training after 6 and 12 weeks of training. In addition, we will      |   |
| 10 |                           |                      | evaluate and compare it after 4 and 8 weeks of stopping training.    |   |
| 11 |                           |                      | We will also assess the feasibility of a future full-scale RCT.      |   |
| 12 |                           |                      |                                                                      |   |
| 13 |                           |                      |                                                                      |   |
| 14 |                           |                      |                                                                      |   |
| 15 |                           |                      |                                                                      |   |
| 16 | Trial design              | <a href="#">#8</a>   | This study was designed as a prospective single-blind RCT.           | 6 |
| 17 |                           |                      | Eligible participants with stroke will be assigned randomly to the   |   |
| 18 |                           |                      | whole-body vibration training group (WBVG), routine                  |   |
| 19 |                           |                      | rehabilitation training group (RRTG), and control group (CG) at a    |   |
| 20 |                           |                      | ratio of 1:1:1. The WBVG and RRTG will receive exercise              |   |
| 21 |                           |                      | interventions in the Sports Laboratory of Shanghai University of     |   |
| 22 |                           |                      | Sport, Shanghai, China. The CG will maintain their routine daily     |   |
| 23 |                           |                      | lives. The interventions will be implemented 5 times a week for      |   |
| 24 |                           |                      | 12 weeks. Participants will be evaluated at baseline, after 6 and 12 |   |
| 25 |                           |                      | weeks of intervention, and 4 and 8 weeks after intervention          |   |
| 26 |                           |                      | termination                                                          |   |
| 27 |                           |                      |                                                                      |   |
| 28 |                           |                      |                                                                      |   |
| 29 |                           |                      |                                                                      |   |
| 30 |                           |                      |                                                                      |   |
| 31 |                           |                      |                                                                      |   |
| 32 |                           |                      |                                                                      |   |
| 33 | <b>Methods:</b>           |                      |                                                                      |   |
| 34 | <b>Participants,</b>      |                      |                                                                      |   |
| 35 | <b>interventions, and</b> |                      |                                                                      |   |
| 36 | <b>outcomes</b>           |                      |                                                                      |   |
| 37 |                           |                      |                                                                      |   |
| 38 |                           |                      |                                                                      |   |
| 39 |                           |                      |                                                                      |   |
| 40 | Study setting             | <a href="#">#9</a>   | Shanghai university of sport, Shanghai, China                        |   |
| 41 |                           |                      |                                                                      |   |
| 42 | Eligibility criteria      | <a href="#">#10</a>  | 1) clinical diagnosis of first ischemic or hemorrhagic stroke, 2)    | 7 |
| 43 |                           |                      | Montreal Cognitive Assessment (MoCA) score > 20, 3)                  |   |
| 44 |                           |                      | Brunnstrom stage III or IV, 4) ability to stand and walk without     |   |
| 45 |                           |                      | the help of another person, 5) stable medical condition, and 6)      |   |
| 46 |                           |                      | duration of illness ≥ 6 months                                       |   |
| 47 |                           |                      |                                                                      |   |
| 48 |                           |                      |                                                                      |   |
| 49 |                           |                      |                                                                      |   |
| 50 |                           |                      |                                                                      |   |
| 51 | Interventions:            | <a href="#">#11a</a> | <b>Table 2.</b> Vibration training schedule                          | 8 |
| 52 | description               |                      | <b>Table 3.</b> Routine rehabilitation training                      |   |
| 53 |                           |                      | <b>Table 5.</b> Intervention overview                                |   |
| 54 |                           |                      |                                                                      |   |
| 55 |                           |                      |                                                                      |   |
| 56 |                           |                      |                                                                      |   |
| 57 |                           |                      |                                                                      |   |
| 58 |                           |                      |                                                                      |   |
| 59 |                           |                      |                                                                      |   |
| 60 |                           |                      |                                                                      |   |

|    |                      |                      |                                                                                                                 |    |
|----|----------------------|----------------------|-----------------------------------------------------------------------------------------------------------------|----|
| 1  | Interventions:       | <a href="#">#11b</a> | <b>Table 5.</b> Intervention overview                                                                           | 10 |
| 2  | modifications        |                      |                                                                                                                 |    |
| 3  |                      |                      |                                                                                                                 |    |
| 4  |                      |                      |                                                                                                                 |    |
| 5  | Interventions:       | <a href="#">#11c</a> | <b>Table 5.</b> Intervention overview                                                                           | 10 |
| 6  | adherence            |                      |                                                                                                                 |    |
| 7  |                      |                      |                                                                                                                 |    |
| 8  |                      |                      |                                                                                                                 |    |
| 9  |                      |                      |                                                                                                                 |    |
| 10 | Interventions:       | <a href="#">#11d</a> | <b>Table 5.</b> Intervention overview                                                                           | 10 |
| 11 | concomitant care     |                      |                                                                                                                 |    |
| 12 |                      |                      |                                                                                                                 |    |
| 13 |                      |                      |                                                                                                                 |    |
| 14 |                      |                      |                                                                                                                 |    |
| 15 | Outcomes             | <a href="#">#12</a>  | <b>Neural plasticity:</b> MEP amplitude,Short-interval intracortical inhibition (SICI) ,M1-pre-SMA connectivity | 12 |
| 16 |                      |                      |                                                                                                                 |    |
| 17 |                      |                      |                                                                                                                 |    |
| 18 |                      |                      |                                                                                                                 |    |
| 19 |                      |                      | <b>Lower-limb motor function:</b> Peak torque,Brunnstrom                                                        |    |
| 20 |                      |                      | stage,Fugl-Meyer assessment,Timed up-and-go test,Berg                                                           |    |
| 21 |                      |                      | balance test,36-item Short Form Survey                                                                          |    |
| 22 |                      |                      |                                                                                                                 |    |
| 23 |                      |                      |                                                                                                                 |    |
| 24 |                      |                      |                                                                                                                 |    |
| 25 |                      |                      |                                                                                                                 |    |
| 26 |                      |                      |                                                                                                                 |    |
| 27 |                      |                      |                                                                                                                 |    |
| 28 |                      |                      |                                                                                                                 |    |
| 29 |                      |                      |                                                                                                                 |    |
| 30 |                      |                      |                                                                                                                 |    |
| 31 |                      |                      |                                                                                                                 |    |
| 32 |                      |                      |                                                                                                                 |    |
| 33 |                      |                      |                                                                                                                 |    |
| 34 |                      |                      |                                                                                                                 |    |
| 35 |                      |                      |                                                                                                                 |    |
| 36 |                      |                      |                                                                                                                 |    |
| 37 |                      |                      |                                                                                                                 |    |
| 38 |                      |                      |                                                                                                                 |    |
| 39 |                      |                      |                                                                                                                 |    |
| 40 |                      |                      |                                                                                                                 |    |
| 41 |                      |                      |                                                                                                                 |    |
| 42 |                      |                      |                                                                                                                 |    |
| 43 |                      |                      |                                                                                                                 |    |
| 44 |                      |                      |                                                                                                                 |    |
| 45 |                      |                      |                                                                                                                 |    |
| 46 |                      |                      |                                                                                                                 |    |
| 47 | Participant timeline | <a href="#">#13</a>  | This study was designed as a prospective single-blind RCT.                                                      | 6  |
| 48 |                      |                      | Eligible participants with stroke will be assigned randomly to the                                              |    |
| 49 |                      |                      | whole-body vibration training group (WBVG), routine                                                             |    |
| 50 |                      |                      | rehabilitation training group (RRTG), and control group (CG) at a                                               |    |
| 51 |                      |                      | ratio of 1:1:1. The WBVG and RRTG will receive exercise                                                         |    |
| 52 |                      |                      | interventions in the Sports Laboratory of Shanghai University of                                                |    |
| 53 |                      |                      | Sport, Shanghai, China. The CG will maintain their routine daily                                                |    |
| 54 |                      |                      | lives. The interventions will be implemented 5 times a week for                                                 |    |
| 55 |                      |                      |                                                                                                                 |    |
| 56 |                      |                      |                                                                                                                 |    |
| 57 |                      |                      |                                                                                                                 |    |
| 58 |                      |                      |                                                                                                                 |    |
| 59 |                      |                      |                                                                                                                 |    |
| 60 |                      |                      |                                                                                                                 |    |

12 weeks. Participants will be evaluated at baseline, after 6 and 12 weeks of intervention, and 4 and 8 weeks after intervention termination

|                                                                                         |             |                     |                                                                                                                                                                                                                                                                                                                                                                                                                                                                                                                                                                                                           |   |
|-----------------------------------------------------------------------------------------|-------------|---------------------|-----------------------------------------------------------------------------------------------------------------------------------------------------------------------------------------------------------------------------------------------------------------------------------------------------------------------------------------------------------------------------------------------------------------------------------------------------------------------------------------------------------------------------------------------------------------------------------------------------------|---|
| 5<br>6<br>7<br>8<br>9<br>10<br>11<br>12<br>13<br>14<br>15<br>16<br>17<br>18<br>19<br>20 | Sample size | <a href="#">#14</a> | The sample size has been estimated using the G*power statistical software (version 3.1.9.2 for Windows 7 X64; Franz Faul, Kiel University, Germany), used widely for this purpose. In this part of the study, the sample size was estimated by F tests: analysis of variance (ANOVA): related measures, between factors: computer required sample size. Under the significance level of 0.05 and repeated-measures ANOVA setting of 80% efficacy, the total number of subjects needed was determined to be 42 (14 per group). Considering a 20% loss rate, we plan to recruit 60 subjects (20 per group). | 8 |
| 21<br>22<br>23<br>24<br>25<br>26<br>27                                                  | Recruitment | <a href="#">#15</a> | Participants in Shanghai will be recruited through community outreach, from outpatient clinics, with media advertising, and by telephone. All participants will follow their routine medication and physical therapy/massage regimens during the study period                                                                                                                                                                                                                                                                                                                                             | 7 |

28 **Methods:**  
29 **Assignment of**  
30 **interventions (for**  
31 **controlled trials)**

|                                                                                                                                  |                                  |                      |                                                                                                                                                                                                                                                                                                                                                                                                                                                                                                                                                                                                                                                                                                                                         |   |
|----------------------------------------------------------------------------------------------------------------------------------|----------------------------------|----------------------|-----------------------------------------------------------------------------------------------------------------------------------------------------------------------------------------------------------------------------------------------------------------------------------------------------------------------------------------------------------------------------------------------------------------------------------------------------------------------------------------------------------------------------------------------------------------------------------------------------------------------------------------------------------------------------------------------------------------------------------------|---|
| 32<br>33<br>34<br>35<br>36<br>37<br>38<br>39<br>40<br>41<br>42<br>43<br>44<br>45<br>46<br>47<br>48<br>49<br>50<br>51<br>52<br>53 | Allocation: sequence generation  | <a href="#">#16a</a> | This study was designed as a prospective single-blind RCT. Eligible participants with stroke will be assigned randomly to the whole-body vibration training group (WBVG), routine rehabilitation training group (RRTG), and control group (CG) at a ratio of 1:1:1. The WBVG and RRTG will receive exercise interventions in the Sports Laboratory of Shanghai University of Sport, Shanghai, China. The CG will maintain their routine daily lives. Numbers (1–60) will be assigned to the participants according to their recruitment times in an Excel software database, and then a random sequence will be generated using the "= rand ()" formula. This sequence will be sorted to allocate the participants to the study groups. | 8 |
| 54<br>55<br>56<br>57<br>58<br>59<br>60                                                                                           | Allocation concealment mechanism | <a href="#">#16b</a> | This study was designed as a prospective single-blind RCT. Eligible participants with stroke will be assigned randomly to the whole-body vibration training group (WBVG), routine rehabilitation training group (RRTG), and control group (CG) at a                                                                                                                                                                                                                                                                                                                                                                                                                                                                                     | 8 |

ratio of 1:1:1. The WBVG and RRTG will receive exercise interventions in the Sports Laboratory of Shanghai University of Sport, Shanghai, China. The CG will maintain their routine daily lives. Numbers (1–60) will be assigned to the participants according to their recruitment times in an Excel software database, and then a random sequence will be generated using the "= rand ()" formula. This sequence will be sorted to allocate the participants to the study groups.

|    |                                                                       |                      |                                                                                                                                                                                                                                                                                                                                                                                                                                                                                                                                |
|----|-----------------------------------------------------------------------|----------------------|--------------------------------------------------------------------------------------------------------------------------------------------------------------------------------------------------------------------------------------------------------------------------------------------------------------------------------------------------------------------------------------------------------------------------------------------------------------------------------------------------------------------------------|
| 13 | Allocation:                                                           | <a href="#">#16c</a> |                                                                                                                                                                                                                                                                                                                                                                                                                                                                                                                                |
| 14 | implementation                                                        |                      |                                                                                                                                                                                                                                                                                                                                                                                                                                                                                                                                |
| 17 | Blinding (masking)                                                    | <a href="#">#17a</a> | The data is analyzed by specialized PhD students, they analyse the data be blind to group allocation.                                                                                                                                                                                                                                                                                                                                                                                                                          |
| 23 | Blinding (masking):<br>emergency<br>unblinding                        | <a href="#">#17b</a> | After the results are processed, the grouping can be announced                                                                                                                                                                                                                                                                                                                                                                                                                                                                 |
| 28 | <b>Methods: Data<br/>collection,<br/>management, and<br/>analysis</b> |                      |                                                                                                                                                                                                                                                                                                                                                                                                                                                                                                                                |
| 35 | Data collection plan                                                  | <a href="#">#18a</a> | The data is analyzed by specialized PhD students                                                                                                                                                                                                                                                                                                                                                                                                                                                                               |
| 39 | Data collection plan:<br>retention                                    | <a href="#">#18b</a> |                                                                                                                                                                                                                                                                                                                                                                                                                                                                                                                                |
| 43 | Data management                                                       | <a href="#">#19</a>  | The data is analyzed by specialized PhD students                                                                                                                                                                                                                                                                                                                                                                                                                                                                               |
| 48 | Statistics: outcomes                                                  | <a href="#">#20a</a> | The statistical analysis will be performed by designated members of the research group who will be blinded to participants' group allocations. All statistical analyses will be conducted using IBM SPSS 24.0. All quantitative data will be summarized and presented using appropriate descriptive statistics, and baseline data from the WBVG , RRTG and CG will be analyzed using the independent-samples <i>t</i> test. To explore the effects of the training interventions on stroke patients' motor function and neural |

14

plasticity, repeated-measures analysis of variance will be used to examine differences in outcomes between and within groups at all assessment timepoints

Statistics: additional analyses [#20b](#)

Statistics: analysis population and missing data [#20c](#)

## Methods: Monitoring

Data monitoring: formal committee [#21a](#) The data is analyzed by specialized PhD students, they analyse the data be blind to group allocation.

Data monitoring: interim analysis [#21b](#)

Harms [#22](#) In the Participants gave an informed consent form

Auditing [#23](#) In the Participants gave an informed consent form

## Ethics and dissemination

Research ethics approval [#24](#) This study has been approved by the Shanghai University of Sport Research Ethics Committee (102772021RT067) 3

Protocol amendments [#25](#) Upload as attachment

Consent or assent [#26a](#) PhD students in charge of data collection will collect data within the TMS and lower limbs function will be conducted before the intervention as well as at 6 weeks, 12 weeks, and 4 weeks and 8weeks after the intervention

Consent or assent: [#26b](#)

1 ancillary studies

2 Confidentiality [#27](#) Professor Wu, who is in charge of recruitment, completes the  
3  
4 participant information management.  
5  
6

7  
8  
9 Declaration of [#28](#) The authors have no conflicts of interest to declare  
10 interests  
11  
12

13  
14 Data access [#29](#) The result will be made public by the person in charge of the Research  
15 supported by The Program for Overseas High-level talents at  
16 Shanghai Institutions of Higher Learning (TP2020063)  
17  
18  
19  
20  
21  
22

23  
24 Ancillary and post [#30](#) In the Participants gave an informed consent form.  
25 trial care  
26  
27

28 Dissemination policy: [#31a](#) This study has been registered prospectively in the Chinese  
29 trial results Clinical Trail Registry(ChiCTR2200055143,1 January 2022).It  
30 will be published in accordance with the standards of the Chinese  
31 Clinical Trial Registry  
32  
33  
34  
35  
36

37 Dissemination policy: [#31b](#) It will be written in accordance with the standards of the Chinese  
38 authorship Clinical Trial Registry.  
39  
40  
41  
42  
43

44 Dissemination policy: [#31c](#) It can be viewed in the Chinese Clinical Trial Registry.  
45 reproducible  
46 research  
47  
48

## 49 **Appendices**

50  
51 Informed consent [#32](#) Upload as attachment.  
52 materials  
53  
54  
55

56 Biological specimens [#33](#) None  
57  
58  
59  
60

1 None The SPIRIT Explanation and Elaboration paper is distributed under the terms of the Creative  
2 Commons Attribution License CC-BY-NC. This checklist can be completed online using  
3 <https://www.goodreports.org/>, a tool made by the [EQUATOR Network](#) in collaboration with  
4 [Penelope.ai](#)  
5  
6  
7  
8  
9  
10  
11  
12  
13  
14  
15  
16  
17  
18  
19  
20  
21  
22  
23  
24  
25  
26  
27  
28  
29  
30  
31  
32  
33  
34  
35  
36  
37  
38  
39  
40  
41  
42  
43  
44  
45  
46  
47  
48  
49  
50  
51  
52  
53  
54  
55  
56  
57  
58  
59  
60

For peer review only

# BMJ Open

## Effects of whole-body vibration training on lower-limb motor function and neural plasticity in stroke patients: protocol for a randomized controlled clinical trial

|                                 |                                                                                                                                                               |
|---------------------------------|---------------------------------------------------------------------------------------------------------------------------------------------------------------|
| Journal:                        | <i>BMJ Open</i>                                                                                                                                               |
| Manuscript ID                   | bmjopen-2022-060796.R2                                                                                                                                        |
| Article Type:                   | Protocol                                                                                                                                                      |
| Date Submitted by the Author:   | 07-Jun-2022                                                                                                                                                   |
| Complete List of Authors:       | Zhang, Mingkai; Shanghai University of Sport<br>jianing, wei; Shanghai University of Sport, School of Psychology<br>Wu, Xueping; Shanghai University of Sport |
| <b>Primary Subject Heading</b>: | Sports and exercise medicine                                                                                                                                  |
| Secondary Subject Heading:      | Sports and exercise medicine                                                                                                                                  |
| Keywords:                       | Stroke < NEUROLOGY, SPORTS MEDICINE, REHABILITATION MEDICINE                                                                                                  |
|                                 |                                                                                                                                                               |

SCHOLARONE™  
Manuscripts



1  
2  
3 **Title:** Effects of whole-body vibration training on lower-limb motor function and  
4 neural plasticity in stroke patients: protocol for a randomized controlled clinical trial  
5

6 **Article Type:** Clinical Study Protocol  
7

8  
9 **Keywords:** Stroke; Whole-body vibration training; Lower-limbs; Neural plasticity;  
10

11 Study protocol  
12

13  
14 **Authors:** Mingkai Zhang<sup>1</sup>, Jianing Wei<sup>2</sup>, Xueping Wu<sup>1\*</sup>  
15

16  
17 **Affiliation:**  
18

19 <sup>1</sup> Shanghai University of Sport, Shanghai, China  
20

21  
22 <sup>2</sup> School of Psychology, Shanghai University of Sport, Shanghai, China  
23

24  
25 **\* Corresponding author:**  
26

27 Xueping Wu  
28

29 Shanghai University of Sport  
30

31  
32 650 Qing Yuan Huan Road, Shanghai, China, 200438  
33

34  
35 E-mail: wuxueping@sus.edu.cn  
36

37  
38 **Figures and tables:** 2 figures and 6 tables  
39

40  
41 **Number of Words:** Abstract: 260 words; Manuscript: 4,339 words  
42  
43  
44  
45  
46  
47  
48  
49  
50  
51  
52  
53  
54  
55  
56  
57  
58  
59  
60

## Abbreviations

WBVT, Whole-body vibration training

RRT, routine rehabilitation training

MEP, Motor evoked potential

Pre-SMA, pre-supplementary motor area

FMA, Fugl-Meyer assessment

TUG, Timed up and go

# Effects of whole-body vibration training on lower-limb motor function and neural plasticity in stroke patients: protocol for a randomized controlled clinical trial

## ABSTRACT

**Introduction** Lower-limb motor dysfunction is common in stroke patients, and usually caused by brain neural connectivity disorder. Previous studies have shown that the whole-body vibration training (WBVT) significantly improves the lower-limb motor function in stroke patients, and may promote nerve remodeling. The prior purpose of this study is to explore effects of WBVT on lower-limb motor function and neuroplasticity in stroke patients.

**Methods** A single-blind randomized controlled trial will be conducted. Sixty stroke patients will be recruited and allocated randomly to WBVT, routine rehabilitation training (RRT), and control group (CG). The WBVT and RRT interventions will be implemented as five 25-min sessions weekly for continuous 12 weeks; the CG will remain daily habitual living styles and routine treatments, in community or hospital, and will also receive telephone follow-up and health-related lectures. Transcranial magnetic stimulation will be used to assess neural plasticity while lower-limb motor function is assessed using indicators of strength, walking ability, and joint activity. The assessments will be conducted at the period of baseline, Week 6, Week 12, as well as upon 4 and 8 weeks respectively after intervention completion.

**Ethics and dissemination** This study has been approved by the Shanghai University of Sport Research Ethics Committee (102772021RT067) and will provide data on the effects of WBVT relative to RRT in terms of the improvement of stroke patients' lower-limb motor function and neural plasticity. The results of this study will be disseminated via publications in peer-reviewed journals and presentations at international conference.

**Trail registration number:** This study has been registered prospectively in the Chinese Clinical Trail Registry (ChiCTR2200055143, 1 January 2022).

### Strengths and limitations of this study

1. This protocol presents a rigorous design of a randomized controlled trial that aims to explore the effects of WBVT on lower-limb motor function and neuroplasticity in patients who had a stroke.
2. An accurate measurement tool and multiple indicators will be used to judge the effects of WBVT on neuroplasticity in patients who had a stroke.
3. The patients will come from one geographic area which limits the generalisability.

## INTRODUCTION

Stroke is prevalent and associated with high disability, recurrence, and mortality rates.<sup>[1]</sup> The latest global burden of disease study demonstrates that the overall lifetime risk of stroke in China is 39.9%, ranking the first in the world, stroke is also the leading cause among diseases of lost years of life in China.<sup>[2]</sup> Stroke patients often have a variety of sequelae. The most common is hemiplegia, which is characterized by numbness, weakness of one limb and spasticity. It significantly reduces patients' abilities to perform daily activities and impacts their quality of life.<sup>[3]</sup> Lower-limb motor function can be restored to a limited extent in more than 70% of hemiplegic patients, and most of such cannot obtain a good gait or walking speed.<sup>[4]</sup> Lower-limb motor dysfunction after stroke is caused by central nervous system injuries resulting in abnormal movement patterns.<sup>[5]</sup> Its main characteristics are poor muscle strength,<sup>[6]</sup> spasticity,<sup>[5]</sup> joint instability,<sup>[7]</sup> associated reactions,<sup>[8]</sup> and synergy movement.<sup>[9]</sup> Thus, the improvement of affected patients' muscle strength, balance ability, and walking ability is critical in restoring their lower-limb motor function.

Neural plasticity generally refers to the nervous system's inherent abilities to make structural and functional changes to adapt to changes in the internal and external environments.<sup>[10]</sup> Changes in neural plasticity after stroke have been shown to be the foundation of the recovery of motor function.<sup>[11]</sup> After unilateral stroke, the neural plasticity includes two aspects: a) changes in neural synaptic connections and b) changes in the excitability of various structures. Functional recovery after stroke is related to changes in the motor cortex and other regions regarding the brain's anatomical structure and function.<sup>[12]</sup> The presence of lesions on one side of the cerebral hemisphere reduces or inhibits the excitability of the motor cortex on that side, while the cortex of the contralateral hemisphere will be hyperexcitable.<sup>[13]</sup> Therefore, maladaptive neural plasticity exists, which regard to the hindered functional recovery of the development of an unwanted symptom, such as compensatory movement pattern, delayed-onset involuntary abnormal movement.<sup>[14]</sup> The primary motor cortex (M1) provides the main outputs to the descending motor system and autonomous motor commands. Such mechanism is closely linked to somatosensory and spatial processing in the parietal lobe, premotor cortex, and supplementary motor area; therefore, changes in M1's excitability will affect motor function.<sup>[15]</sup> M1 is also defined as the scalp site where the minimum stimulation intensity causes the maximum motor evoked potential (MEP) of the muscle. Thus, changes in the MEP reflect the conditions of motor function.<sup>[16]</sup> The pre-supplementary motor area (pre-SMA), located in between the prefrontal lobe and motor system, is responsible for functions such as language and idea generation, action recognition, working memory maintenance, learning, and the execution of action sequences.<sup>[17]</sup> The enhancement of pre-SMA activity has been found to alleviate M1 disorders in stroke patients, and changes in connectivity between motor areas may contribute to the improvements of the patients' motor function.<sup>[18]</sup> Therefore, the recovery of lower-limb motor function in stroke

1  
2  
3 patients correlates to the functional connectivity between cerebral hemispheres, as well  
4 as the normalization of the bilateral sensorimotor cortical network.  
5

6 Exercise intervention therapy has the advantages of compliance, minimal side  
7 effects, and strong operability. It has become an important means of rehabilitation for  
8 stroke patients<sup>[19]</sup>. Functional recovery after stroke is a complex process. The repeated  
9 sensory input is among the most effective means of improving the cortical structure and  
10 body function<sup>[20]</sup>. In addition, early intervention, task-oriented training, and repetitive  
11 intensity are also determinants of motor function recovery after stroke.<sup>[21]</sup> The repeated  
12 performance of specific actions during exercise has been found to construct motor  
13 memory, which is a form of brain plasticity improvement<sup>[22]</sup>. In addition to improving  
14 muscle strength and joint activity, exercise intervention therapy can aid the  
15 improvement of neural plasticity and brain function, thereby promoting the recovery of  
16 motor function.<sup>[23]</sup> However, patients' defected motor function and executive function  
17 will potentially make it difficult for them to effectively remember and perform complex  
18 rehabilitation. In that way, the effectiveness of rehabilitation is compromised.<sup>[24]</sup> Thus,  
19 the key to an effective rehabilitation is to enable patients to exercise as much as possible  
20 only if within their limited range of physical activity.  
21  
22  
23  
24  
25

26 Whole-body vibration training (WBVT) is an exercise or treatment method used  
27 in sport, physiotherapy and rehabilitation.<sup>[25][26]</sup> During WBVT, people sit, stand, or  
28 exercise on a vibrating platform that generate vibration.<sup>[27]</sup> WBVT was found to activate  
29 the muscle spindles, thereby inducing reflex muscle activation.<sup>[28]</sup> It has also been found  
30 to effectively improve the lower-limb muscle strength,<sup>[29]</sup> spasticity,<sup>[30]</sup> walking  
31 ability,<sup>[31]</sup> and balance<sup>[32]</sup> of many people, including stroke patients.<sup>[33]</sup> In addition, a  
32 review of the clinical application of WBVT in patients with chronic stroke showed that  
33 its main effects include promotion of muscle contraction, stimulation of the  
34 proprioceptive system, and improvement of motor control ability.<sup>[34]</sup> WBVT has also  
35 been shown to increase oxygen consumption and promote the release of vasodilators in  
36 stroke patients, without additional effects on the heart rates or blood pressure.<sup>[35]</sup> Thus,  
37 a period of WBVT can improve blood perfusion on the affected side in stroke  
38 patients.<sup>[36]</sup> In addition, a transcranial magnetic stimulation (TMS) study revealed  
39 significant changes in cortical excitability after vibration training in healthy people<sup>[37]</sup>.  
40 The convergence of evidence from several experimental studies suggests that WBVT  
41 induces the reorganization of sensory motor processes in healthy people's brain.<sup>[29]</sup> It  
42 may also promote functional recovery after stroke by enhancing the proprioceptive  
43 afferents of the central nervous system.<sup>[24]</sup> A previous TMS study demonstrated that  
44 after a period of WBVT, stroke patients have lower motor thresholds and higher MEP  
45 amplitudes, along with improved activation of flexors.<sup>[32]</sup> The study concluded that  
46 WBVT is a suitable nonpharmacological therapy to promote the recovery of neural  
47 plasticity and motor function in stroke patients, even if the patients were in the chronic  
48 phase.<sup>[32]</sup> Thus, WBVT can effectively improve the motor function of stroke patients,  
49 and may also have a strong effect on brain neural plasticity. However, limited research  
50 on this topic has been conducted, and scholars have reached different conclusions. In  
51 addition, the type and parameter of effective WBVT has not been explicitly identified;  
52 further research is needed.  
53  
54  
55  
56  
57  
58  
59  
60

1  
2  
3  
4  
5  
6  
7  
8  
9  
10  
11  
12  
13  
14  
15  
16  
17  
18  
19  
20  
21  
22  
23  
24  
25  
26  
27  
28  
29  
30  
31  
32  
33  
34  
35  
36  
37  
38  
39  
40  
41  
42  
43  
44  
45  
46  
47  
48  
49  
50  
51  
52  
53  
54  
55  
56  
57  
58  
59  
60

In sum, little research has examined the application of WBVT for the rehabilitation of stroke patients, and especially the positive and negative impacts of WBVT on these patients' brain function. Thus, this randomized controlled trial (RCT) was designed to examine the impacts of WBVT on stroke patients' lower-limb motor function and neural plasticity. Lower-limb motor function will be evaluated by isokinetic muscle strength and other assessment method, and TMS will be used to examine changes in neural plasticity.

## AIMS AND OBJECTIVES

This study aims to determine the effect of 12 weeks of WBVT on stroke patients' lower-limb motor function and neural plasticity, and explore the difference between wbvt and routine rehabilitation training after 6 and 12 weeks of training. In addition, this study will evaluate and compare it after 4 and 8 weeks of stopping training. The feasibility of a future full-scale RCT will be assessed.

The study objectives are to:

- a).clarify the effects of WBVT on stroke patients' lower-limb motor function and neural plasticity;
- b).analyze the training effects and maintenance times of the two training methods;
- c).explore the facilitators, barriers, and contextual factors influencing the implementation of WBVT;
- d).test the acceptability of the data collection procedures used.

## METHODS AND DESIGN

### Study design

This study was designed as a prospective single-blind RCT. Eligible participants with stroke will be assigned randomly to the whole-body vibration training group (WBVG), routine rehabilitation training group (RRTG), and control group (CG) at a ratio of 1:1:1. The CG will maintain daily living and routine treatment, in community or hospital, and will also receive telephone follow-up and lectures. On this basis, the WBVG and RRTG will receive exercise interventions in the Sports Laboratory of Shanghai University of Sport, Shanghai, China. The interventions will be implemented 5 times a week for 12 weeks and 25min a day. The training will be arranged from Monday to Friday. Participants will be evaluated at baseline, after 6 and 12 weeks of intervention, and 4 and 8 weeks after intervention termination (Figure 1). This research protocol has been approved by the research ethics committee of Shanghai University of Sport (no. 102772021RT067). The study is scheduled to begin in September 2022 and continue until January 2023.

**Figure 1.** Diagram of study flow.

### Participants

Participants in Shanghai will be recruited through community outreach, from outpatient clinics, with media advertising, and by telephone. All participants will follow

their routine medication and physical therapy/massage regimens during the study period. They will provide written informed consent before inclusion in the study. Before and after the intervention, data on participants' demographic and clinical characteristics will be collected and analyzed (Table 1).

**Table 1.** Demographic and clinical characteristics of participants

|                                     | WBVG | RRTG | CG |
|-------------------------------------|------|------|----|
| Age                                 |      |      |    |
| Gender                              |      |      |    |
| BMI                                 |      |      |    |
| Time of illness                     |      |      |    |
| Stroke type                         |      |      |    |
| Affected side                       |      |      |    |
| Whether auxiliary equipment is used |      |      |    |
| FMA score                           |      |      |    |
| Berg score                          |      |      |    |
| TUG                                 |      |      |    |
| MoCA score                          |      |      |    |
| SF-36                               |      |      |    |

Note: WBVG, Whole-body vibration training group; RRTG, routine rehabilitation training group; CG, control group; BMI, body mass index; FMA, Fugl-Meyer assessment; TUG, Timed up and go; MoCA, Montreal Cognitive Assessment; SF-36, the MOS item short form health survey

### Inclusion and exclusion criteria

The inclusion criteria will be: a) The included cases met the inclusion criteria of stroke in the classification scheme of various cerebrovascular diseases formulated by the Fourth National Academic Conference on cerebrovascular diseases in 1995, and were confirmed by cranial CT or MRI, b) Brunnstrom stage IV, c) ability to stand and walk without the help of another person, d) stable medical condition, e) aged 50-75 years, f) duration of illness  $\geq 3$  months, g) no serious organ disease, h) no vibration training experience. The exclusion criteria will be: a) It does not meet the diagnostic criteria of stroke in the classification scheme of various cerebrovascular diseases formulated by the fourth national cerebrovascular disease academic conference in 1995, and there is no head CT or MRI confirmation; b) other nervous system disease, c) severe skeletal muscle or cardiovascular disease, d) severe lumbar disc herniation, e) dysfunction or failure of the heart, lung, liver, kidney, or other major organ, f) other serious disease or exercise contraindication, and g) vibration training experience.

### Sample size

The sample size has been estimated using the G\*power statistical software (version 3.1.9.2 for Windows 7 X64; Franz Faul, Kiel University, Germany), used widely for this purpose. In this part of the study, the sample size was estimated by F tests: analysis of variance (ANOVA): related measures, between factors: computer



required sample size. Under the significance level of 0.05 and repeated-measures ANOVA setting of 80% efficacy, the total number of subjects needed was determined to be 42 (14 per group). Considering a 20% loss rate, we plan to recruit 60 subjects (20 per group).

## Randomization

Eligible participants will be randomised into Whole-body vibration training group, routine rehabilitation training group and control group at 1:1:1 ratio after consenting and baseline assessment. Excel software will be used to code the subjects in 1-60 according to the recruitment time, and then use the formula "= RAND ()" to generate the corresponding random sequence. By sorting the random sequence and then grouping it, 60 subjects will be randomly grouped. These tasks will be completed by professional computer workers blinded to recruitment and allocation after the completion of recruitment.

## Interventions

### *WBVT intervention*

Because of the stroke characteristics, patients usually have weak muscle strength in the lower limbs and poor balance, they will better accept low-frequency vibration training<sup>[38]</sup>, which has been shown to be more likely to induce changes in brain nerve excitation<sup>[Error! Bookmark not defined.]</sup>. The WBVT intervention will be implemented using a vibrating platform (I-vib5050A; Bodygreen, Taiwan) that generates vertical vibrations and has an adjustable frequency range (6–12 Hz). During WBVT sessions, the subjects will wear shoes to stand on a vibrating platform. The vibration frequency will be increased in a stepwise manner in three phases (weeks 1–4, 5–8, and 9–12) over the 12-week intervention period. The training will consist of adaptation to the vibration (6, 7, and 7 Hz, respectively, in phases 1–3) with 5 minutes of static standing, 1 minute of rest, two rounds of 5 minutes of rhythmic half-squat to standing practice (alternation of 60° knee flexion and standing for 5 seconds each) with vertical vibration (8, 10, and 12 Hz, respectively, in phases 1–3) and 1 minute rest between rounds, 5 minutes of vertical vibration (8, 10, and 12 Hz, respectively, in phases 1–3) under traction created by the placement of a ~4-cm-thick towel under the front sole of the foot to bend the patient's ankle back and pull the calf muscles with 1 minute rest between rounds, and a final 5 minutes of standing with vibration (6, 7, and 7 Hz, respectively, in phases 1–3). The peak-to-peak displacement will be maintained at 4 mm in all phases. The participants will be monitored continuously during training, and training will be terminated immediately upon complaint of any abnormal condition, such as panic, chest tightness, dizziness, or pain (Table 2).

**Table 2.** Whole-body vibration training schedule

| Time | Vibration time<br>(min) | Schedule (min) | Vibration frequency<br>(Hz) |
|------|-------------------------|----------------|-----------------------------|
|------|-------------------------|----------------|-----------------------------|



|                |    |           |      |
|----------------|----|-----------|------|
| Phase I        |    |           |      |
| Week 1 and 2   | 25 | 5-5-5-5-5 | 6-8  |
| Week 3 and 4   | 25 | 5-5-5-5-5 | 6-8  |
| Phase II       |    |           |      |
| Week 5 and 6   | 25 | 5-5-5-5-5 | 7-10 |
| Week 7 and 8   | 25 | 5-5-5-5-5 | 7-10 |
| Phase III      |    |           |      |
| Week 9 and 10  | 25 | 5-5-5-5-5 | 7-12 |
| Week 11 and 12 | 25 | 5-5-5-5-5 | 7-12 |

### ***Routine rehabilitation exercise intervention***

The routine rehabilitation exercise intervention will consist of in-situ alternate leg lifting with the feet at shoulder width (while in a safe, stable position and with the help of both hands/arms), in-situ squatting (to 60–90°, increasingly gradually according to the patient's condition) with the feet at shoulder width (while holding a protective rod), in-situ heel lifting while on a step with the feet at shoulder width (while holding a protective rod), and walking on a treadmill equipped with safety handrails (Table 3). Their exercise intensity will be monitored using the Borg scale (Table 4)<sup>[39]</sup>.

### ***Control group***

These participants will be requested to maintain their original habits of lifestyle. They will receive usual care including usual stroke services available to the participants, including but not limited to, medical consultations offered by hospital, rehabilitation services by community-based organisations.

Participants in the control group will receive telephone follow-up and health lectures but will not receive any specific exercise training from the study scheme.

The specific intervention details of the three groups are shown in Table 5.<sup>[40]</sup>

**Table 3. Routine rehabilitation training**

| Phase         | Exercise                      | Repetitions/duration                                                    |
|---------------|-------------------------------|-------------------------------------------------------------------------|
| I: weeks 1–4  |                               |                                                                         |
|               | Alternating in-situ leg lifts | 2 rounds of 30 s, inter-round interval to complete recovery             |
|               | In-situ squats                | 2 rounds of 8–10 repetitions, inter-round interval to complete recovery |
|               | Step heel lifts               | 2 rounds of 15 repetitions, inter-round interval to complete recovery   |
|               | Walking                       | 5 min                                                                   |
| II: weeks 5–8 |                               |                                                                         |

|                 |                               |                                                                          |
|-----------------|-------------------------------|--------------------------------------------------------------------------|
|                 | Alternating in-situ leg lifts | 3 rounds of 30 s, inter-round intervals to complete recovery             |
|                 | In-situ squats                | 3 rounds of 8–10 repetitions, inter-round intervals to complete recovery |
|                 | Step heel lifts               | 3 rounds of 15 repetitions, inter-round intervals to complete recovery   |
|                 | Walking                       | 10 min                                                                   |
| III: weeks 9–12 | Alternating in-situ leg lifts | 3 rounds of 30 s, inter-round intervals to complete recovery             |
|                 | In-situ squats                | 4 rounds of 8–10 repetitions, inter-round intervals to complete recovery |
|                 | Step heel lifts               | 4 rounds of 15 repetitions, inter-round intervals to complete recovery   |
|                 | Walking                       | 10 minutes                                                               |

**Table 4. Borg scale**

| Level | Description                                                                     |
|-------|---------------------------------------------------------------------------------|
| 6     | No exertion at all                                                              |
| 7     | Extremely light                                                                 |
| 8     | Light                                                                           |
| 9     | Very light (easy, slow walking at a comfortable pace)                           |
| 10    | This is the effort level where you can't hear your breath                       |
| 11    | You are able to easily talk and you can run at this level for a long time       |
| 12    | Light (you are building aerobic endurance)                                      |
| 13    | Somewhat hard (you are making quite an effort; you feel tired but can continue) |
| 14    | You start to hear your breath, but are not gasping for air                      |
| 15    | You can talk, but it is more challenging, you use one- or two-word answers      |
| 16    | Hard (this is considered to be your steady state)                               |
| 17    | Very hard (very strenuous and you are very fatigued)                            |
| 18    | Your breathing is vigorous, you can't talk, you are gasping for air             |
| 19    | Extremely hard (you are counting the minutes until it ends)                     |
| 20    | Maximal exertion                                                                |

**Table 5.** <sup>[40]</sup> Exercise intervention TIDieR

| Item no. | Brief name           | Group                                                                                                                                                                                                                        |                                                                                                                                                      |                                                                                                                                              |
|----------|----------------------|------------------------------------------------------------------------------------------------------------------------------------------------------------------------------------------------------------------------------|------------------------------------------------------------------------------------------------------------------------------------------------------|----------------------------------------------------------------------------------------------------------------------------------------------|
|          |                      | WBVG                                                                                                                                                                                                                         | RRTG                                                                                                                                                 | CG                                                                                                                                           |
| 1        | Why                  | WBVT                                                                                                                                                                                                                         | Routine rehabilitation training                                                                                                                      | Control                                                                                                                                      |
| 2        | What                 | 12 weeks training under the guidance of professionals                                                                                                                                                                        |                                                                                                                                                      | Maintenance of usual living habits, no exercise advice, regular attendance of health lectures, telephone follow-up                           |
| 3        | What (content)       | 25 min exercise, five times/week                                                                                                                                                                                             |                                                                                                                                                      | Attendance of fortnightly health lectures, monthly telephone interviews                                                                      |
| 4        | What (procedure)     | Evaluation at baseline ,6 weeks and 12 weeks, and 4 and 8 weeks after intervention termination,reporting of results to participants so that they can understand the physical changes occurring                               |                                                                                                                                                      |                                                                                                                                              |
| 5        | Who (administrators) | WBVT coach is a professional rehabilitation physician, assessments performed by Shanghai University of Sport PhD students                                                                                                    | Routine rehabilitation training coach is a professional rehabilitation physician, assessments performed by Shanghai University of Sport PhD students | Health lectures and telephone interviews performed by Shanghai University of Sport PhD students (College of Physical Education and Training) |
| 6        | How                  | The exercise interventions will take place in a stationary gymnasium, the instructors will direct the whole group face to face                                                                                               |                                                                                                                                                      | The health lectures will be held in the conference room of the College of Physical Education and Training, Shanghai University of Sport      |
| 7        | When and how much    | See Table 2                                                                                                                                                                                                                  | See Table 3                                                                                                                                          | Health lectures, 30–50 min; interviews, 10 min                                                                                               |
| 8        | How well             | Participants will receive regular feedback, including physical and psychological data and reports on their motor skills learning performance; they will be kept up to date on their progress and status to keep them engaged |                                                                                                                                                      |                                                                                                                                              |

Note:TIDieR, Template for intervention Description and Replication;<sup>[40]</sup> WBVG, whole-body vibration training group; RRTG, routine rehabilitation training group; CG,control group;WBVT, whole-body vibration training.

## Transcranial magnetic stimulation (TMS) protocol

### Electromyographic recording

Surface electromyograms will be recorded from the rectus femoris (RF) muscle with 9-mm-diameter Ag-AgCl surface electrodes. The electrode will be placed on the muscle belly of the RF, and the reference electrode will be located above the patella. (Figure 2). The signal will be amplified (1000×), bandpass filtered (2–2.5 kHz; Intronix

Technologies Model), digitized at 5 kHz by an analog–digital interface (Micro1401; Cambridge Electronics Design, Cambridge, UK), and saved for offline analysis.

## TMS

TMS will be applied to the bilateral M1 with a figure-of-eight–shaped coil (7-cm external loop diameter) connected to two single-pulse monophasic stimulators (Magstim Co., Whitland, Dyfed, UK). The M1 hotspot will be defined as the scalp location inducing the largest peak–peak MEP amplitude in the contralateral RF muscle. The handle of the test stimulus (TS) coil will be angled posteriorly 30–45° from the midsagittal line. TS1mV will be defined as the lowest TMS intensity required to generate MEPs of 1 mV in the relaxed RF muscle in at least 5 of 10 trials. The resting motor threshold (RMT) will be defined as the lowest TMS intensity required to generate MEPs > 50 V in at least 5 of 10 trials with the target muscle completely relaxed<sup>[41]</sup>.

**Figure 2.** EMG acquisition site.

## Isokinetic strength assessment protocol

Due to the particularities of the participants' conditions, for safety reasons and based on previous isokinetic muscle strength research, the angular velocity for isokinetic strength testing in both lower limbs will 60°/s. The testing instrument will be warmed up and debugged before assessment. The assessment will be performed after an adaptability exercise with the participant's body fixed and his or her hands placed in front of the chest. The test action will be repeated five times with intervening 90-s rest intervals. The average peak torque of the flexor and extensor muscles of the knee joint will be taken as the measure of strength. The peak torque is the gold-standard measure for isokinetic assessment, and has shown high degrees of accuracy and repeatability<sup>[42]</sup>.

## Outcomes

### Primary outcome

#### *Neural plasticity*

##### *MEP amplitude*

MEPs will be recorded during TMS. MEP amplitudes will be measured as peak-to-peak values.

##### *Short-interval intracortical inhibition (SICI)*

The intensity of the conditioning stimulus (CS) is 80%RMT or 90%RMT, the intensity of test stimulus (TS) is 1MV. The interstimulus intervals (ISIs) will be 2, 3, and 4 ms. Each block will contain 40 trials in random order<sup>[43][44]</sup>.

##### *M1–pre-SMA connectivity*

To investigate changes in connectivity between the left M1 and pre-SMA after long-term exercise training, the two high-power Magstim 200 devices and two figure-of-eight coil sites will be performed with TMS. Coil placement will be performed as in

1  
2  
3 a similar hemispheric study to avoid overlap<sup>[45]</sup>. The smaller CS coil will be placed over  
4 the right hemisphere to induce a medially directed current in the brain, and will be used  
5 to stimulate the pre-SMA. The TS coil will be placed over the leg representation of the  
6 left hemisphere for the induction of a posterior–anterior current in the brain. The CS  
7 will be delivered by an octagonal coil (50-mm diameter) to stimulate the pre-SMA. Its  
8 intensity will be 110% or 90% of the RMT. The angle between the placement direction  
9 and the scalp midline will be 45° to induce a front-to-back current<sup>[46]</sup>. The TS (M1)  
10 intensity will be set to evoke a resting MEP with the same TMS coil. The ISIs will be  
11 6, 8, 10, 30, 40, and 50 ms. The strength of the CS will be changed for each block, and  
12 complete the order pseudo-random for each subject block. Each block will contain 60  
13 trials. Separate TS will be collected 10 times. The MEP of each ISI will be collected 10  
14 times, for a total of 70 measurements. Each block will contain 70 trials in random order.  
15  
16  
17  
18  
19

### 20 ***Lower-limb motor function***

#### 21 *Peak torque*

22  
23 Participants' lower-limb flexion and extension muscle strength will be measured  
24 by using the Biodex isokinetic testing system (Biodex Medical System 4, NY, USA)  
25 <sup>[47]</sup> at all assessment timepoints.  
26  
27

#### 28 *Brunnstrom stage*

29  
30 The Brunnstrom approach is a set of treatment methods for dyskinesia after central  
31 nervous system injury developed by Swedish physiotherapist Signe Brunnstrom. Motor  
32 function recovery is divided into six stages, with muscle tension increasing gradually  
33 from low to high and joint reaction, joint movement, and spasm gradually becoming  
34 significant. With the completion of common motion, separation motion, and fine  
35 motion appear until they completely return to normal<sup>[48]</sup>.  
36  
37

#### 38 *Fugl-Meyer assessment*

39  
40 Fugl-Meyer assessment (FMA) is a simplified, time-saving means of  
41 evaluating upper- and lower-limb motor function. The index comprises upper-  
42 limb (66 points) and lower-limb (34 points) items (total, 100 points). Higher  
43 scores reflect better functional recovery. FMA scores can be used to  
44 characterize the severity of dyskinesia in stroke patients. Only the lower-limb  
45 FMA items will be applied in this study. The passive range of motion of each  
46 joint of each participant will be determined before FMA. During the assessment,  
47 the non-hemiplegic side will be evaluated first, followed by the hemiplegic  
48 side<sup>[49]</sup>.  
49  
50  
51  
52

#### 53 *Timed up-and-go test*

54  
55 The timed up-and-go test is used to assess patients' mobility, balance,  
56 walking ability, and fall risk. The participant will sit in a standard armchair  
57 with his or her back touching the chair and arms on the armrests. Assistive  
58 devices for walking will be placed near the chair. He or she will then be asked  
59 to walk to a sign placed at a distance of 3 m at a safe and normal speed, turn  
60

around, walk back to the chair, and sit down. The test is complete when the participant's hip touches the seat, and the time taken to complete it (in seconds) will be recorded<sup>[50]</sup>.

### *Berg balance test*

The Berg balance test includes 14 actions, with performance scored on a 0–4 scale (total possible score, 56). Higher scores reflect better balance function. Scores of 0–20 indicate that a patient is safe with wheelchair use, scores of 21–40 indicate that the patient should use an assistive device to walk, and scores of 41–56 indicate that the patient can walk independently; thus, scores < 40 indicate a fall risk<sup>[51]</sup>.

### **Patients and public involvement**

Participants have not been involved in the study recruitment. The author conceived the initial research questions and outcome measures, and modified according to the telephone interviews with patients and their guardians by a research assistant. In order to assure the safety and feasibility of the intervention, ten stroke patients will be invited to learn and practise the whole-body vibration training and routine rehabilitation training before designing the RCT. Whole-body vibration training and routine rehabilitation training were revised based on the exercise performance and feedback provided by the participants. The burden of the intervention will be assessed by patients and their advisors through face-to-face interviews before signing informed consent. The findings of the study will be disseminated to the participants and their guardians.

### **Statistical analysis**

The statistical analysis will be performed by designated members of the research group who will be blinded to participants' group allocations. All statistical analyses will be conducted using IBM SPSS 24.0. All quantitative data will be summarized and presented using appropriate descriptive statistics, and baseline data from the WBVG, RRTG and CG will be analyzed using the independent-samples *t* test. To explore the effects of the training interventions on stroke patients' motor function and neural plasticity, repeated-measures analysis of variance will be used to examine differences in outcomes between and within groups at all assessment timepoints (Table 6).

**Table 6.** Overview of the analysis of differences among study groups

|     | Group                  | Baseline | 12 weeks | 4 weeks after intervention | F (P value) Group effect | F (P value) Interaction effect |
|-----|------------------------|----------|----------|----------------------------|--------------------------|--------------------------------|
| FMA | WBVT<br>RRT<br>Control |          |          |                            |                          |                                |
| TUG | WBVT                   |          |          |                            |                          |                                |

|                  |                        |  |  |  |  |  |
|------------------|------------------------|--|--|--|--|--|
|                  | RRT<br>Control         |  |  |  |  |  |
| Berg             | WBVT<br>RRT<br>Control |  |  |  |  |  |
| Brunnstrom       | WBVT<br>RRT<br>Control |  |  |  |  |  |
| Peak torque      | WBVT<br>RRT<br>Control |  |  |  |  |  |
| Mep<br>amplitude | WBVT<br>RRT<br>Control |  |  |  |  |  |
| SICI             | WBVT<br>RRT<br>Control |  |  |  |  |  |
| M1-pre- SMA      | WBVT<br>RRT<br>Control |  |  |  |  |  |
| MoCA             | WBVT<br>RRT<br>Control |  |  |  |  |  |
| SF-36            | WBVT<br>RRT<br>Control |  |  |  |  |  |

Note: WBVT,whole-body vibration training; RRT,routine rehabilitation training; FMA,Fugl-Meyer assessment;TUG,Time up and go;MoCA,Montreal Cognitive Assessment;SF-36,the MOS item short form health survey;SICI,Short-interval intracortical inhibition;M1, primary motor cortex;pre-SMA,pre-supplementary motor area

## ETHICS AND DISSEMINATION

All individuals who meet the study criteria will be required to sign an informed consent form prior to enrollment in the study. This study protocol has been approved by the Shanghai University of Sport Research Ethics Committee (102772021RT067). Study findings will be disseminated via publication in peer-reviewed journals and presentations at international conferences.

**Funding:**This study was supported by grants from the Research supported by The Program for Overseas High-level talents at Shanghai Institutions of Higher Learning (TP2020063)

## Contributorship statement

Mingkai Zhang: Data curation, Writing- Original draft preparation,Writing- Reviewing



and Editing. Jianing Wei: Visualization, Investigation. Xueping Wu: Conceptualization, Methodology, SoftwarePriya.

### Competing interests

There are no competing interests for any authors.

### Figure legends

**Figure 1.** Diagram of study flow.

Note:WBVT, Whole-body vibration training

### REFERENCES

- [dataset] [1] Benjamin EJ, Virani SS, Callaway CW, *et al.* Data from: Heart disease and stroke statistics-2018 update: a report from the American heart association. *Circulation* ,2018;137:e67–492.doi:10.1161/CIR.0000000000000558
- [dataset] [2] Data from: "Brief report on stroke prevention and treatment in China,2019." *Chinese Journal of Cerebrovascular Disease* ,17.05(2020):272-281. doi:CNKI:SUN:NXGB.0.2020-05-009.
- [dataset] [3] Wist, Sophie , J. Clivaz , and M. Sattelmayer . Data from: "Muscle strengthening for hemiparesis after stroke: A meta-analysis." *Annals of Physical & Rehabilitation Medicine* (2016):114-124..doi:10.1016/j.rehab.2016.02.001.
- [dataset] [4] Yulian Zhu. Data from: *Effects of Modified Constraint-induced Movement Therapy on Walking Ability and Gait in Stroke Patients with Hemiplegic*.2016.Shanghai University of Sport,PhD dissertation.
- [dataset] [5] Broderick, P. , *et al.* Data from: "Mirror therapy for improving lower limb motor function and mobility after stroke: A systematic review and meta-analysis." *Gait & Posture* (2018): 63: 208-220.doi: 10.1016/j.gaitpost.2018.05.017.
- [dataset] [6] Ramsay, J. W. , *et al.* Data from: "Paretic muscle atrophy and non-contractile tissue content in individual muscles of the post-stroke lower extremity." *Journal of Biomechanics* 44.16(2011):2741-2746.doi:10.1016/j.jbiomech.2011.09.001.
- [dataset] [7] Oh, D. S. , and J. D. Choi . Data from: "The effect of motor imagery training for trunk movements on trunk muscle control and proprioception in stroke patients." *Journal of Physical Therapy Science* 29.7(2017):1224-1228.doi:10.1598/jpts.29.1224.
- [dataset] [8] Kline, T. L. , B. D. Schmit , and D. G. Kamper . Data from: "Exaggerated interlimb neural coupling following stroke." *Brain A Journal of Neurology* 1:159-169.doi:10.1093/brain/awl278.
- [dataset] [9] Fulk, G. D. , *et al.* Data from: "Estimating Clinically Important Change in Gait Speed in People With Stroke Undergoing Outpatient Rehabilitation." *Journal of Neurologic Physical Therapy* 35.2(2011):82-89.doi:10.1097/NPT.0b013e318218e2f2.
- [dataset] [10] Yali Liang.Data from: *Effect of Pro Kin balance training combined with suspension training on lower limb motor function of stroke patients*.2021.Shengyang Sports University,MA thesis.
- [dataset] [11] Longfeng Qi. Data from: *Effects of repetitive transcranial magnetic stimulation on lower extremity motor function in patients after stroke*.2019.Qingdao University,MA thesis.
- [dataset] [12] Liang, *et al.* Data from: "Dynamic functional reorganization of the motor execution network after stroke. " *Brain: A Journal of Neurology* 133.4(2010):1224-1238.doi:10.1093/brain/awq043.
- [dataset] [13] Corti, M. . Data from: "Repetitive transcranial magnetic stimulation of motor cortex after stroke: a focused review. " *American Journal of Physical Medicine & Rehabilitation* 91.3(2012):254-270.doi:10.1097/PHM.0b013e318228bf0c
- [dataset] [14] Dimyan, M. A. , and L. G. Cohen . Data from: "Neuroplasticity in the context of



- motor rehabilitation after stroke. " *Nature Reviews Neurology* 7.2(2011):76-85.  
doi:10.1038/nrneurol.2010.200
- [dataset] [15] Graziano, Msa , and T. N. Aflalo . Data from: "Mapping Behavioral Repertoire onto the Cortex." *Neuron* 56.2(2007):239-251.doi:10.1016/j.neuron.2007.09.013
- [dataset] [16] Jue Wang. Data from: *TMS modulation effect : Individualized precise- localization of hand motor area and evaluation of its aftereffect*.2020.Shanghai University of Sport,PhD dissertation.
- [dataset] [17] Nachev, P. , et al. Data from: "The role of the pre-supplementary motor area in the control of action." *NeuroImage* 36(2007):T155-T163.doi: 10.1016/j.neuroimage.2007.03.034
- [dataset] [18] Tzika, and Aria. Data from: "fMRI as a molecular imaging procedure for the functional reorganization of motor systems in chronic stroke." *Molecular Medicine Reports* 8.3(2013):775-779.doi: 10.3892/mmr.2013.1603.
- [dataset] [19] Yongjun Wang, et al. Data from: "China stroke report 2019 (Chinese version) ( 1 ) ." *Chinese Journal of Stroke* 15.10(2020):1037-1043. doi:CNKI:SUN:ZUZH.0.2020-10-001.
- [dataset] [20] Ward NS, Cohen LG. Data from: Mechanisms underlying recovery of motor function after stroke. *Arch Neurol.* 2004;61:1844-1848.doi: 10.1111/j.1398-9995.2007.01342.x.
- [dataset] [21] Rensink, M. , et al. Data from: "Task-oriented training in rehabilitation after stroke: systematic review. " *Journal of Advanced Nursing* 65.4(2010):737-754. doi: 10.1111/j.1365-2648.2008.04925.x
- [dataset] [22] Classen, J. , et al. Data from: "Rapid plasticity of human cortical movement representation induced by practice. " *Journal of Neurophysiology* 79.2(1998):1117-23.doi:10.1007/s002329900335
- [dataset] [23] Zheng, G. Z. , and M. Chopp . Data from: "Neurorestorative therapies for stroke: underlying mechanisms and translation to the clinic." *Lancet Neurology* 8.5(2009):491-500.doi:10.1016/S1474-4422(09)70061-4
- [dataset] [24] Lo, Suzanne Hoi Shan, et al. Data from: "Feasibility of a ballet-inspired low-impact at-home workout programme for adults with stroke: a mixed-methods exploratory study protocol." *BMJ open* 11.4 (2021): e045064.doi:10.1136/bmjopen-2020-045064
- [dataset] [25] Rauch, F. , et al. Data from: "Reporting whole-body vibration intervention studies: Recommendations of the International Society of Musculoskeletal and Neuronal Interactions." *J Musculoskelet Neuronal Interact* 10.3(2010):193-198.doi:10.1080/0305006910270105
- [dataset] [26] Zee, Eavd . Data from: "Reporting Guidelines for Whole-Body Vibration Studies in Humans, Animals and Cell Cultures: A Consensus Statement from an International Group of Experts." *Biology* 10.10:965.doi:10.3390/biology10100965
- [dataset] [27] Wuestefeld, A. , et al. Data from: "Towards reporting guidelines of research using whole-body vibration as training or treatment regimen in human subjects—A Delphi consensus study." *PLOS ONE* 15(2020).doi:10.1371/journal.pone.0235905
- [dataset] [28] Huang, Meizhen, et al. Data from: "Whole-body vibration modulates leg muscle reflex and blood perfusion among people with chronic stroke: a randomized controlled crossover trial." *Scientific reports* 10.1 (2020): 1-11.doi:10.1038/s41598-020-58479-5
- [dataset] [29] Celletti, Claudia, et al. Data from: "Promoting post-stroke recovery through focal or whole body vibration: criticisms and prospects from a narrative review." *Neurological Sciences* 41.1 (2020): 11-24.doi:10.1007/s10072-019-04047-3
- [dataset] [30] Chan, K. S. , et al. Data from: "Effects of a single session of whole body vibration on ankle plantarflexion spasticity and gait performance in patients with chronic stroke: a randomized controlled trial. " *Clinical Rehabilitation* 26.12(2012):1087.doi:10.1177/0269215512446314
- [dataset] [31] Hilgers, C. , et al. Data from: "Effects of whole-body vibration training on physical function in patients with Multiple Sclerosis." *Neurorehabilitation* 32.3(2013):655-663.doi:10.3233/NRE-130888
- [dataset] [32] El-Shamy, S. M. . Data from: "Effect of whole-body vibration on muscle strength and balance in diplegic cerebral palsy: a randomized controlled trial. " *Am J Phys Med Rehabil* 93.2(2014):114-121.doi:10.1097/PHM.0b013e3182a541a4

- [dataset] [33] B Sañudo, et al. Data from: "Clinical Approaches of Whole-Body Vibration Exercises in Individuals with Stroke: A Narrative Revision." *Rehabilitation Research and Practice* 2018(2018):1-8.doi:10.1155/2018/8180901
- [dataset] [34] Murillo, N. , et al. Data from: "Focal vibration in neurorehabilitation." *European journal of physical and rehabilitation medicine* 50.2(2014):231-242.doi:10.1186/1743-0003-11-47
- [dataset] [35] Liao, Lin-Rong, et al. Data from: "Cardiovascular stress induced by whole-body vibration exercise in individuals with chronic stroke." *Physical therapy* 95.7 (2015): 966-977.doi:10.2522/ptj.20140295
- [dataset] [36]Alashram, Anas R., Elvira Padua, and Giuseppe Annino. Data from: "Effects of whole-body vibration on motor impairments in patients with neurological disorders: a systematic review." *American journal of physical medicine & rehabilitation* 98.12(2019): 1084-1098. doi:10.1097/PHM.0000000000001252
- [dataset] [37] Binder, Christian, Ali Ekber Kaya, and Joachim Liepert. Data from: "Vibration prolongs the cortical silent period in an antagonistic muscle." *Muscle & Nerve: Official Journal of the American Association of Electrodiagnostic Medicine* 39.6 (2009): 776-780.doi:10.1002/mus.21240
- [dataset] [38] Issurin, V. B. , and G. Tenenbaum . Data from: "Acute and residual effects of vibratory stimulation on explosive strength in elite and amateur athletes." *Journal of Sports Sciences* 17.3(1999):177-182.doi:10.1080/026404199366073
- [dataset] [39] Kamps, A., and K. Schüle. Data from: "Cyclic movement training of the lower limb in stroke rehabilitation." *Neurol Rehabil* 11.5 (2005): 1-12.doi:http://dx.doi.org/
- [dataset] [40] Hoffman et al. Data from: Better reporting of interventions: template for intervention description and replication (TIDieR) checklist and guide. *BMJ* 2014; 348 doi: https://doi.org/10.1136/bmj.g1687
- [dataset] [41] O'Shea, Jacinta, et al. Data from: "Functional specificity of human premotor–motor cortical interactions during action selection." *European Journal of Neuroscience* 26.7 (2007): 2085-2095.doi: 10.1111/j.1460-9568.2007.05795.x
- [dataset] [42] Pontes, Sarah Souza, et al. Data from: "Effects of isokinetic muscle strengthening on muscle strength, mobility, and gait in post-stroke patients: a systematic review and meta-analysis." *Clinical rehabilitation* 33.3 (2019): 381-394.doi:10.1177/0269215518815220
- [dataset] [43] Kujirai, T. , et al. Data from: "Corticocortical inhibition in human motor cortex." *Journal of Physiology* 471.1(1993):501–519.doi:10.1113/jphysiol.1993.sp019912
- [dataset] [44] Ziemann, U. , J. C. Rothwell , and M. C. Ridding . Data from: "Interaction between intracortical inhibition and facilitation in human motor cortex. " *Journal of Physiology* 496.Pt 3(1996):873–881.doi:10.1113/jphysiol.1996.sp021734
- [dataset] [45] Zheng, Y. , et al. Data from: "Selective serotonin reuptake inhibition modulates response inhibition in Parkinson's disease." *Brain* 137.4(2014):1145-1155. doi:10.1093/brain/awu032
- [dataset] [46] Wang, Yanqiu, et al. Data from: "Hemispheric Differences in Functional Interactions Between the Dorsal Lateral Prefrontal Cortex and Ipsilateral Motor Cortex." *Frontiers in Human Neuroscience* 14 (2020): 202. doi:10.3389/fnhum.2020.00202
- [dataset] [47] Nascimento, L. R. , et al. Data from: "Strength deficits of the shoulder complex during isokinetic testing in people with chronic stroke." *Brazilian Journal of Physical Therapy* 18.3(2014):268.doi:10.1590/bjpt-rbf.2014.0030
- [dataset] [48] Farrell Iii, John W., Jordan Merkas, and Lara A. Pilutti. Data from: The Effect of Exercise Training on Gait, Balance, and Physical Fitness Asymmetries in Persons With Chronic Neurological Conditions: A Systematic Review of Randomized Controlled Trials[J].*Frontiers in Physiology* 2020, 11: 1316.doi:10.3389/fphys.2020.585765
- [dataset] [49] Fernandez-Gonzalo, Rodrigo, et al. Data from: "Muscle, functional and cognitive adaptations after flywheel resistance training in stroke patients: a pilot randomized controlled trial." *Journal of neuroengineering and rehabilitation* 13.1 (2016): 1-11.doi:10.1186/s12984-016-0144-7
- [dataset] [50] Munari, Daniele, et al. Data from: "High-intensity treadmill training improves gait

---

ability, VO<sub>2</sub>peak and cost of walking in stroke survivors: preliminary results of a pilot randomized controlled trial." *Eur J Phys Rehabil Med* 54.3 (2018): 408-418.doi:10.23736/S1973-9087.16.04224-6

[dataset] [51] Gordon, C. D. , R. Wilks , and A. Mccaw-Binns . Data from: "Effect of aerobic exercise (walking) training on functional status and health-related quality of life in chronic stroke survivors: a randomized controlled trial. " *Stroke* 44.4(2013):1179-1181.doi: 10.1161/STROKEAHA.111.000642

For peer review only



840x1029mm (72 x 72 DPI)

1  
2  
3  
4  
5  
6  
7  
8  
9  
10  
11  
12  
13  
14  
15  
16  
17  
18  
19  
20  
21  
22  
23  
24  
25  
26  
27  
28  
29  
30  
31  
32  
33  
34  
35  
36  
37  
38  
39  
40  
41  
42  
43  
44  
45  
46  
47  
48  
49  
50  
51  
52  
53  
54  
55  
56  
57  
58  
59  
60



Figure 2 EMG acquisition site  
69x86mm (144 x 144 DPI)

# Reporting checklist for protocol of a clinical trial.

Based on the SPIRIT guidelines.

## Instructions to authors

Complete this checklist by entering the page numbers from your manuscript where readers will find each of the items listed below.

Your article may not currently address all the items on the checklist. Please modify your text to include the missing information. If you are certain that an item does not apply, please write "n/a" and provide a short explanation.

Upload your completed checklist as an extra file when you submit to a journal.

In your methods section, say that you used the SPIRIT reporting guidelines, and cite them as:

Chan A-W, Tetzlaff JM, Gøtzsche PC, Altman DG, Mann H, Berlin J, Dickersin K, Hróbjartsson A, Schulz KF, Parulekar WR, Krleža-Jerić K, Laupacis A, Moher D. SPIRIT 2013 Explanation and Elaboration: Guidance for protocols of clinical trials. *BMJ*. 2013;346:e7586

|                                   | Reporting Item                                                                                                                                                                           | Page Number |
|-----------------------------------|------------------------------------------------------------------------------------------------------------------------------------------------------------------------------------------|-------------|
| <b>Administrative information</b> |                                                                                                                                                                                          |             |
| Title                             | <a href="#">#1</a> Effects of whole-body vibration training on lower-limb motor function and neural plasticity in stroke patients: protocol for a randomized controlled clinical trial   | 3           |
| Trial registration                | <a href="#">#2a</a> This study has been registered prospectively in the Chinese Clinical Trial Registry(ChiCTR2200055143)                                                                | 3           |
| Trial registration: data set      | <a href="#">#2b</a> 2022.1-2023.5                                                                                                                                                        |             |
| Protocol version                  | <a href="#">#3</a> 2022.3-2022.10                                                                                                                                                        |             |
| Funding                           | <a href="#">#4</a> This study was supported by grants from the Research supported by The Program for Overseas High-level talents at Shanghai Institutions of Higher Learning (TP2020063) | 16          |
| Roles and                         | <a href="#">#5a</a> Mingkai Zhang:Data curation, Writing- Original draft                                                                                                                 | 16          |

responsibilities: preparation, Writing- Reviewing and Editing.

contributorship

Roles and [#5b](#)

responsibilities:

sponsor contact

information

Roles and [#5c](#)

responsibilities:

sponsor and funder

Roles and [#5d](#)

responsibilities:

committees

Jianing Wei: Visualization, Investigation. Xueping

Wu: Conceptualization, Methodology, Software/Priya.

16

## Introduction

Background and [#6a](#)

rationale

Stroke is prevalent and associated with high disability, recurrence, 3

and mortality rates. Stroke patients often have a variety of sequelae. The most common is hemiplegia, which is characterized by numbness and weakness of one limb and continuous increases in muscle tension. The improvement of affected patients' muscle strength, balance, and walking ability is key to the improvement of their lower-limb motor function. Changes in neural plasticity after stroke have been shown to be the basis for the recovery of motor function.

Changes in neural plasticity after stroke have been shown to be the basis for the recovery of motor function. In addition to improving muscle strength and joint activity, exercise intervention therapy can aid the recovery of neural plasticity and brain function, thereby promoting the recovery of motor function. The key to effective rehabilitation is to give patients greater motor stimulation within their limited range of activities.

As a passive training method, whole-body vibration training (WBVT) involves the generation of mechanical waves through a training platform to stimulate muscle vibration and neuromuscular regulation and adaptation. It has also been found to effectively improve the lower-limb muscle strength, spasm, walking ability, and balance of many people, including stroke patients.



|    |                           |                      |                                                                      |   |
|----|---------------------------|----------------------|----------------------------------------------------------------------|---|
| 1  | Background and            | <a href="#">#6b</a>  |                                                                      |   |
| 2  | rationale: choice of      |                      |                                                                      |   |
| 3  | comparators               |                      |                                                                      |   |
| 4  |                           |                      |                                                                      |   |
| 5  |                           |                      |                                                                      |   |
| 6  | Objectives                | <a href="#">#7</a>   | We aim to determine the effect of 12 weeks of WBVT on stroke         | 6 |
| 7  |                           |                      | patients' lower-limb motor function and neural plasticity, and       |   |
| 8  |                           |                      | explore the difference between wbvt and routine rehabilitation       |   |
| 9  |                           |                      | training after 6 and 12 weeks of training. In addition, we will      |   |
| 10 |                           |                      | evaluate and compare it after 4 and 8 weeks of stopping training.    |   |
| 11 |                           |                      | We will also assess the feasibility of a future full-scale RCT.      |   |
| 12 |                           |                      |                                                                      |   |
| 13 |                           |                      |                                                                      |   |
| 14 |                           |                      |                                                                      |   |
| 15 |                           |                      |                                                                      |   |
| 16 | Trial design              | <a href="#">#8</a>   | This study was designed as a prospective single-blind RCT.           | 6 |
| 17 |                           |                      | Eligible participants with stroke will be assigned randomly to the   |   |
| 18 |                           |                      | whole-body vibration training group (WBVG), routine                  |   |
| 19 |                           |                      | rehabilitation training group (RRTG), and control group (CG) at a    |   |
| 20 |                           |                      | ratio of 1:1:1. The WBVG and RRTG will receive exercise              |   |
| 21 |                           |                      | interventions in the Sports Laboratory of Shanghai University of     |   |
| 22 |                           |                      | Sport, Shanghai, China. The CG will maintain their routine daily     |   |
| 23 |                           |                      | lives. The interventions will be implemented 5 times a week for      |   |
| 24 |                           |                      | 12 weeks. Participants will be evaluated at baseline, after 6 and 12 |   |
| 25 |                           |                      | weeks of intervention, and 4 and 8 weeks after intervention          |   |
| 26 |                           |                      | termination                                                          |   |
| 27 |                           |                      |                                                                      |   |
| 28 |                           |                      |                                                                      |   |
| 29 |                           |                      |                                                                      |   |
| 30 |                           |                      |                                                                      |   |
| 31 |                           |                      |                                                                      |   |
| 32 |                           |                      |                                                                      |   |
| 33 | <b>Methods:</b>           |                      |                                                                      |   |
| 34 | <b>Participants,</b>      |                      |                                                                      |   |
| 35 | <b>interventions, and</b> |                      |                                                                      |   |
| 36 | <b>outcomes</b>           |                      |                                                                      |   |
| 37 |                           |                      |                                                                      |   |
| 38 |                           |                      |                                                                      |   |
| 39 |                           |                      |                                                                      |   |
| 40 | Study setting             | <a href="#">#9</a>   | Shanghai university of sport, Shanghai, China                        |   |
| 41 |                           |                      |                                                                      |   |
| 42 | Eligibility criteria      | <a href="#">#10</a>  | 1) clinical diagnosis of first ischemic or hemorrhagic stroke, 2)    | 7 |
| 43 |                           |                      | Montreal Cognitive Assessment (MoCA) score > 20, 3)                  |   |
| 44 |                           |                      | Brunnstrom stage III or IV, 4) ability to stand and walk without     |   |
| 45 |                           |                      | the help of another person, 5) stable medical condition, and 6)      |   |
| 46 |                           |                      | duration of illness ≥ 6 months                                       |   |
| 47 |                           |                      |                                                                      |   |
| 48 |                           |                      |                                                                      |   |
| 49 |                           |                      |                                                                      |   |
| 50 |                           |                      |                                                                      |   |
| 51 | Interventions:            | <a href="#">#11a</a> | <b>Table 2.</b> Vibration training schedule                          | 8 |
| 52 | description               |                      | <b>Table 3.</b> Routine rehabilitation training                      |   |
| 53 |                           |                      | <b>Table 5.</b> Intervention overview                                |   |
| 54 |                           |                      |                                                                      |   |
| 55 |                           |                      |                                                                      |   |
| 56 |                           |                      |                                                                      |   |
| 57 |                           |                      |                                                                      |   |
| 58 |                           |                      |                                                                      |   |
| 59 |                           |                      |                                                                      |   |
| 60 |                           |                      |                                                                      |   |



|    |                      |                      |                                                                                                                 |    |
|----|----------------------|----------------------|-----------------------------------------------------------------------------------------------------------------|----|
| 1  | Interventions:       | <a href="#">#11b</a> | <b>Table 5.</b> Intervention overview                                                                           | 10 |
| 2  | modifications        |                      |                                                                                                                 |    |
| 3  |                      |                      |                                                                                                                 |    |
| 4  |                      |                      |                                                                                                                 |    |
| 5  | Interventions:       | <a href="#">#11c</a> | <b>Table 5.</b> Intervention overview                                                                           | 10 |
| 6  | adherence            |                      |                                                                                                                 |    |
| 7  |                      |                      |                                                                                                                 |    |
| 8  |                      |                      |                                                                                                                 |    |
| 9  |                      |                      |                                                                                                                 |    |
| 10 | Interventions:       | <a href="#">#11d</a> | <b>Table 5.</b> Intervention overview                                                                           | 10 |
| 11 | concomitant care     |                      |                                                                                                                 |    |
| 12 |                      |                      |                                                                                                                 |    |
| 13 |                      |                      |                                                                                                                 |    |
| 14 |                      |                      |                                                                                                                 |    |
| 15 | Outcomes             | <a href="#">#12</a>  | <b>Neural plasticity:</b> MEP amplitude,Short-interval intracortical inhibition (SICI) ,M1-pre-SMA connectivity | 12 |
| 16 |                      |                      |                                                                                                                 |    |
| 17 |                      |                      |                                                                                                                 |    |
| 18 |                      |                      |                                                                                                                 |    |
| 19 |                      |                      | <b>Lower-limb motor function:</b> Peak torque,Brunnstrom                                                        |    |
| 20 |                      |                      | stage,Fugl-Meyer assessment,Timed up-and-go test,Berg                                                           |    |
| 21 |                      |                      | balance test,36-item Short Form Survey                                                                          |    |
| 22 |                      |                      |                                                                                                                 |    |
| 23 |                      |                      |                                                                                                                 |    |
| 24 |                      |                      |                                                                                                                 |    |
| 25 |                      |                      |                                                                                                                 |    |
| 26 |                      |                      |                                                                                                                 |    |
| 27 |                      |                      |                                                                                                                 |    |
| 28 |                      |                      |                                                                                                                 |    |
| 29 |                      |                      |                                                                                                                 |    |
| 30 |                      |                      |                                                                                                                 |    |
| 31 |                      |                      |                                                                                                                 |    |
| 32 |                      |                      |                                                                                                                 |    |
| 33 |                      |                      |                                                                                                                 |    |
| 34 |                      |                      |                                                                                                                 |    |
| 35 |                      |                      |                                                                                                                 |    |
| 36 |                      |                      |                                                                                                                 |    |
| 37 |                      |                      |                                                                                                                 |    |
| 38 |                      |                      |                                                                                                                 |    |
| 39 |                      |                      |                                                                                                                 |    |
| 40 |                      |                      |                                                                                                                 |    |
| 41 |                      |                      |                                                                                                                 |    |
| 42 |                      |                      |                                                                                                                 |    |
| 43 |                      |                      |                                                                                                                 |    |
| 44 |                      |                      |                                                                                                                 |    |
| 45 |                      |                      |                                                                                                                 |    |
| 46 |                      |                      |                                                                                                                 |    |
| 47 | Participant timeline | <a href="#">#13</a>  | This study was designed as a prospective single-blind RCT.                                                      | 6  |
| 48 |                      |                      | Eligible participants with stroke will be assigned randomly to the                                              |    |
| 49 |                      |                      | whole-body vibration training group (WBVG), routine                                                             |    |
| 50 |                      |                      | rehabilitation training group (RRTG), and control group (CG) at a                                               |    |
| 51 |                      |                      | ratio of 1:1:1. The WBVG and RRTG will receive exercise                                                         |    |
| 52 |                      |                      | interventions in the Sports Laboratory of Shanghai University of                                                |    |
| 53 |                      |                      | Sport, Shanghai, China. The CG will maintain their routine daily                                                |    |
| 54 |                      |                      | lives. The interventions will be implemented 5 times a week for                                                 |    |
| 55 |                      |                      |                                                                                                                 |    |
| 56 |                      |                      |                                                                                                                 |    |
| 57 |                      |                      |                                                                                                                 |    |
| 58 |                      |                      |                                                                                                                 |    |
| 59 |                      |                      |                                                                                                                 |    |
| 60 |                      |                      |                                                                                                                 |    |

12 weeks. Participants will be evaluated at baseline, after 6 and 12 weeks of intervention, and 4 and 8 weeks after intervention termination

|                                                                                         |             |                     |                                                                                                                                                                                                                                                                                                                                                                                                                                                                                                                                                                                                           |   |
|-----------------------------------------------------------------------------------------|-------------|---------------------|-----------------------------------------------------------------------------------------------------------------------------------------------------------------------------------------------------------------------------------------------------------------------------------------------------------------------------------------------------------------------------------------------------------------------------------------------------------------------------------------------------------------------------------------------------------------------------------------------------------|---|
| 5<br>6<br>7<br>8<br>9<br>10<br>11<br>12<br>13<br>14<br>15<br>16<br>17<br>18<br>19<br>20 | Sample size | <a href="#">#14</a> | The sample size has been estimated using the G*power statistical software (version 3.1.9.2 for Windows 7 X64; Franz Faul, Kiel University, Germany), used widely for this purpose. In this part of the study, the sample size was estimated by F tests: analysis of variance (ANOVA): related measures, between factors: computer required sample size. Under the significance level of 0.05 and repeated-measures ANOVA setting of 80% efficacy, the total number of subjects needed was determined to be 42 (14 per group). Considering a 20% loss rate, we plan to recruit 60 subjects (20 per group). | 8 |
| 21<br>22<br>23<br>24<br>25<br>26<br>27                                                  | Recruitment | <a href="#">#15</a> | Participants in Shanghai will be recruited through community outreach, from outpatient clinics, with media advertising, and by telephone. All participants will follow their routine medication and physical therapy/massage regimens during the study period                                                                                                                                                                                                                                                                                                                                             | 7 |

28 **Methods:**  
29 **Assignment of**  
30 **interventions (for**  
31 **controlled trials)**

|                                                                                                                                  |                                  |                      |                                                                                                                                                                                                                                                                                                                                                                                                                                                                                                                                                                                                                                                                                                                                         |   |
|----------------------------------------------------------------------------------------------------------------------------------|----------------------------------|----------------------|-----------------------------------------------------------------------------------------------------------------------------------------------------------------------------------------------------------------------------------------------------------------------------------------------------------------------------------------------------------------------------------------------------------------------------------------------------------------------------------------------------------------------------------------------------------------------------------------------------------------------------------------------------------------------------------------------------------------------------------------|---|
| 32<br>33<br>34<br>35<br>36<br>37<br>38<br>39<br>40<br>41<br>42<br>43<br>44<br>45<br>46<br>47<br>48<br>49<br>50<br>51<br>52<br>53 | Allocation: sequence generation  | <a href="#">#16a</a> | This study was designed as a prospective single-blind RCT. Eligible participants with stroke will be assigned randomly to the whole-body vibration training group (WBVG), routine rehabilitation training group (RRTG), and control group (CG) at a ratio of 1:1:1. The WBVG and RRTG will receive exercise interventions in the Sports Laboratory of Shanghai University of Sport, Shanghai, China. The CG will maintain their routine daily lives. Numbers (1–60) will be assigned to the participants according to their recruitment times in an Excel software database, and then a random sequence will be generated using the "= rand ()" formula. This sequence will be sorted to allocate the participants to the study groups. | 8 |
| 54<br>55<br>56<br>57<br>58<br>59<br>60                                                                                           | Allocation concealment mechanism | <a href="#">#16b</a> | This study was designed as a prospective single-blind RCT. Eligible participants with stroke will be assigned randomly to the whole-body vibration training group (WBVG), routine rehabilitation training group (RRTG), and control group (CG) at a                                                                                                                                                                                                                                                                                                                                                                                                                                                                                     | 8 |

ratio of 1:1:1. The WBVG and RRTG will receive exercise interventions in the Sports Laboratory of Shanghai University of Sport, Shanghai, China. The CG will maintain their routine daily lives. Numbers (1–60) will be assigned to the participants according to their recruitment times in an Excel software database, and then a random sequence will be generated using the "= rand ()" formula. This sequence will be sorted to allocate the participants to the study groups.

|    |                                                                       |                      |                                                                                                                                                                                                                                                                                                                                                                                                                                                                                                                                |
|----|-----------------------------------------------------------------------|----------------------|--------------------------------------------------------------------------------------------------------------------------------------------------------------------------------------------------------------------------------------------------------------------------------------------------------------------------------------------------------------------------------------------------------------------------------------------------------------------------------------------------------------------------------|
| 13 | Allocation:                                                           | <a href="#">#16c</a> |                                                                                                                                                                                                                                                                                                                                                                                                                                                                                                                                |
| 14 | implementation                                                        |                      |                                                                                                                                                                                                                                                                                                                                                                                                                                                                                                                                |
| 17 | Blinding (masking)                                                    | <a href="#">#17a</a> | The data is analyzed by specialized PhD students, they analyse the data be blind to group allocation.                                                                                                                                                                                                                                                                                                                                                                                                                          |
| 23 | Blinding (masking):<br>emergency<br>unblinding                        | <a href="#">#17b</a> | After the results are processed, the grouping can be announced                                                                                                                                                                                                                                                                                                                                                                                                                                                                 |
| 28 | <b>Methods: Data<br/>collection,<br/>management, and<br/>analysis</b> |                      |                                                                                                                                                                                                                                                                                                                                                                                                                                                                                                                                |
| 35 | Data collection plan                                                  | <a href="#">#18a</a> | The data is analyzed by specialized PhD students                                                                                                                                                                                                                                                                                                                                                                                                                                                                               |
| 39 | Data collection plan:<br>retention                                    | <a href="#">#18b</a> |                                                                                                                                                                                                                                                                                                                                                                                                                                                                                                                                |
| 43 | Data management                                                       | <a href="#">#19</a>  | The data is analyzed by specialized PhD students                                                                                                                                                                                                                                                                                                                                                                                                                                                                               |
| 48 | Statistics: outcomes                                                  | <a href="#">#20a</a> | The statistical analysis will be performed by designated members of the research group who will be blinded to participants' group allocations. All statistical analyses will be conducted using IBM SPSS 24.0. All quantitative data will be summarized and presented using appropriate descriptive statistics, and baseline data from the WBVG , RRTG and CG will be analyzed using the independent-samples <i>t</i> test. To explore the effects of the training interventions on stroke patients' motor function and neural |

14

plasticity, repeated-measures analysis of variance will be used to examine differences in outcomes between and within groups at all assessment timepoints

Statistics: additional analyses [#20b](#)

Statistics: analysis population and missing data [#20c](#)

## Methods: Monitoring

Data monitoring: formal committee [#21a](#) The data is analyzed by specialized PhD students, they analyse the data be blind to group allocation.

Data monitoring: interim analysis [#21b](#)

Harms [#22](#) In the Participants gave an informed consent form

Auditing [#23](#) In the Participants gave an informed consent form

## Ethics and dissemination

Research ethics approval [#24](#) This study has been approved by the Shanghai University of Sport Research Ethics Committee (102772021RT067) 3

Protocol amendments [#25](#) Upload as attachment

Consent or assent [#26a](#) PhD students in charge of data collection will collect data within the TMS and lower limbs function will be conducted before the intervention as well as at 6 weeks, 12 weeks, and 4 weeks and 8weeks after the intervention

Consent or assent: [#26b](#)

1 ancillary studies

2 Confidentiality [#27](#) Professor Wu, who is in charge of recruitment, completes the  
3  
4 participant information management.  
5  
6

7  
8  
9 Declaration of [#28](#) The authors have no conflicts of interest to declare  
10 interests  
11  
12

13  
14 Data access [#29](#) The result will be made public by the person in charge of the Research  
15 supported by The Program for Overseas High-level talents at  
16 Shanghai Institutions of Higher Learning (TP2020063)  
17  
18  
19  
20  
21  
22

23  
24 Ancillary and post [#30](#) In the Participants gave an informed consent form.  
25 trial care  
26  
27

28 Dissemination policy: [#31a](#) This study has been registered prospectively in the Chinese  
29 trial results Clinical Trail Registry(ChiCTR2200055143,1 January 2022).It  
30 will be published in accordance with the standards of the Chinese  
31 Clinical Trial Registry  
32  
33  
34  
35  
36

37 Dissemination policy: [#31b](#) It will be written in accordance with the standards of the Chinese  
38 authorship Clinical Trial Registry.  
39  
40  
41  
42  
43

44 Dissemination policy: [#31c](#) It can be viewed in the Chinese Clinical Trial Registry.  
45 reproducible  
46 research  
47  
48

## 49 Appendices

50  
51 Informed consent [#32](#) Upload as attachment.  
52 materials  
53  
54  
55

56 Biological specimens [#33](#) None  
57  
58  
59  
60

1 None The SPIRIT Explanation and Elaboration paper is distributed under the terms of the Creative  
2 Commons Attribution License CC-BY-NC. This checklist can be completed online using  
3 <https://www.goodreports.org/>, a tool made by the [EQUATOR Network](#) in collaboration with  
4 [Penelope.ai](#)  
5  
6  
7  
8  
9  
10  
11  
12  
13  
14  
15  
16  
17  
18  
19  
20  
21  
22  
23  
24  
25  
26  
27  
28  
29  
30  
31  
32  
33  
34  
35  
36  
37  
38  
39  
40  
41  
42  
43  
44  
45  
46  
47  
48  
49  
50  
51  
52  
53  
54  
55  
56  
57  
58  
59  
60

For peer review only
